# Supplementary material for: Loss of the Yeast SR Protein Npl3 Alters Gene Expression Due to Transcription Readthrough
Source: PubMed Central journal article supplement (PMC4687934; doi:10.1371/journal.pgen.1005735), 2015-12-22
Supplement: pgen.1005735.s001.pdf [file pgen.1005735.s001.pdf]

**A**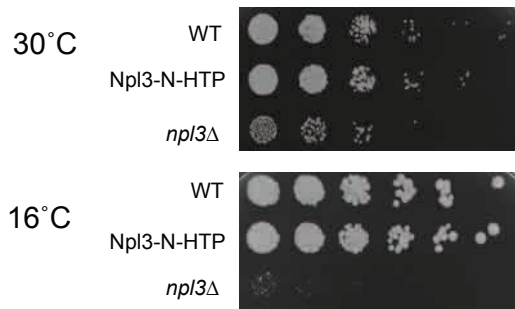**B**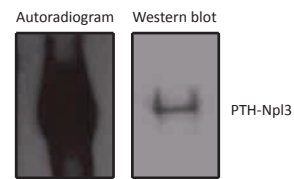**C**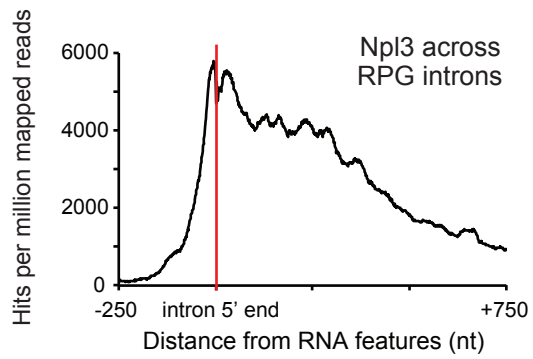**D**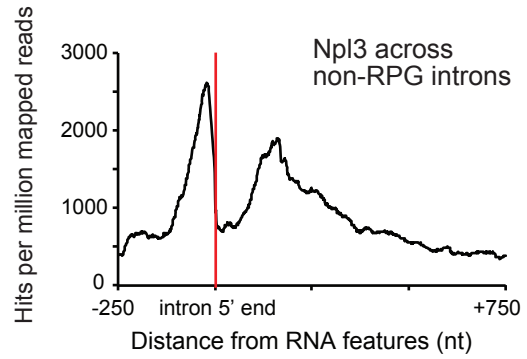**E**

| k-mer | z-score |
|-------|---------|
| UGAG  | 12.72   |
| AUUG  | 10.95   |
| UCUG  | 10.12   |
| AGUG  | 10.01   |
