# Supplementary material for: Loss of the Yeast SR Protein Npl3 Alters Gene Expression Due to Transcription Readthrough
Source: PubMed Central journal article supplement (PMC4687934; doi:10.1371/journal.pgen.1005735), 2015-12-22

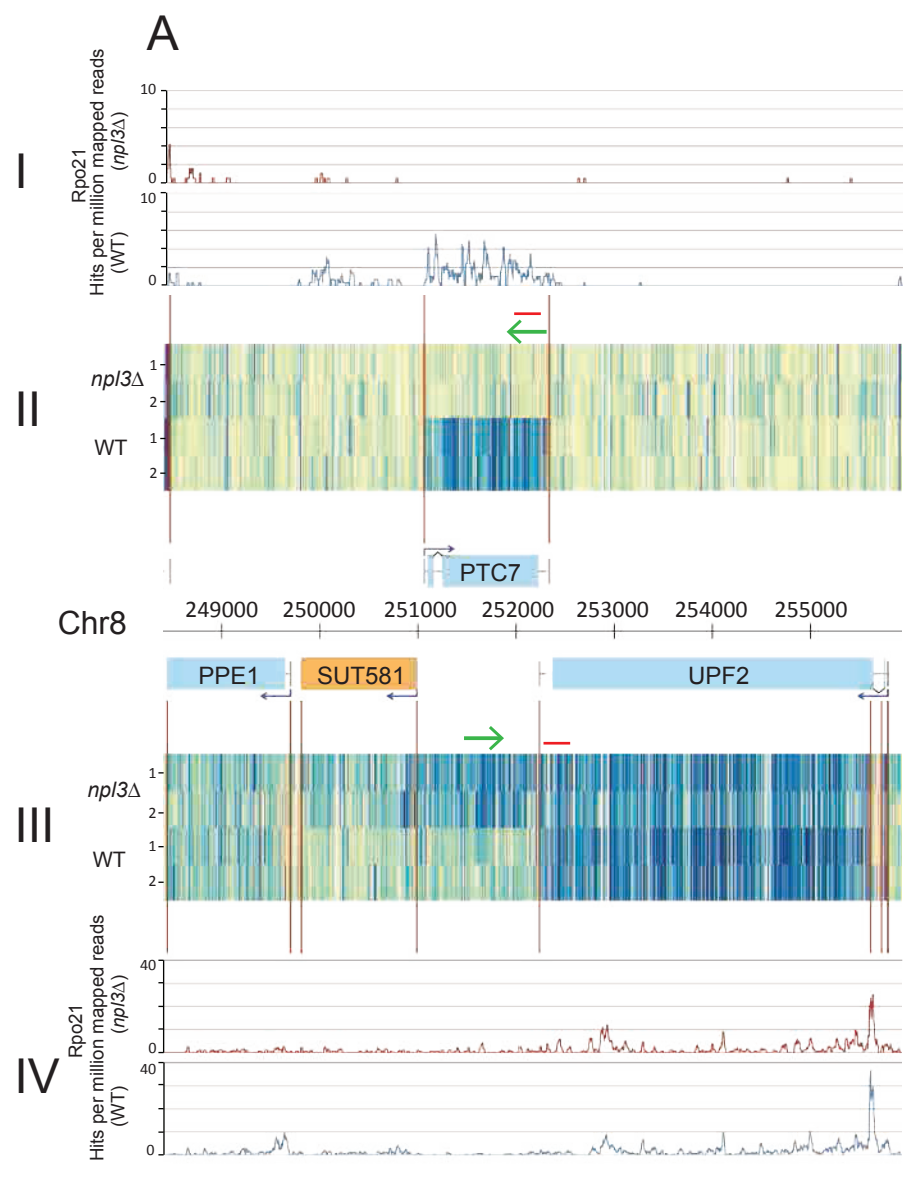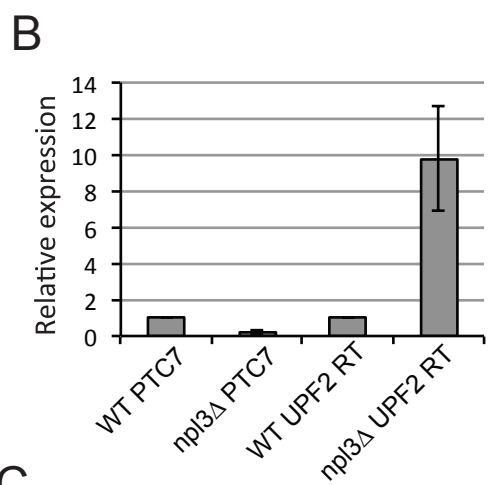

**C**

|             | Expression<br><i>np/3Δ/WT</i> | PoII<br><i>np/3Δ/WT</i> |
|-------------|-------------------------------|-------------------------|
| UPF2        | 0.7                           | 0.8                     |
| UPF2-SUT581 |                               | 1.8                     |
| SUT581      | 2.1                           | 0.5                     |
| PPE1        | 0.9                           | 0.4                     |
| PTC7        | 0.1                           | 0.0                     |

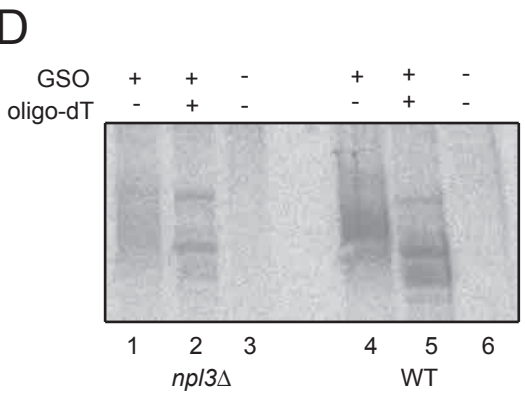

Supplement: pgen.1005735.s002.pdf [file pgen.1005735.s002.pdf]
