# Supplementary material for: Loss of the Yeast SR Protein Npl3 Alters Gene Expression Due to Transcription Readthrough
Source: PubMed Central journal article supplement (PMC4687934; doi:10.1371/journal.pgen.1005735), 2015-12-22

A

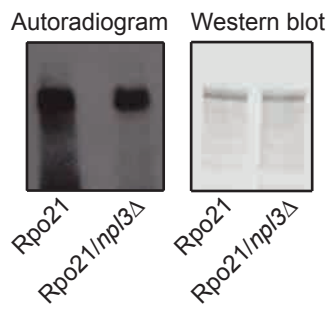

B

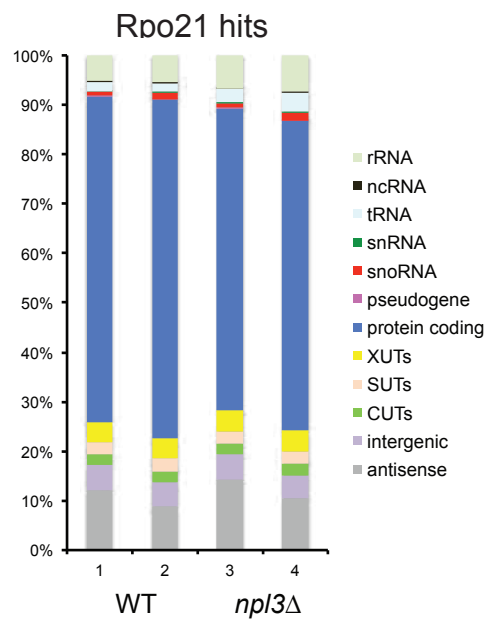

Supplement: pgen.1005735.s003.pdf [file pgen.1005735.s003.pdf]
