# Supplementary material for: Loss of the Yeast SR Protein Npl3 Alters Gene Expression Due to Transcription Readthrough
Source: PubMed Central journal article supplement (PMC4687934; doi:10.1371/journal.pgen.1005735), 2015-12-22

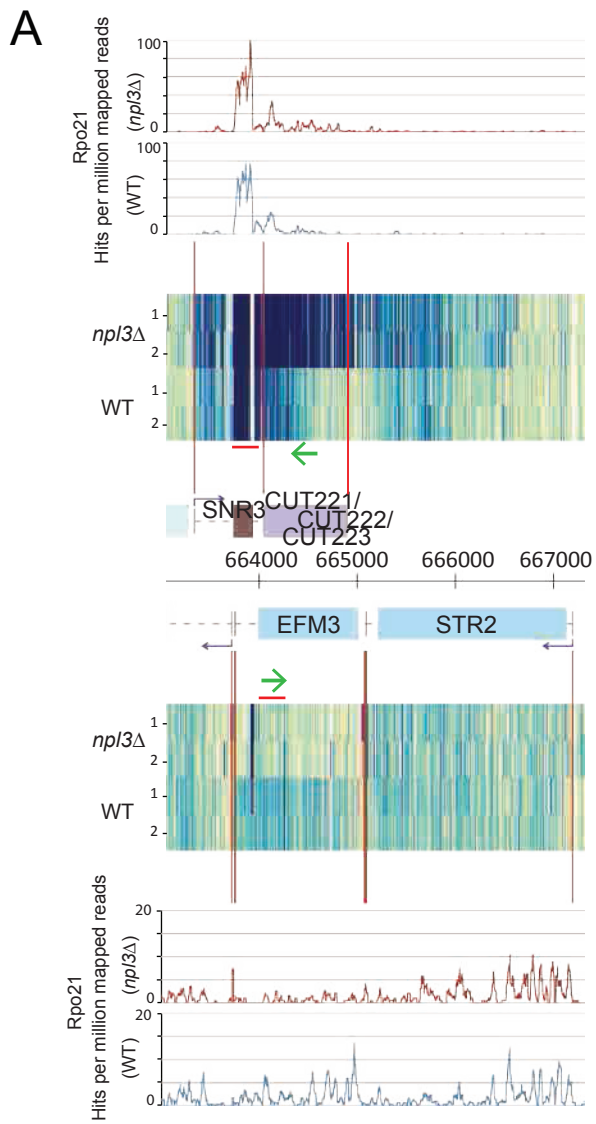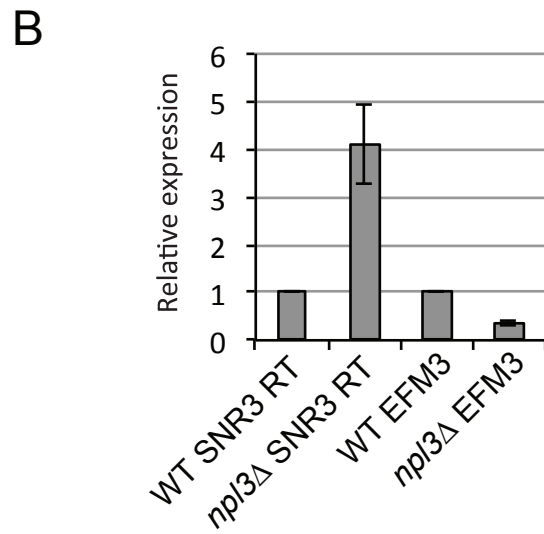

**C**

|        | Expression<br><i>np13Δ</i> /WT | PoII<br><i>np13Δ</i> /WT |
|--------|--------------------------------|--------------------------|
| SNR3   | 4.6                            | 1.1                      |
| CUT221 | 5.6                            | 1.3                      |
| CUT222 | 21.6                           | 2.5                      |
| CUT223 | 29.4                           | 7.0                      |
| EFM3   | 0.2                            | 0.4                      |

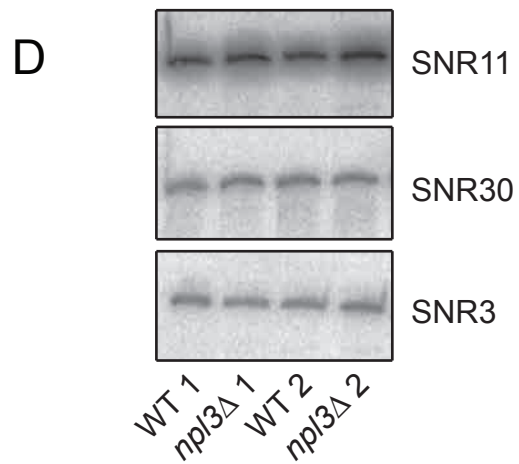

Supplement: pgen.1005735.s004.pdf [file pgen.1005735.s004.pdf]
