# Supplementary material for: Loss of the Yeast SR Protein Npl3 Alters Gene Expression Due to Transcription Readthrough
Source: PubMed Central journal article supplement (PMC4687934; doi:10.1371/journal.pgen.1005735), 2015-12-22

**A** Distribution of readthrough ratios

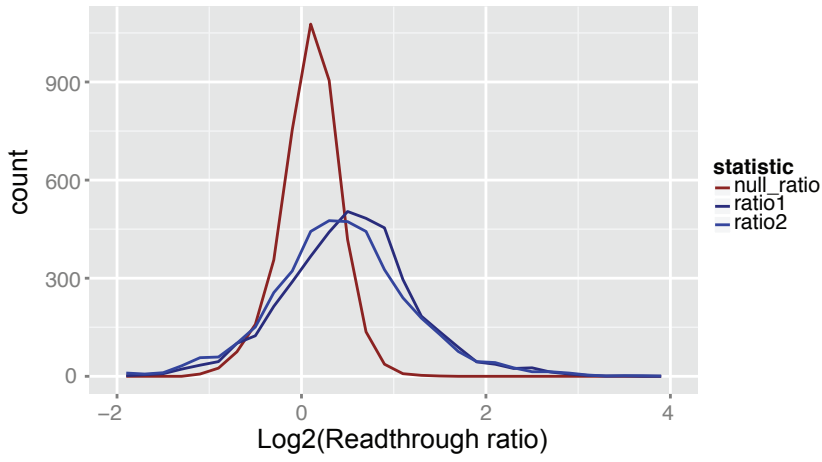

**B** Readthrough vs length

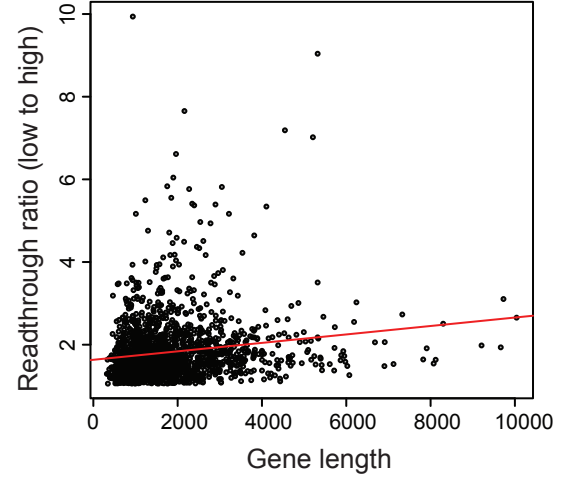

Supplement: pgen.1005735.s006.pdf [file pgen.1005735.s006.pdf]
