# Supplementary material for: Loss of the Yeast SR Protein Npl3 Alters Gene Expression Due to Transcription Readthrough
Source: PubMed Central journal article supplement (PMC4687934; doi:10.1371/journal.pgen.1005735), 2015-12-22
Supplement: pgen.1005735.s009.pdf [file pgen.1005735.s009.pdf]

Supplementary Table S3

| Gene      | Expression level <sup>a</sup> | Local transcription changes in mutant | Category |
|-----------|-------------------------------|---------------------------------------|----------|
| RPL13A    | 3.32                          | Increased intron signal               | intron   |
| FLX1      | 3.21                          | Upstream tandem RT                    | RT       |
| RPL31A    | 2.87                          | Increased intron signal               | intron   |
| GRE1      | 2.56                          | Upstream tandem RT                    | RT       |
| RPS21B    | 2.52                          | Increased intron signal               | Intron   |
| RPS30A    | 2.50                          | Increased intron signal               | Intron   |
| HSP12     | 2.49                          | UP                                    | UP       |
| INO1      | 2.36                          | Upstream tandem RT                    | RT       |
| RPS18B    | 2.27                          | Increased intron signal               | Intron   |
| RPL13B    | 2.24                          | Increased intron signal               | Intron   |
| INO1      | 2.24                          | Upstream tandem RT                    | RT       |
| DDR2      | 2.22                          | UP                                    | UP       |
| USE1      | 2.22                          | Upstream tandem RT                    | RT       |
| RPS27A    | 2.14                          | Increased intron signal               | Intron   |
| RPL24A    | 2.13                          | Increased intron signal               | Intron   |
| YSP3      | 2.01                          | Upstream tandem RT                    | RT       |
| AQY2      | 1.97                          | Upstream tandem RT                    | RT       |
| YDR124W   | 1.94                          | UP                                    | UP       |
| HSP26     | 1.91                          | Upstream tandem RT                    | RT       |
| PTH4      | 1.89                          | UP                                    | UP       |
| HES1      | 1.84                          | UP                                    | UP       |
| YPR145C-A | 1.79                          | Upstream tandem RT                    | RT       |
| RPS29A    | 1.78                          | Increased intron signal               | Intron   |
| RPL26B    | 1.74                          | Increased intron signal               | Intron   |
| ZPS1      | 1.72                          | Upstream tandem RT                    | RT       |
| SUL2      | 1.69                          | Upstream tandem RT                    | RT       |
| YNR062C   | 1.67                          | UP                                    | UP       |
| SWC5      | 1.65                          | UP                                    | UP       |
| RPL35B    | 1.63                          | Increased intron signal               | Intron   |
| IDP2      | 1.61                          | Upstream tandem RT                    | RT       |

<sup>a</sup> Expression determined as Log2 fold change in mutant relative to WT
