# Supplementary material for: Loss of the Yeast SR Protein Npl3 Alters Gene Expression Due to Transcription Readthrough
Source: PubMed Central journal article supplement (PMC4687934; doi:10.1371/journal.pgen.1005735), 2015-12-22
Supplement: pgen.1005735.s012.pdf [file pgen.1005735.s012.pdf]

Supplementary Table S6

|                                  | p-value  | FDR Q-value |
|----------------------------------|----------|-------------|
| <b>Process</b>                   |          |             |
| Transmembrane transport          | 9.55E-05 | 3.47E-01    |
| Single-organism cellular process | 2.71E-04 | 4.93E-01    |
| Adenine salvage                  | 4.92E-04 | 5.97E-01    |
| <b>Function</b>                  |          |             |
| Transporter activity             | 2.17E-05 | 3.23E-02    |
| Glucosidase activity             | 3.36E-05 | 2.50E-02    |
| Catalytic activity               | 5.06E-05 | 2.51E-02    |
| <b>Component</b>                 |          |             |
| Plasma membrane                  | 7.11E-06 | 5.58E-03    |
| Intrinsic component of membrane  | 3.06E-04 | 1.20E-01    |
| Integral component of membrane   | 7.33E-04 | 1.92E-01    |

GO term analysis looking for enrichment of categories in a list of mRNAs ranked by readthrough (high to low)
