# Supplementary material for: Loss of the Yeast SR Protein Npl3 Alters Gene Expression Due to Transcription Readthrough
Source: PubMed Central journal article supplement (PMC4687934; doi:10.1371/journal.pgen.1005735), 2015-12-22
Supplement: pgen.1005735.s013.pdf [file pgen.1005735.s013.pdf]

Supplementary Table S7: Strains and plasmids

| <b>Strain</b>             | <b>Genotype</b>                                                             | <b>Reference</b>           |
|---------------------------|-----------------------------------------------------------------------------|----------------------------|
| BY4741                    | <i>MATa; his3Δ1; leu2Δ0; met15Δ0; ura3Δ0</i>                                | Brachmann et al., 1998     |
| BY4727                    | <i>MATa; his3Δ200; leu2Δ0; lys2Δ0; met15Δ0; trp1Δ63; ura3Δ0</i>             | Brachmann et al., 1998     |
| N-PTH-NPL3                | <i>MATa; his3Δ200; leu2Δ0; lys2Δ0; met15Δ0; trp1Δ63; ura3Δ0; NPL3-N-HTP</i> | This study                 |
| <i>npl3Δ</i>              | <i>MATa; his3Δ1; leu2Δ0; met15Δ0; ura3Δ0; npl3::KAN</i>                     | This study                 |
| Nab3-C-HTP                | <i>MATa; his3Δ1; leu2Δ0; met15Δ0; ura3Δ0; NAB3-HTP-URA3</i>                 | Wlotzka et al.,            |
| Rpo21-C-HTP               | <i>MATa; his3Δ1; leu2Δ0; met15Δ0; ura3Δ0; RPO21-HTP-URA3</i>                | Milligan et al., submitted |
| Nab3-C-HTP/ <i>npl3Δ</i>  | <i>MATa; his3Δ1; leu2Δ0; met15Δ0; ura3Δ0; NAB3-HTP-URA3, npl3::NAT</i>      | This study                 |
| Rpo21-C-HTP/ <i>npl3Δ</i> | <i>MATa; his3Δ1; leu2Δ0; met15Δ0; ura3Δ0; RPO21-HTP-URA3, npl3::NAT</i>     | This study                 |
| <b>Plasmid</b>            | <b>Genotype</b>                                                             | <b>Reference</b>           |
| pRS415-NPL3-PTH           | pRS415; N-terminally PTH tagged Npl3 under Met promoter                     | Granneman et al., 2009     |
