# Supplementary material for: Loss of the Yeast SR Protein Npl3 Alters Gene Expression Due to Transcription Readthrough
Source: PubMed Central journal article supplement (PMC4687934; doi:10.1371/journal.pgen.1005735), 2015-12-22
Supplement: pgen.1005735.s014.pdf [file pgen.1005735.s014.pdf]

## Supplementary Table S8: Oligonucleotides

### Strain construction

#### NPL3 URA3 integration

NPL3-URA3-fwd

AAAAAGGACATGAGAAAAATAATTCCTCTCTTCTAAATATATATACTTTTGAAGGAATCAAATTA  
GGATTGACTGAGAGTGCACCA

NPL3-URA3-rev

GAGCTGTGGTGGTCTTGGTGCTGTTCTCGACTGGGCATCGACAACAGATTCTGGTAGTTGCTCT  
ACTGTGCGGTATTTACACCGC

#### PTH URA3 replacement

NPL3(promoter)-PTH-fwd

GGATTTAAAAAGGACATGAGAAAAATAATTCCTCTCTTCTAAATATATATACTTTTGAAGGAATCAA  
AATTAAGCAATTACGCTAAAACCATAAGGATAATGAACAAATTCACAAAGA

NPL3-rev

GCCATGAACAACCTTCTGGT

#### NPL3 deletion

NPL3-KO-fwd

AAGGAATCAAATTAAGCAATTACGCTAAAACCATAAGGACGGATCCCCGGGTTAATTA

Npl3-KO-rev

TGTTTTCTTTTTCATTTGTTCTCAGTCTCATATTTAAGGAATTCGAGCTCGTTAAAC

### Oligonucleotides for CRAC

#### 5' linkers (3 random nucleotides, plus barcodes), IDT:

L5Ad 5'-invddT-ACACrGrArCrGrCrUrCrUrUrCrCrGrArUrCrUrNrNrNrCrGrCrUrUrArGrC-OH-3'  
L5Bb 5'-invddT-ACACrGrArCrGrCrUrCrUrUrCrCrGrArUrCrUrNrNrNrGrUrGrArGrC-OH-3'  
L5Bc 5'-invddT-ACACrGrArCrGrCrUrCrUrUrCrCrGrArUrCrUrNrNrNrCrArCrUrArGrC-OH-3'  
L5Bd 5'-invddT-ACACrGrArCrGrCrUrCrUrUrCrCrGrArUrCrUrNrNrNrUrCrUrCrUrArGrC-OH-3'  
L5Ca 5'-invddT-ACACrGrArCrGrCrUrCrUrUrCrCrGrArUrCrUrNrNrNrCrUrArGrC-OH-3'  
L5Cb 5'-invddT-ACACrGrArCrGrCrUrCrUrUrCrCrGrArUrCrUrNrNrNurGrGrArGrC-OH-3'  
L5Cc 5'-invddT-ACACrGrArCrGrCrUrCrUrUrCrCrGrArUrCrUrNrNrNrArCrUrCrArGrC-OH-3'  
L5Cd 5'-invddT-ACACrGrArCrGrCrUrCrUrUrCrCrGrArUrCrUrNrNrNrGrArCrUrUrArGrC-OH-3'

#### 3' linker (pre-activated, adenylated linker for cloning), IDT:

miRCat-33<sup>TM</sup> 3'-L

rAppTGGAATTCTCGGGTGCCAAGG/ddC/

#### RT and PCR primers

miRCat-33<sup>TM</sup> RT

CCTGGCACCCGAGAATT

PCR fwd

AATGATACGGCGACCACCGAGATCTACACTCTTCCCTACACGACGCTCTCCGATCT

PCR rev

CAAGCAGAAGACGGCATAACGAGATCGGTCTCGGCATTCTGGCCTTGGCACCCGAGAATTCC

### Strand-specific RT-QPCRs

#### Reverse transcription primers

|         |                       |
|---------|-----------------------|
| VHR2_RT | CTGAAGAACTGGGCCTTGTC  |
| THO1    | GAGCGGTTGTTGCATTTTT   |
| UPF2_RT | TTTAAACACCCCCAGAGACG  |
| PTC7    | ACCACCGCTGTAGTTTTTGC  |
| CYC1    | CCTTCTTCAACCCACCAAAG  |
| SNR3_RT | TTGAGACGCAGCTGAAAAGA  |
| EFM3    | TCGTTGTTGCGTCGTACTION |

### QPCR primers

|          |                      |
|----------|----------------------|
| VHR2 fwd | AATGAGGCCACACTCCACAT |
| VHR2 rev | CTATCTGCCGATGTGCTTGA |
| THO1 fwd | GAAACAAACGAACCCAAGGA |
| THO1 rev | GATCCAATGCTTTGGCCTTA |
| UPF2 fwd | GGTGATCTTGACGCAGACAG |
| UPF2 rev | CTCCGCTTTCCTTCTTCC   |
| PTC7 fwd | ACGCTTTTAACGCCAAAGAA |
| PTC7 rev | GATGGGAAGTGAGCCACAAT |
| CYC1 fwd | CTCTGGTCAAGCTGAAGGGT |
| CYC1 rev | TTCTTCAACCCACCAAAGGC |
| SNR3 fwd | CCACCGCATTAGACAGTACG |
| SNR3 rev | ACCCGGAAATTGATCTCTCC |
| EFM3 fwd | AGACCACGAATGGATTTTCG |
| EFM3 rev | CGTCTTTCATCATCGGGTCT |
| ACT1 fwd | GTTACGTCGCCTTGGACTTC |
| ACT1 rev | TGGGGCTCTGAATCTTTCGT |

### **Northern probe**

|       |                      |
|-------|----------------------|
| SNR60 | GCGAAAGACTAATTTGATGG |
|-------|----------------------|
