# Supplementary material for: Loss of the Yeast SR Protein Npl3 Alters Gene Expression Due to Transcription Readthrough
Source: PLoS Genet. 2015 Dec 22;11(12):e1005735. doi: 10.1371/journal.pgen.1005735 (PMC4687934; doi:10.1371/journal.pgen.1005735)
Supplement: S2 Table — Differences in gene expression between WT and npl3Δ yeast were determined using Limma. Those with significantly altered expression (adj p-value <0.05) show TRUE in column L (threshold). (XLSX) [file pgen.1005735.s008.xlsx]

## Sheet: Sheet1
	tx_ID	type	name	commonName	logFC	AveExpr	t	P.Value	adj.P.Val	B	threshold	threshold_desc
1	ST0001	SUTs	SUT001	SUT001	1.08595	-5.86767	3.47043	0.0112135	0.0420984	-3.37084	TRUE	s
2	ST0002	CUTs	CUT001	CUT001	1.19169	-5.48	4.81197	0.00221229	0.0169152	-1.61102	TRUE	s
3	ST0003	ORF-T	YAL062W	GDH3	-0.814791	-5.99443	-4.80637	0.0022261	0.0169152	-1.61782	TRUE	s
4	ST0004	ORF-T	YAL061W	BDH2	-0.482658	-4.4848	-2.09083	0.0768105	0.151991	-5.37507	FALSE	ns
5	ST0005	ORF-T	YAL060W	BDH1	-1.45927	-2.94846	-7.66255	0.000152627	0.00407256	1.31135	TRUE	s
6	ST0006	ORF-T	YAL059W	ECM1	-0.274864	-3.21657	-1.31226	0.232751	0.34234	-6.42064	FALSE	ns
7	ST0007	ORF-T	YAL058W	CNE1	-1.06347	-4.07872	-5.7483	0.000829329	0.00974294	-0.537489	TRUE	s
8	ST0008	ORF-T	YAL056W	GPB2	-0.442428	-4.1709	-2.31281	0.0557275	0.121013	-5.05221	FALSE	ns
9	ST0009	ORF-T	YAL055W	PEX22	-0.0611325	-5.18214	-0.345971	0.740012	0.806407	-7.22903	FALSE	ns
10	ST0010	SUTs	SUT002	SUT002	1.0781	-4.4165	5.62024	0.000942108	0.0104756	-0.677104	TRUE	s
11	ST0011	ORF-T	YAL053W	FLC2	-0.142767	-1.52132	-0.764127	0.470933	0.581134	-6.97663	FALSE	ns
12	ST0012	ORF-T	YAL051W	OAF1	-0.386259	-4.00056	-2.04951	0.0815469	0.158602	-5.43453	FALSE	ns
13	ST0013	ORF-T	YAL044W-A	YAL044W-A	-0.52048	-2.76358	-1.62812	0.149605	0.245749	-6.02047	FALSE	ns
14	ST0014	ORF-T	YAL042W	ERV46	-0.516732	-0.69691	-3.03411	0.0201365	0.0609627	-3.99453	FALSE	ns
15	ST0015	ORF-T	YAL041W	CDC24	-0.304646	-2.78303	-1.61214	0.153045	0.250043	-6.0417	FALSE	ns
16	ST0016	SUTs	SUT003	SUT003	1.25287	-4.52968	4.71542	0.00246443	0.0176391	-1.72888	TRUE	s
17	ST0017	ORF-T	YAL038W	CDC19	0.0253255	1.81814	0.136322	0.895587	0.927744	-7.28631	FALSE	ns
18	ST0018	ORF-T	YAL037W	YAL037W	0.24206	-5.4756	1.05459	0.32828	0.445299	-6.70842	FALSE	ns
19	ST0019	ORF-T	YAL035W	FUN12	-0.599055	-1.12051	-3.30707	0.0139177	0.0480121	-3.60198	TRUE	s
20	ST0020	ORF-T	YAL034W-A	MTW1	-0.388427	-5.94175	-1.64744	0.145542	0.240924	-5.99468	FALSE	ns
21	ST0021	ORF-T	YAL033W	POP5	0.148515	-3.05467	0.524729	0.616739	0.708855	-7.14252	FALSE	ns
22	ST0022	ORF-T	YAL030W	SNC1	-0.219781	-2.64958	-0.793216	0.454917	0.566659	-6.95288	FALSE	ns
23	ST0023	ORF-T	YAL028W	FRT2	0.027956	-4.94185	0.117723	0.909751	0.936804	-7.289	FALSE	ns
24	ST0024	ORF-T	YAL027W	YAL027W	0.443993	-4.58302	1.89129	0.102524	0.186099	-5.65949	FALSE	ns
25	ST0025	other	YAL019W-A, YAL019W	YAL019W-A, FUN30	-0.454163	-3.1651	-2.59357	0.0372755	0.0921058	-4.63952	FALSE	ns
26	ST0026	ORF-T	YAL017W	PSK1	-0.397338	-3.16694	-2.2093	0.0647098	0.134731	-5.20337	FALSE	ns
27	ST0027	ORF-T	YAL016W	TPD3	-0.602059	-1.859	-3.39008	0.0124646	0.0449617	-3.48414	TRUE	s
28	ST0028	ORF-T	YAL013W	DEP1	-0.13908	-4.57767	-0.735776	0.486909	0.594294	-6.99907	FALSE	ns
29	ST0029	ORF-T	YAL012W	CYS3	0.0276391	0.835359	0.163284	0.875128	0.913439	-7.2817	FALSE	ns
30	ST0030	ORF-T	YAL011W	SWC3	-0.256426	-5.14402	-0.767679	0.468957	0.579548	-6.97377	FALSE	ns
31	ST0031	ORF-T	YAL009W	SPO7	0.0855027	-4.04402	0.371835	0.721537	0.79296	-7.21861	FALSE	ns
32	ST0032	ORF-T	YAL008W	FUN14	-0.425814	-3.43827	-2.48382	0.0435907	0.102619	-4.80107	FALSE	ns
33	ST0033	CUTs	CUT002	CUT002	1.34238	-5.67866	7.69485	0.000148776	0.00404744	1.33912	TRUE	s
34	ST0034	ORF-T	YAL003W, snR18	EFB1, SNR18	-0.115002	1.17494	-0.679501	0.519679	0.623923	-7.04145	FALSE	ns
35	ST0035	CUTs	CUT003	CUT003	1.37978	-5.65421	6.74279	0.000328574	0.00609538	0.475528	TRUE	s
36	ST0036	ORF-T	YAL002W	VPS8	-0.28935	-3.53879	-1.62565	0.150132	0.246391	-6.02376	FALSE	ns
37	ST0037	ORF-T	YAR002W	NUP60	-0.42979	-2.90643	-2.34665	0.0530756	0.11735	-5.00261	FALSE	ns
38	ST0038	ORF-T	YAR003W	SWD1	-0.398755	-3.74992	-2.28263	0.0582065	0.125076	-5.09637	FALSE	ns
39	ST0039	ORF-T	YAR008W	SEN34	-0.147962	-4.16941	-0.863219	0.41795	0.531723	-6.89273	FALSE	ns
40	ST0040	ORF-T	YAR015W	ADE1	-0.444646	-2.09535	-2.54386	0.0400088	0.0966913	-4.7127	FALSE	ns
41	ST0041	CUTs	CUT004	CUT004	1.54296	-5.5559	5.05559	0.00169471	0.0146888	-1.31972	TRUE	s
42	ST0042	other	YAR019W-A	YAR019W-A	0.0560832	-5.03716	0.321881	0.757387	0.8207	-7.23809	FALSE	ns
43	ST0043	CUTs	CUT005	CUT005	0.625737	-5.60435	1.59996	0.155718	0.253556	-6.05783	FALSE	ns
44	ST0044	ORF-T	YAR028W, YAR029W	YAR028W, YAR029W	-0.337881	-4.46956	-1.2645	0.248408	0.360348	-6.47698	FALSE	ns
45	ST0045	ORF-T	YAR035W	YAT1	0.0396226	-6.19604	0.232033	0.823464	0.874322	-7.26624	FALSE	ns
46	ST0046	ORF-T	YAR042W	SWH1	-0.175049	-3.35464	-0.929612	0.384957	0.502046	-6.83197	FALSE	ns
47	ST0047	SUTs	SUT004	SUT004	-0.17658	-3.92941	-0.593363	0.572484	0.670064	-7.10058	FALSE	ns
48	ST0048	ORF-T	YBL102W	SFT2	-0.748239	-2.05195	-3.76046	0.00771613	0.0339929	-2.96871	TRUE	s
49	ST0049	ORF-T	YBL099W	ATP1	-0.866007	0.0357507	-5.08804	0.0016366	0.0144659	-1.28156	TRUE	s
50	ST0050	ORF-T	YBL098W	BNA4	-0.853205	-3.86777	-4.46186	0.00329296	0.0206414	-2.04497	TRUE	s
51	ST0051	ORF-T	YBL097W	BRN1	-0.412664	-5.04591	-2.10212	0.0755656	0.150428	-5.35879	FALSE	ns
52	ST0052	ORF-T	YBL095W	YBL095W	-0.64837	-4.24418	-3.4636	0.0113144	0.0423218	-3.38045	TRUE	s
53	ST0053	ORF-T	YBL092W	RPL32	-0.136758	1.5401	-0.78204	0.461025	0.572303	-6.96209	FALSE	ns
54	ST0054	SUTs	SUT005	SUT005	-0.291673	-3.70103	-1.30094	0.236383	0.346637	-6.43411	FALSE	ns
55	ST0055	ORF-T	YBL090W	MRP21	-0.0591338	-3.70665	-0.261088	0.801895	0.857052	-7.25811	FALSE	ns
56	ST0056	ORF-T	YBL089W	AVT5	-0.29484	-2.80191	-1.46409	0.188613	0.292201	-6.23377	FALSE	ns
57	ST0057	ORF-T	YBL085W	BOI1	-0.361684	-3.13914	-1.85939	0.107357	0.192244	-5.70423	FALSE	ns
58	ST0058	ORF-T	YBL081W	YBL081W	-0.107921	-0.248915	-0.59575	0.57098	0.668809	-7.09904	FALSE	ns
59	ST0059	ORF-T	YBL079W	NUP170	-0.902639	-2.61236	-5.18027	0.00148327	0.01367	-1.17395	TRUE	s
60	ST0060	other	snR56	SNR56	0.993207	-1.40357	3.36963	0.0128068	0.0457097	-3.5131	TRUE	s
61	ST0061	ORF-T	YBL071W-A	KTI11	-0.0800367	-2.94748	-0.356606	0.732391	0.800413	-7.22483	FALSE	ns
62	ST0062	ORF-T	YBL069W, YBL068W-A	AST1, YBL068W-A	-0.957869	-3.77011	-4.84357	0.00213611	0.01665	-1.57274	TRUE	s
63	ST0063	ORF-T	YBL068W	PRS4	-0.647751	-2.08181	-3.37584	0.0127019	0.0454791	-3.50431	TRUE	s
64	ST0064	CUTs	CUT006	CUT006	-0.0914488	-6.02663	-0.332726	0.749545	0.81463	-7.23409	FALSE	ns
65	ST0065	ORF-T	YBL063W	KIP1	-0.621213	-4.86671	-3.11134	0.0181197	0.0568512	-3.88275	FALSE	ns
66	ST0066	ORF-T	YBL060W	YEL1	-0.136399	-4.89326	-0.806882	0.447525	0.559368	-6.94146	FALSE	ns
67	ST0067	ORF-T	YBL059W	YBL059W	-0.00805695	-4.92632	-0.0289551	0.977747	0.985869	-7.29645	FALSE	ns
68	ST0068	ORF-T	YBL058W	SHP1	-0.604611	-2.57585	-3.54649	0.0101541	0.0398923	-3.26433	TRUE	s
69	ST0069	ORF-T	YBL056W	PTC3	-0.767203	-1.46404	-4.20925	0.0044368	0.0248459	-2.36937	TRUE	s
70	ST0070	other	YBL054W, YBL053W	YBL054W, YBL053W	-0.263454	-2.51663	-1.46049	0.189564	0.293425	-6.23832	FALSE	ns
71	ST0071	ORF-T	YBL050W	SEC17	-0.211723	-2.54079	-1.04424	0.332709	0.449333	-6.71908	FALSE	ns
72	ST0072	other	YBL049W, YBL048W	MOH1, YBL048W	1.51108	-5.30214	6.92526	0.000280425	0.00558699	0.648578	TRUE	s
73	ST0073	ORF-T	YBL046W	PSY4	-0.0253991	-4.11782	-0.129392	0.900859	0.930679	-7.28736	FALSE	ns
74	ST0074	ORF-T	YBL043W	ECM13	0.0865472	-4.86323	0.368492	0.723914	0.794611	-7.22	FALSE	ns
75	ST0075	ORF-T	YBL041W	PRE7	-0.182787	-1.14134	-0.987706	0.357737	0.47524	-6.77598	FALSE	ns
76	ST0076	ORF-T	YBL039W-B	YBL039W-B	-0.108737	-3.91409	-0.486704	0.64204	0.729758	-7.16372	FALSE	ns
77	ST0077	ORF-T	YBL038W	MRPL16	-0.571072	-3.65547	-2.75311	0.0297498	0.0792006	-4.40492	FALSE	ns
78	ST0078	ORF-T	YBL037W	APL3	-0.620077	-3.96722	-2.95007	0.0226067	0.0652625	-4.11672	FALSE	ns
79	ST0079	ORF-T	YBL032W	HEK2	-1.23409	-1.93134	-6.90553	0.000285225	0.00559099	0.630049	TRUE	s
80	ST0080	ORF-T	YBL031W	SHE1	-0.151422	-4.35677	-0.558507	0.594726	0.689439	-7.12247	FALSE	ns
81	ST0081	SUTs	SUT006	SUT006	0.874772	-5.1798	4.77799	0.0022976	0.0170491	-1.65235	TRUE	s
82	ST0082	ORF-T	YBL029W	YBL029W	-1.03116	-5.67772	-4.72084	0.00244944	0.0176098	-1.72222	TRUE	s
83	ST0083	ORF-T	YBL027W	RPL19B	1.14013	-4.63194	5.05871	0.00168902	0.014657	-1.31604	TRUE	s
84	ST0084	ORF-T	YBL026W	LSM2	-0.614531	-1.70535	-3.05417	0.0195905	0.0597828	-3.96545	FALSE	ns
85	ST0085	ORF-T	YBL025W	RRN10	-0.261544	-4.68399	-1.08915	0.31384	0.429558	-6.67228	FALSE	ns
86	ST0086	ORF-T	YBL024W	NCL1	-0.869303	-1.84221	-4.75585	0.00235513	0.0172999	-1.67936	TRUE	s
87	ST0087	ORF-T	YBL020W	RFT1	-0.340017	-2.13298	-1.63557	0.148026	0.244037	-6.01054	FALSE	ns
88	ST0088	ORF-T	YBL019W	APN2	-0.323684	-5.57122	-1.56597	0.163407	0.262606	-6.10252	FALSE	ns
89	ST0089	CUTs	CUT007	CUT007	0.933242	-4.07176	3.10012	0.0183986	0.0573738	-3.89895	FALSE	ns
90	ST0090	ORF-T	YBL015W	ACH1	-0.683013	-3.84801	-3.17516	0.0166163	0.0539917	-3.79077	FALSE	ns
91	ST0091	SUTs	SUT007	SUT007	0.464433	-6.24475	1.35648	0.219033	0.327401	-6.36739	FALSE	ns
92	ST0092	ORF-T	YBL013W	FMT1	-0.736037	-5.18169	-2.72544	0.0309307	0.0813483	-4.44556	FALSE	ns
93	ST0093	ORF-T	YBL011W	SCT1	-0.605042	-2.90091	-3.20479	0.0159645	0.052531	-3.74821	FALSE	ns
94	ST0094	ORF-T	YBL009W	ALK2	-0.564418	-3.76253	-3.14503	0.0173087	0.0553513	-3.83415	FALSE	ns
95	ST0095	other	YBL008W-A, YBL008W	YBL008W-A, HIR1	-0.172615	-4.62102	-1.01887	0.343764	0.460802	-6.7449	FALSE	ns
96	ST0096	other	YBL006W-A	YBL006W-A	-0.358839	-5.65523	-1.1207	0.301109	0.417159	-6.63857	FALSE	ns
97	ST0097	other	YBL005W, YBLWdelta8	PDR3, YBLWdelta8	-0.430992	-3.51945	-1.89215	0.102397	0.186064	-5.65828	FALSE	ns
98	ST0098	ORF-T	YBL004W	UTP20	-0.965716	-1.68471	-5.38147	0.00120152	0.0120516	-0.94339	TRUE	s
99	ST0099	ORF-T	YBL002W	HTB2	-0.499334	0.648497	-2.91461	0.0237443	0.0675806	-4.16844	FALSE	ns
100	ST0100	CUTs	CUT008	CUT008	0.0528595	-6.5089	0.143093	0.89044	0.924116	-7.28523	FALSE	ns
101	ST0101	SUTs	SUT008	SUT008	-0.262182	-5.90497	-0.895157	0.401827	0.517734	-6.86395	FALSE	ns
102	ST0102	SUTs	SUT009	SUT009	-0.185489	-6.05496	-0.797689	0.452488	0.564116	-6.94916	FALSE	ns
103	ST0103	ORF-T	YBR003W	COQ1	-0.695834	-3.29301	-3.98757	0.00580931	0.0286215	-2.6618	TRUE	s
104	ST0104	ORF-T	YBR005W	RCR1	-0.15625	-2.68934	-0.694618	0.510739	0.616857	-7.03035	FALSE	ns
105	ST0105	ORF-T	YBR006W	UGA2	-0.345882	-4.26597	-1.6577	0.143428	0.238638	-5.98093	FALSE	ns
106	ST0106	SUTs	SUT010	SUT010	0.190822	-4.77027	0.455462	0.663221	0.747279	-7.18002	FALSE	ns
107	ST0107	SUTs	SUT011	SUT011	-0.644773	-4.47556	-1.61242	0.152984	0.25	-6.04133	FALSE	ns
108	ST0108	CUTs	CUT009	CUT009	0.498931	-4.72072	1.37104	0.214676	0.322634	-6.34964	FALSE	ns
109	ST0109	ORF-T	YBR010W	HHT1	-0.367477	0.080597	-1.2849	0.241611	0.352456	-6.45307	FALSE	ns
110	ST0110	SUTs	SUT012	SUT012	0.64832	-5.57775	1.79554	0.117707	0.206207	-5.79305	FALSE	ns
111	ST0111	ORF-T	YBR016W	YBR016W	0.190252	-1.22667	1.00069	0.351863	0.469065	-6.76312	FALSE	ns
112	ST0112	SUTs	SUT013	SUT013	-0.121556	-3.38806	-0.680945	0.51882	0.623305	-7.0404	FALSE	ns
113	ST0113	ORF-T	YBR020W	GAL1	-0.248105	-5.13147	-1.18904	0.274995	0.388908	-6.56335	FALSE	ns
114	ST0114	ORF-T	YBR021W	FUR4	-0.697726	-3.372	-3.76127	0.00770824	0.0339929	-2.9676	TRUE	s
115	ST0115	ORF-T	YBR022W	POA1	-1.88878	-4.80854	-4.06017	0.00531416	0.0273474	-2.56524	TRUE	s
116	ST0116	ORF-T	YBR024W	SCO2	-0.265842	-4.42849	-1.47028	0.186986	0.290538	-6.22592	FALSE	ns
117	ST0117	CUTs	CUT010	CUT010	-0.122463	-5.92481	-0.268928	0.796107	0.852997	-7.25576	FALSE	ns
118	ST0118	ORF-T	YBR030W	YBR030W	-0.766914	-4.16041	-4.41675	0.00347064	0.0212983	-2.10221	TRUE	s
119	ST0119	ORF-T	YBR031W	RPL4A	-0.177811	1.84827	-0.936902	0.381457	0.498733	-6.82509	FALSE	ns
120	ST0120	other	YBR032W, YBR033W	YBR032W, EDS1	1.02213	-6.0913	6.05568	0.000615596	0.00830541	-0.211185	TRUE	s
121	ST0121	CUTs	CUT011	CUT011	1.80706	-3.71574	6.32278	0.000479366	0.00743273	0.062558	TRUE	s
122	ST0122	CUTs	CUT012	CUT012	2.87359	-4.43055	14.2662	3.01034403765448e-06	0.000509098	5.448	TRUE	s
123	ST0123	other	TLC1	TLC1	-0.262883	-0.0787153	-1.50745	0.177477	0.279777	-6.17843	FALSE	ns
124	ST0124	CUTs	CUT013	CUT013	0.398076	-6.25124	1.53385	0.170996	0.271833	-6.14436	FALSE	ns
125	ST0125	ORF-T	YBR038W	CHS2	-0.576893	-2.07811	-3.32298	0.0136256	0.0472439	-3.57933	TRUE	s
126	ST0126	ORF-T	YBR039W	ATP3	-0.348007	-1.37958	-1.7523	0.125257	0.216051	-5.85259	FALSE	ns
127	ST0127	ORF-T	YBR041W	FAT1	-0.461665	-2.0466	-2.42714	0.0472778	0.108217	-4.88443	FALSE	ns
128	ST0128	CUTs	CUT014	CUT014	0.759564	-6.08721	1.97916	0.0902894	0.170276	-5.53512	FALSE	ns
129	ST0129	CUTs	CUT015	CUT015	0.799045	-4.1298	3.50502	0.0107176	0.0409327	-3.32232	TRUE	s
130	ST0130	ORF-T	YBR047W	FMP23	-0.522488	-5.31292	-2.07708	0.0783554	0.153958	-5.39489	FALSE	ns
131	ST0131	ORF-T	YBR048W	RPS11B	0.902171	-2.80855	4.67355	0.00258359	0.0179319	-1.78042	TRUE	s
132	ST0132	CUTs	CUT016	CUT016	1.71103	-5.0043	5.28119	0.00133365	0.0128035	-1.05759	TRUE	s
133	ST0133	CUTs	CUT017	CUT017	0.935605	-4.86123	4.92646	0.00194984	0.0157898	-1.47304	TRUE	s
134	ST0134	ORF-T	YBR054W	YRO2	-4.21809	-3.29345	-15.818	1.5378453263393e-06	0.000385628	6.11292	TRUE	s
135	ST0135	ORF-T	YBR056W	YBR056W	-0.0763824	-3.20142	-0.399959	0.701675	0.776703	-7.20646	FALSE	ns
136	ST0136	other	YBR056W-A	YBR056W-A	1.20513	-2.1183	5.03953	0.0017243	0.0148042	-1.33865	TRUE	s
137	ST0137	CUTs	CUT018	CUT018	-0.632862	-5.6438	-2.4867	0.0434114	0.102496	-4.79683	FALSE	ns
138	ST0138	SUTs	SUT014	SUT014	0.00837285	-4.07561	0.0436428	0.966466	0.977265	-7.29584	FALSE	ns
139	ST0139	CUTs	CUT019	CUT019	2.27063	-4.59621	12.7407	6.25416294748372e-06	0.000800241	4.7057	TRUE	s
140	ST0140	CUTs	CUT020	CUT020	0.0854014	-6.27805	0.447285	0.668821	0.751494	-7.18412	FALSE	ns
141	ST0141	SUTs	SUT015	SUT015	0.372077	-5.10761	0.739296	0.484906	0.593143	-6.99632	FALSE	ns
142	ST0142	SUTs	SUT016	SUT016	0.405819	-5.70114	2.02099	0.0849853	0.163452	-5.47542	FALSE	ns
143	ST0143	CUTs	CUT021	CUT021	0.290623	-4.96552	1.6127	0.152924	0.249958	-6.04096	FALSE	ns
144	ST0144	CUTs	CUT022	CUT022	0.996189	-5.73394	5.16987	0.00149973	0.0137331	-1.18602	TRUE	s
145	ST0145	ORF-T	YBR071W	YBR071W	0.0848729	-2.74748	0.494068	0.637098	0.725767	-7.15973	FALSE	ns
146	ST0146	CUTs	CUT023	CUT023	2.64951	-4.3873	9.33957	4.50282498116184e-05	0.00215801	2.62983	TRUE	s
147	ST0147	ORF-T	YBR072W	HSP26	1.91132	-2.81402	8.20365	0.000100616	0.00308726	1.76344	TRUE	s
148	ST0148	ORF-T	YBR073W	RDH54	-0.395749	-3.39836	-1.88604	0.103304	0.186965	-5.66686	FALSE	ns
149	ST0149	ORF-T	YBR074W	YBR074W	-0.557638	-2.21716	-3.26222	0.0147781	0.0499799	-3.66596	TRUE	s
150	ST0150	ORF-T	YBR078W	ECM33	-0.37371	1.08524	-2.03423	0.0833713	0.161372	-5.45645	FALSE	ns
151	ST0151	ORF-T	YBR083W	TEC1	1.11924	-3.15377	6.36532	0.00046098	0.00728148	0.105346	TRUE	s
152	ST0152	ORF-T	YBR084W	MIS1	-1.24529	-1.99788	-7.36682	0.000193655	0.0046224	1.05229	TRUE	s
153	ST0153	ORF-T	YBR085W	AAC3	0.128175	-4.44062	0.728778	0.490908	0.598371	-7.0045	FALSE	ns
154	ST0154	CUTs	CUT024	CUT024	-0.498361	-5.49806	-2.33196	0.0542103	0.118812	-5.02414	FALSE	ns
155	ST0155	ORF-T	YBR087W	RFC5	-0.488396	-3.17523	-2.61382	0.0362187	0.0902304	-4.60972	FALSE	ns
156	ST0156	CUTs	CUT025	CUT025	0.818224	-4.16016	3.76553	0.00766677	0.0339129	-2.96178	TRUE	s
157	ST0157	ORF-T	YBR094W	PBY1	-0.615926	-3.59786	-3.14697	0.0172631	0.0553425	-3.83135	FALSE	ns
158	ST0158	ORF-T	YBR096W	YBR096W	-0.417635	-1.22862	-2.00065	0.0875246	0.166443	-5.50449	FALSE	ns
159	ST0159	ORF-T	YBR097W	VPS15	-0.719791	-4.45334	-3.90079	0.00646884	0.0309521	-2.77821	TRUE	s
160	ST0160	ORF-T	YBR098W	MMS4	0.00186985	-5.54427	0.00862767	0.993368	0.995606	-7.29688	FALSE	ns
161	ST0161	ORF-T	YBR103W	SIF2	-0.0425132	-4.2932	-0.246704	0.812551	0.866118	-7.26225	FALSE	ns
162	ST0162	ORF-T	YBR104W	YMC2	-0.798177	-3.65275	-4.19238	0.00452755	0.0250705	-2.39137	TRUE	s
163	ST0163	ORF-T	YBR106W	PHO88	-0.629703	0.0631023	-3.59548	0.00952965	0.0383095	-3.19611	TRUE	s
164	ST0164	SUTs	SUT017	SUT017	1.72347	-3.21621	6.71287	0.000337329	0.00610985	0.446795	TRUE	s
165	ST0165	ORF-T	YBR108W	YBR108W	-0.323566	-4.6402	-1.90714	0.100203	0.183315	-5.63718	FALSE	ns
166	ST0166	other	YBR109W-A, YBR110W	YBR109W-A, ALG1	-0.456489	-2.51134	-1.97897	0.0903149	0.17028	-5.5354	FALSE	ns
167	ST0167	ORF-T	YBR111W-A	SUS1	-0.132602	-3.31355	-0.718496	0.496823	0.603759	-7.01239	FALSE	ns
168	ST0168	ORF-T	YBR114W	RAD16	0.0382163	-4.56798	0.224605	0.829006	0.87914	-7.26816	FALSE	ns
169	ST0169	SUTs	SUT018	SUT018	0.561136	-4.19426	2.98492	0.0215453	0.0633041	-4.066	FALSE	ns
170	ST0170	ORF-T	YBR118W	TEF2	0.758816	0.23704	2.16061	0.0694309	0.141826	-5.27414	FALSE	ns
171	ST0171	ORF-T	YBR119W	MUD1	-0.714229	-4.44554	-2.71719	0.0312924	0.0819238	-4.45768	FALSE	ns
172	ST0172	CUTs	CUT026	CUT026	0.626434	-5.17215	3.03728	0.020049	0.0607485	-3.98993	FALSE	ns
173	ST0173	other	YBR126W-A, YBR126W-B	YBR126W-A, YBR126W-B	-0.116629	-1.05476	-0.690526	0.513149	0.61896	-7.03338	FALSE	ns
174	ST0174	CUTs	CUT027	CUT027	2.05864	-4.24938	11.0736	1.53607575158549e-05	0.00127248	3.77181	TRUE	s
175	ST0175	ORF-T	YBR131W	CCZ1	0.258319	-4.76574	1.44582	0.193493	0.297668	-6.25684	FALSE	ns
176	ST0176	ORF-T	YBR135W	CKS1	-0.280207	-1.95091	-1.49203	0.181366	0.284	-6.19821	FALSE	ns
177	ST0177	ORF-T	YBR136W	MEC1	-0.681908	-4.19534	-3.82746	0.00709052	0.0324087	-2.87741	TRUE	s
178	ST0178	ORF-T	YBR137W	YBR137W	0.0351165	-3.33678	0.14698	0.887488	0.92171	-7.28458	FALSE	ns
179	ST0179	ORF-T	YBR139W	YBR139W	-0.570669	-2.14538	-3.0166	0.0206262	0.0617255	-4.01994	FALSE	ns
180	ST0180	other	YBR141W-A	YBR141W-A	1.03143	-4.19118	3.62933	0.00912272	0.0372699	-3.14917	TRUE	s
181	ST0181	ORF-T	YBR142W	MAK5	-0.568862	-2.64706	-3.24759	0.0150709	0.0505982	-3.68688	FALSE	ns
182	ST0182	SUTs	SUT019	SUT019	0.259546	-5.25156	1.20477	0.269262	0.382586	-6.54562	FALSE	ns
183	ST0183	ORF-T	YBR145W	ADH5	0.0903413	-3.75482	0.392416	0.706978	0.781092	-7.2098	FALSE	ns
184	ST0184	ORF-T	YBR146W	MRPS9	-0.649635	-2.47475	-3.75984	0.00772225	0.0339929	-2.96956	TRUE	s
185	ST0185	other	YBR147W, YBR148W	YBR147W, YSW1	0.0761827	-6.1842	0.368013	0.724255	0.794866	-7.2202	FALSE	ns
186	ST0186	ORF-T	YBR148W	YSW1	0.289064	-6.38173	1.69629	0.135731	0.229204	-5.92891	FALSE	ns
187	ST0187	ORF-T	YBR149W	ARA1	-0.0993668	-1.48425	-0.564415	0.590922	0.685685	-7.11884	FALSE	ns
188	ST0188	ORF-T	YBR151W	APD1	-0.582865	-1.40723	-2.89736	0.0243195	0.0686802	-4.19363	FALSE	ns
189	ST0189	ORF-T	YBR152W, YBR153W	SPP381, RIB7	-0.0780985	-4.46751	-0.38477	0.712372	0.784904	-7.21313	FALSE	ns
190	ST0190	ORF-T	YBR155W	CNS1	-0.58064	-3.45845	-3.09162	0.018613	0.0578295	-3.91123	FALSE	ns
191	ST0191	SUTs	SUT020	SUT020	0.624693	-5.46925	2.30285	0.0565331	0.122463	-5.06678	FALSE	ns
192	ST0192	ORF-T	YBR158W	AMN1	-1.48456	-1.2432	-6.55626	0.000387692	0.00660257	0.294703	TRUE	s
193	ST0193	ORF-T	YBR159W	IFA38	-0.48489	-1.00973	-2.39963	0.0491823	0.111147	-4.92485	FALSE	ns
194	ST0194	ORF-T	YBR160W	CDC28	-0.351926	-3.48143	-1.9593	0.0929222	0.173858	-5.56337	FALSE	ns
195	ST0195	ORF-T	YBR161W	CSH1	-0.86112	-3.94134	-4.03635	0.00547133	0.0277072	-2.59684	TRUE	s
196	ST0196	ORF-T	YBR162W-A	YSY6	0.0791048	-0.871401	0.448421	0.668041	0.75085	-7.18355	FALSE	ns
197	ST0197	ORF-T	YBR163W	DEM1	0.285655	-3.43084	1.58906	0.158145	0.256487	-6.0722	FALSE	ns
198	ST0198	ORF-T	YBR165W	UBS1	-0.64459	-3.41482	-3.73611	0.00795827	0.0345303	-3.00204	TRUE	s
199	ST0199	CUTs	CUT028	CUT028	0.712045	-5.66242	1.68509	0.137924	0.23185	-5.94407	FALSE	ns
200	ST0200	ORF-T	YBR168W	PEX32	-0.211353	-4.36703	-1.05554	0.327875	0.444834	-6.70743	FALSE	ns
201	ST0201	CUTs	CUT029	CUT029	-0.0861517	-6.31036	-0.480308	0.646347	0.733146	-7.16714	FALSE	ns
202	ST0202	ORF-T	YBR171W	SEC66	-0.344029	-2.15833	-1.41999	0.200587	0.306444	-6.28919	FALSE	ns
203	ST0203	ORF-T	YBR175W	SWD3	-0.402059	-3.02209	-1.97485	0.0908546	0.171007	-5.54126	FALSE	ns
204	ST0204	ORF-T	YBR176W	ECM31	-0.593745	-4.29291	-3.15798	0.0170074	0.0547247	-3.8155	FALSE	ns
205	ST0205	ORF-T	YBR183W	YPC1	-1.18663	-4.17835	-5.46575	0.00110176	0.0114273	-0.848503	TRUE	s
206	ST0206	ORF-T	YBR184W	YBR184W	-0.117225	-6.35667	-0.692879	0.511762	0.61758	-7.03164	FALSE	ns
207	ST0207	ORF-T	YBR187W	GDT1	-0.92834	-0.962848	-4.98476	0.00182969	0.0152958	-1.40351	TRUE	s
208	ST0208	ORF-T	YBR189W	RPS9B	-1.59553	0.244184	-1.88726	0.103123	0.186866	-5.66516	FALSE	ns
209	ST0209	other	YBR190W, YBR191W, YBR191W-A	YBR190W, RPL21A, YBR191W-A	1.44762	-3.7579	7.42874	0.000184121	0.00452885	1.10726	TRUE	s
210	ST0210	ORF-T	YBR192W	RIM2	-0.416455	-4.17829	-2.33243	0.0541742	0.118768	-5.02346	FALSE	ns
211	ST0211	ORF-T	YBR194W	SOY1	0.360478	-4.45341	1.68556	0.137831	0.2318	-5.94343	FALSE	ns
212	ST0212	CUTs	CUT030	CUT030	1.10338	-3.31494	5.9787	0.000662611	0.00864133	-0.291756	TRUE	s
213	ST0213	ORF-T	YBR199W	KTR4	-0.137403	-2.14834	-0.721259	0.495229	0.602628	-7.01028	FALSE	ns
214	ST0214	ORF-T	YBR200W	BEM1	-0.167874	-3.48151	-0.945729	0.377252	0.494748	-6.8167	FALSE	ns
215	ST0215	ORF-T	YBR201W	DER1	0.196232	-4.09991	0.894087	0.40236	0.518144	-6.86492	FALSE	ns
216	ST0216	CUTs	CUT031	CUT031	0.319998	-6.42841	1.43376	0.196776	0.301443	-6.27198	FALSE	ns
217	ST0217	ORF-T	YBR202W	CDC47	-0.931953	-3.50083	-5.04772	0.00170913	0.0147087	-1.32898	TRUE	s
218	ST0218	ORF-T	YBR203W	COS111	0.285292	-4.68945	1.57822	0.160595	0.259579	-6.08646	FALSE	ns
219	ST0219	ORF-T	YBR205W, YBR206W	KTR3, YBR206W	-1.35268	-2.24825	-7.48379	0.00017609	0.00442972	1.1558	TRUE	s
220	ST0220	ORF-T	YBR207W	FTH1	-0.630772	-2.20004	-3.284	0.0143532	0.0489343	-3.63486	TRUE	s
221	ST0221	ORF-T	YBR210W	ERV15	0.346697	-2.76718	1.38154	0.21158	0.319347	-6.33677	FALSE	ns
222	ST0222	ORF-T	YBR212W	NGR1	-1.64364	-2.26888	-8.54817	7.80905449876923e-05	0.00274335	2.03748	TRUE	s
223	ST0223	ORF-T	YBR213W	MET8	-0.0870893	-5.79311	-0.345856	0.740093	0.806407	-7.22908	FALSE	ns
224	ST0224	ORF-T	YBR214W	SDS24	-0.339567	-1.98934	-1.57889	0.160444	0.259495	-6.08559	FALSE	ns
225	ST0225	ORF-T	YBR215W	HPC2	-0.642372	-4.23061	-3.64226	0.00897225	0.0368622	-3.13127	TRUE	s
226	ST0226	CUTs	CUT032	CUT032	0.0246922	-5.85511	0.064101	0.950767	0.966855	-7.29458	FALSE	ns
227	ST0227	ORF-T	YBR217W	ATG12	0.114615	-4.51499	0.540734	0.606254	0.699346	-7.13316	FALSE	ns
228	ST0228	CUTs	CUT033	CUT033	-0.0680248	-6.59829	-0.351017	0.736392	0.803457	-7.22706	FALSE	ns
229	ST0229	ORF-T	YBR224W, YBR225W	YBR224W, YBR225W	-0.283478	-3.84715	-1.62097	0.151135	0.247646	-6.02998	FALSE	ns
230	ST0230	ORF-T	YBR228W	SLX1	0.115713	-5.49308	0.541275	0.605901	0.699346	-7.13284	FALSE	ns
231	ST0231	ORF-T	YBR230W-A	YBR230W-A	-1.50653	-5.02765	-7.2105	0.000220316	0.00492966	0.911745	TRUE	s
232	ST0232	CUTs	CUT034	CUT034	0.491303	-6.09737	2.6983	0.032137	0.0832365	-4.48544	FALSE	ns
233	ST0233	ORF-T	YBR233W	PBP2	-0.291001	-4.11353	-1.69334	0.136305	0.229766	-5.93291	FALSE	ns
234	ST0234	ORF-T	YBR233W-A	DAD3	0.204425	-3.66089	1.17864	0.278844	0.393169	-6.57499	FALSE	ns
235	ST0235	ORF-T	YBR235W	YBR235W	-0.793531	-3.29119	-3.94343	0.00613502	0.0297836	-2.72087	TRUE	s
236	ST0236	ORF-T	YBR237W	PRP5	0.0978212	-5.07897	0.549103	0.600811	0.694831	-7.12817	FALSE	ns
237	ST0237	SUTs	SUT021	SUT021	1.00576	-4.55946	5.63246	0.000930641	0.0104124	-0.663694	TRUE	s
238	ST0238	CUTs	CUT035	CUT035	1.11689	-4.83332	3.02723	0.0203275	0.061303	-4.00452	FALSE	ns
239	ST0239	ORF-T	YBR242W	YBR242W	-0.782982	-3.34011	-4.19024	0.00453924	0.0250831	-2.39417	TRUE	s
240	ST0240	CUTs	CUT036	CUT036	0.368094	-6.42332	1.09747	0.31044	0.426188	-6.66345	FALSE	ns
241	ST0241	ORF-T	YBR244W	GPX2	-0.399466	-1.73249	-1.4354	0.196325	0.300899	-6.26992	FALSE	ns
242	ST0242	ORF-T	YBR246W	YBR246W	-0.166765	-2.38904	-0.860075	0.419562	0.533122	-6.89552	FALSE	ns
243	ST0243	CUTs	CUT037	CUT037	-2.37174	-4.97124	-10.8566	1.74226770328298e-05	0.00140462	3.63929	TRUE	s
244	ST0244	ORF-T	YBR250W	SPO23	1.35297	-5.52896	7.31631	0.000201847	0.0046655	1.00716	TRUE	s
245	ST0245	ORF-T	YBR251W	MRPS5	-0.557305	-4.09239	-3.21754	0.0156924	0.0519205	-3.72992	FALSE	ns
246	ST0246	ORF-T	YBR252W	DUT1	-0.239629	-1.79434	-1.19868	0.271469	0.384702	-6.5525	FALSE	ns
247	ST0247	ORF-T	YBR253W	SRB6	-0.218184	-2.91896	-1.22667	0.261448	0.374409	-6.52069	FALSE	ns
248	ST0248	ORF-T	YBR255W	YBR255W	-0.1263	-4.53767	-0.437875	0.675294	0.756313	-7.18875	FALSE	ns
249	ST0249	ORF-T	YBR257W	POP4	-0.106674	-4.0234	-0.456753	0.662338	0.746665	-7.17936	FALSE	ns
250	ST0250	ORF-T	YBR259W	YBR259W	-0.15483	-4.44576	-0.90495	0.396977	0.513943	-6.85495	FALSE	ns
251	ST0251	CUTs	CUT038	CUT038	1.8008	-5.25131	6.6046	0.000371294	0.00644403	0.341949	TRUE	s
252	ST0252	ORF-T	YBR263W	SHM1	-1.24113	-1.00882	-7.22728	0.000217264	0.00487637	0.926953	TRUE	s
253	ST0253	ORF-T	YBR265W	TSC10	-1.03694	-2.51663	-5.7019	0.000868341	0.00999302	-0.587823	TRUE	s
254	ST0254	ORF-T	YBR267W	REI1	-0.409949	-3.01662	-1.90025	0.101205	0.184742	-5.64688	FALSE	ns
255	ST0255	ORF-T	YBR268W	MRPL37	-0.218055	-2.57938	-0.982863	0.359947	0.477304	-6.78074	FALSE	ns
256	ST0256	SUTs	SUT022	SUT022	0.355472	-6.35619	1.59097	0.157718	0.25601	-6.06969	FALSE	ns
257	ST0257	ORF-T	YBR271W	YBR271W	-0.242208	-3.70964	-1.34841	0.221483	0.329911	-6.37719	FALSE	ns
258	ST0258	ORF-T	YBR274W	CHK1	-0.256473	-3.33836	-1.31925	0.230533	0.340324	-6.41229	FALSE	ns
259	ST0259	ORF-T	YBR278W	DPB3	-0.409403	-4.20848	-2.1089	0.074827	0.149407	-5.349	FALSE	ns
260	ST0260	ORF-T	YBR279W	PAF1	-0.444024	-3.53766	-2.35051	0.0527819	0.116843	-4.99696	FALSE	ns
261	ST0261	ORF-T	YBR282W	MRPL27	-0.108385	-3.85772	-0.44008	0.673775	0.755076	-7.18767	FALSE	ns
262	ST0262	ORF-T	YBR284W	YBR284W	0.251705	-5.38063	1.46984	0.1871	0.290538	-6.22647	FALSE	ns
263	ST0263	ORF-T	YBR285W	YBR285W	0.187065	-6.24372	0.985011	0.358965	0.476437	-6.77863	FALSE	ns
264	ST0264	ORF-T	YBR286W	APE3	-0.353766	0.692749	-1.95817	0.0930752	0.17404	-5.56498	FALSE	ns
265	ST0265	ORF-T	YBR287W	ZSP1	-0.887483	-1.23941	-4.15094	0.00475937	0.0256391	-2.4456	TRUE	s
266	ST0266	ORF-T	YBR289W	SNF5	-0.117688	-4.35234	-0.54548	0.603164	0.696555	-7.13034	FALSE	ns
267	ST0267	ORF-T	YBR290W	BSD2	-0.207701	-3.24338	-1.12419	0.29973	0.415594	-6.6348	FALSE	ns
268	ST0268	CUTs	CUT039	CUT039	0.749452	-6.21789	2.42953	0.0471157	0.107987	-4.88091	FALSE	ns
269	ST0269	SUTs	SUT023	SUT023	0.650547	-4.98098	2.5254	0.0410762	0.0984108	-4.73987	FALSE	ns
270	ST0270	ORF-T	YBR293W	VBA2	-0.335265	-2.93253	-1.83304	0.111516	0.197984	-5.741	FALSE	ns
271	ST0271	ORF-T	YBR295W	PCA1	-0.175756	-4.09809	-0.898368	0.400232	0.51641	-6.861	FALSE	ns
272	ST0272	SUTs	SUT024	SUT024	0.948914	-6.16714	4.57997	0.00287377	0.0190502	-1.89655	TRUE	s
273	ST0273	ORF-T	YBR297W	MAL33	0.949232	-3.66667	3.71519	0.00817295	0.0350641	-3.03075	TRUE	s
274	ST0274	ORF-T	YCL063W	VAC17	-0.515104	-3.10602	-2.95771	0.0223693	0.0647827	-4.10559	FALSE	ns
275	ST0275	ORF-T	YCL058W-A	YCL058W-A	0.419257	-3.81327	2.00173	0.0873885	0.16631	-5.50295	FALSE	ns
276	ST0276	ORF-T	YCL057W	PRD1	-0.39483	-2.01256	-1.98248	0.0898566	0.169679	-5.5304	FALSE	ns
277	ST0277	ORF-T	YCL055W	KAR4	-0.0678171	-3.8408	-0.360727	0.729447	0.798276	-7.22317	FALSE	ns
278	ST0278	ORF-T	YCL054W	SPB1	-0.156722	-2.86642	-0.67809	0.520518	0.624622	-7.04248	FALSE	ns
279	ST0279	ORF-T	YCL051W	LRE1	-0.35464	-3.64738	-2.05206	0.0812457	0.158184	-5.43086	FALSE	ns
280	ST0280	CUTs	CUT040	CUT040	1.66241	-4.38949	8.72931	6.85858720385737e-05	0.00257091	2.1775	TRUE	s
281	ST0281	SUTs	SUT025	SUT025	-0.379978	-5.73356	-2.19223	0.066327	0.137087	-5.22822	FALSE	ns
282	ST0282	ORF-T	YCL048W-A	YCL048W-A	1.18459	-5.93676	5.87492	0.000732524	0.00914015	-0.401581	TRUE	s
283	ST0283	SUTs	SUT026	SUT026	-0.564847	-5.52693	-1.41158	0.202946	0.30888	-6.29966	FALSE	ns
284	ST0284	ORF-T	YCL042W, YCL040W	YCL042W, GLK1	-0.540338	-0.772949	-3.11561	0.0180145	0.0566617	-3.87658	FALSE	ns
285	ST0285	ORF-T	YCL039W	GID7	0.0200757	-3.83702	0.107856	0.91728	0.941624	-7.29028	FALSE	ns
286	ST0286	ORF-T	YCL036W	GFD2	-0.3214	-4.5161	-1.46511	0.188342	0.291968	-6.23247	FALSE	ns
287	ST0287	ORF-T	YCL034W	LSB5	-0.776352	-3.72487	-3.71573	0.00816735	0.0350608	-3.03001	TRUE	s
288	ST0288	ORF-T	YCL032W	STE50	0.232727	-4.4364	1.35786	0.218618	0.327117	-6.36572	FALSE	ns
289	ST0289	CUTs	CUT041	CUT041	0.818476	-5.5979	3.11224	0.0180974	0.0568239	-3.88144	FALSE	ns
290	ST0290	ORF-T	YCL028W	RNQ1	-0.833841	-1.99226	-4.6188	0.00274917	0.0185111	-1.8482	TRUE	s
291	ST0291	ORF-T	YCL024W	KCC4	-0.32932	-5.2371	-1.57445	0.161456	0.260533	-6.09141	FALSE	ns
292	ST0292	ORF-T	YCL018W	LEU2	0.0697552	-6.54254	0.413141	0.692451	0.769601	-7.20047	FALSE	ns
293	ST0293	ORF-T	YCL014W	BUD3	-0.463156	-3.30536	-2.16317	0.0691746	0.141382	-5.27043	FALSE	ns
294	ST0294	CUTs	CUT042	CUT042	0.240487	-6.23679	0.88588	0.406462	0.52158	-6.87239	FALSE	ns
295	ST0295	SUTs	SUT027	SUT027	-0.580344	-4.59208	-1.78025	0.120325	0.209568	-5.81416	FALSE	ns
296	ST0296	ORF-T	YCL005W-A	VMA9	-1.32327	-1.77635	-7.75113	0.000142329	0.00393543	1.38726	TRUE	s
297	ST0297	ORF-T	YCL005W	LDB16	-0.31619	-2.32898	-1.45956	0.189811	0.293619	-6.2395	FALSE	ns
298	ST0298	ORF-T	YCL004W	PGS1	-0.436114	-4.79813	-2.16522	0.0689695	0.141082	-5.26745	FALSE	ns
299	ST0299	ORF-T	YCL001W	RER1	-1.0029	-1.37611	-3.86165	0.00679289	0.0318902	-2.83107	TRUE	s
300	ST0300	SUTs	SUT028	SUT028	0.0447264	-5.59817	0.227341	0.826964	0.877525	-7.26746	FALSE	ns
301	ST0301	SUTs	SUT029	SUT029	0.0399285	-6.43604	0.23591	0.820576	0.871803	-7.26521	FALSE	ns
302	ST0302	ORF-T	YCR003W	MRPL32	-0.410804	-3.88407	-2.36761	0.0514992	0.114949	-4.97187	FALSE	ns
303	ST0303	CUTs	CUT043	CUT043	0.452095	-6.18654	2.49452	0.0429289	0.101843	-4.78533	FALSE	ns
304	ST0304	SUTs	SUT030	SUT030	0.151757	-6.53771	0.826403	0.437113	0.549375	-6.92488	FALSE	ns
305	ST0305	SUTs	SUT031	SUT031	0.22308	-5.189	0.450006	0.666955	0.750026	-7.18276	FALSE	ns
306	ST0306	ORF-T	YCR008W	SAT4	-0.869725	-2.14225	-3.70308	0.00830015	0.0353569	-3.04739	TRUE	s
307	ST0307	CUTs	CUT044	CUT044	0.950693	-5.01853	3.01454	0.0206848	0.0617995	-4.02294	FALSE	ns
308	ST0308	ORF-T	YCR012W	PGK1	0.139026	1.70724	0.712525	0.500279	0.606798	-7.01693	FALSE	ns
309	ST0309	CUTs	CUT045	CUT045	0.0148875	-6.45155	0.073597	0.943488	0.960959	-7.29383	FALSE	ns
310	ST0310	ORF-T	YCR016W	YCR016W	-0.340644	-3.11816	-1.59434	0.156965	0.255243	-6.06524	FALSE	ns
311	ST0311	ORF-T	YCR019W	MAK32	-0.52605	-4.48513	-2.50715	0.0421607	0.100588	-4.76673	FALSE	ns
312	ST0312	ORF-T	YCR020W-B	HTL1	0.281048	-3.62156	1.57354	0.161664	0.26067	-6.09261	FALSE	ns
313	ST0313	CUTs	CUT046	CUT046	0.310221	-3.76574	1.12129	0.300876	0.416995	-6.63793	FALSE	ns
314	ST0314	SUTs	SUT032	SUT032	0.0844069	-5.94015	0.488865	0.640587	0.72855	-7.16255	FALSE	ns
315	ST0315	CUTs	CUT047	CUT047	0.593276	-5.74313	2.74593	0.0300515	0.0798154	-4.41546	FALSE	ns
316	ST0316	SUTs	SUT033	SUT033	-0.132642	-6.45195	-0.769839	0.467758	0.578492	-6.97203	FALSE	ns
317	ST0317	other	snR65	SNR65	2.70057	-2.39896	6.98249	0.000267008	0.00539357	0.702091	TRUE	s
318	ST0318	CUTs	CUT048	CUT048	2.2866	-5.15993	9.79837	3.33304435404505e-05	0.0018088	2.95146	TRUE	s
319	ST0319	ORF-T	YCR032W	BPH1	-1.00236	-4.79862	-3.87593	0.00667264	0.0315087	-2.81176	TRUE	s
320	ST0320	ORF-T	YCR033W	SNT1	-0.361057	-3.47047	-2.12426	0.0731813	0.14694	-5.32679	FALSE	ns
321	ST0321	ORF-T	YCR034W	FEN1	-0.637835	-0.166396	-3.00776	0.0208784	0.062148	-4.03278	FALSE	ns
322	ST0322	ORF-T	YCR036W	RBK1	-0.254514	-2.8741	-1.47368	0.186097	0.289413	-6.2216	FALSE	ns
323	ST0323	SUTs	SUT034	SUT034	-1.42093	-5.01841	-7.17331	0.000227256	0.00502313	0.877934	TRUE	s
324	ST0324	SUTs	SUT035	SUT035	0.358711	-6.18142	1.37304	0.214082	0.322053	-6.34719	FALSE	ns
325	ST0325	SUTs	SUT036	SUT036	0.354819	-5.37839	1.94483	0.0948883	0.176568	-5.5839	FALSE	ns
326	ST0326	other	YCR045W-A	YCR045W-A	-0.316105	-3.98858	-1.54329	0.168732	0.269083	-6.1321	FALSE	ns
327	ST0327	ORF-T	YCR048W	ARE1	-0.619576	-2.69976	-3.08264	0.0188426	0.0582198	-3.92423	FALSE	ns
328	ST0328	ORF-T	YCR051W	YCR051W	-0.697958	-3.34306	-3.25866	0.0148487	0.0501111	-3.67105	FALSE	ns
329	ST0329	ORF-T	YCR052W	RSC6	-0.539607	-3.29303	-2.8399	0.0263448	0.0726505	-4.27766	FALSE	ns
330	ST0330	ORF-T	YCR053W	THR4	-0.41253	-0.173947	-2.40896	0.0485273	0.110038	-4.91114	FALSE	ns
331	ST0331	SUTs	SUT037	SUT037	1.76477	-4.58191	10.0244	2.88705786388926e-05	0.00169191	3.10449	TRUE	s
332	ST0332	ORF-T	YCR060W	TAH1	0.741358	-3.48036	4.00345	0.00569679	0.0283165	-2.64061	TRUE	s
333	ST0333	ORF-T	YCR061W	YCR061W	-0.13303	-2.76902	-0.753191	0.477053	0.586894	-6.98537	FALSE	ns
334	ST0334	ORF-T	YCR063W	BUD31	-0.163668	-3.67385	-0.578729	0.581763	0.677652	-7.10992	FALSE	ns
335	ST0335	ORF-T	YCR065W	HCM1	-0.262528	-2.13199	-1.22473	0.262135	0.375044	-6.52292	FALSE	ns
336	ST0336	ORF-T	YCR066W	RAD18	-0.443117	-5.06585	-1.23316	0.25917	0.371732	-6.51325	FALSE	ns
337	ST0337	ORF-T	YCR068W	ATG15	-0.172258	-3.44886	-0.962913	0.369166	0.486777	-6.80019	FALSE	ns
338	ST0338	ORF-T	YCR069W	CPR4	0.118389	-1.33355	0.681125	0.518714	0.623279	-7.04027	FALSE	ns
339	ST0339	SUTs	SUT038	SUT038	0.142715	-3.32058	0.740647	0.484139	0.592603	-6.99527	FALSE	ns
340	ST0340	ORF-T	YCR073W-A	SOL2	-0.707482	-3.51703	-3.83299	0.00704141	0.0323913	-2.8699	TRUE	s
341	ST0341	ORF-T	YCR075W-A	YCR075W-A	0.65372	-3.3019	2.98848	0.0214398	0.0630961	-4.06081	FALSE	ns
342	ST0342	ORF-T	YCR079W	PTC6	-0.503616	-3.72278	-1.9597	0.0928683	0.173858	-5.5628	FALSE	ns
343	ST0343	ORF-T	YCR081W	SRB8	-0.636203	-4.19538	-3.29194	0.0142017	0.0485769	-3.62353	TRUE	s
344	ST0344	ORF-T	YCR082W	AHC2	-0.671946	-1.70037	-3.56475	0.00991627	0.0393191	-3.23887	TRUE	s
345	ST0345	ORF-T	YCR083W	TRX3	-0.276008	-3.33553	-1.21365	0.266071	0.379237	-6.53555	FALSE	ns
346	ST0346	ORF-T	YCR086W	CSM1	0.193727	-4.5132	1.14564	0.291352	0.40674	-6.61147	FALSE	ns
347	ST0347	ORF-T	YCR088W	ABP1	-0.599008	-2.26833	-3.02105	0.0205006	0.061451	-4.01348	FALSE	ns
348	ST0348	ORF-T	YCR089W	FIG2	0.293586	-1.8079	1.67446	0.140035	0.234748	-5.9584	FALSE	ns
349	ST0349	SUTs	SUT039	SUT039	-0.339476	-6.40087	-1.86995	0.105733	0.190033	-5.68945	FALSE	ns
350	ST0350	ORF-T	YCR091W	KIN82	0.152068	-5.6665	0.897555	0.400635	0.516747	-6.86175	FALSE	ns
351	ST0351	ORF-T	YCR093W	CDC39	-0.857951	-1.89946	-4.72978	0.00242497	0.0175278	-1.71126	TRUE	s
352	ST0352	ORF-T	YCR094W	CDC50	-0.029606	-3.21302	-0.159641	0.877886	0.915267	-7.28237	FALSE	ns
353	ST0353	ORF-T	YCR095W-A	YCR095W-A	0.212314	-5.03558	1.13609	0.295055	0.410649	-6.62189	FALSE	ns
354	ST0354	other	YCR097W	HMRA1	0.574477	-3.42767	3.10987	0.0181559	0.0569092	-3.88486	FALSE	ns
355	ST0355	SUTs	SUT040	SUT040	0.0110694	-6.01258	0.0579129	0.955513	0.970324	-7.29501	FALSE	ns
356	ST0356	ORF-T	YDL241W	YDL241W	0.299477	-4.02581	1.72195	0.130832	0.223075	-5.89406	FALSE	ns
357	ST0357	ORF-T	YDL240W	LRG1	-0.539183	-3.79867	-1.83682	0.110911	0.197054	-5.73575	FALSE	ns
358	ST0358	ORF-T	YDL237W	YDL237W	-0.714234	-2.36623	-3.92275	0.0062945	0.0303539	-2.74865	TRUE	s
359	ST0359	ORF-T	YDL236W	PHO13	-0.356593	-1.88642	-1.87414	0.105096	0.189079	-5.68358	FALSE	ns
360	ST0360	ORF-T	YDL233W	YDL233W	0.271529	-4.13379	1.57869	0.16049	0.259495	-6.08585	FALSE	ns
361	ST0361	ORF-T	YDL232W	OST4	-0.542108	-0.855248	-2.45526	0.0454096	0.105199	-4.84308	FALSE	ns
362	ST0362	ORF-T	YDL230W	PTP1	-0.298582	-4.13064	-1.71635	0.131887	0.224138	-5.90169	FALSE	ns
363	ST0363	ORF-T	YDL229W	SSB1	-0.339901	1.42074	-1.9805	0.0901152	0.170036	-5.53322	FALSE	ns
364	ST0364	ORF-T	YDL225W	SHS1	-0.239297	-3.23726	-1.4027	0.205464	0.311992	-6.31067	FALSE	ns
365	ST0365	CUTs	CUT049	CUT049	0.469138	-6.59682	1.50461	0.178187	0.280663	-6.18208	FALSE	ns
366	ST0366	SUTs	SUT041	SUT041	0.900757	-4.01131	4.8958	0.00201655	0.0161502	-1.50981	TRUE	s
367	ST0367	ORF-T	YDL219W	DTD1	-0.60396	-3.26645	-2.90564	0.0240416	0.0680819	-4.18154	FALSE	ns
368	ST0368	CUTs	CUT050	CUT050	0.0589858	-5.3964	0.245942	0.813117	0.866118	-7.26247	FALSE	ns
369	ST0369	ORF-T	YDL212W	SHR3	-0.320991	-0.8374	-1.53611	0.170451	0.271349	-6.14143	FALSE	ns
370	ST0370	SUTs	SUT042	SUT042	-0.0844397	-4.6071	-0.325137	0.755029	0.818761	-7.2369	FALSE	ns
371	ST0371	ORF-T	YDL210W	UGA4	0.560831	-5.89219	2.00449	0.0870391	0.166052	-5.499	FALSE	ns
372	ST0372	ORF-T	YDL208W	NHP2	-0.404425	-1.16712	-1.76552	0.122901	0.212691	-5.83445	FALSE	ns
373	ST0373	ORF-T	YDL207W	GLE1	-0.187928	-3.61768	-1.02055	0.343021	0.460146	-6.7432	FALSE	ns
374	ST0374	ORF-T	YDL206W	YDL206W	-0.751051	-4.16301	-3.64834	0.00890247	0.0367583	-3.12286	TRUE	s
375	ST0375	ORF-T	YDL204W	RTN2	0.449927	-4.23834	1.86333	0.106748	0.191483	-5.69871	FALSE	ns
376	ST0376	ORF-T	YDL204W	RTN2	0.724342	-3.8722	4.11632	0.00496306	0.0264019	-2.49109	TRUE	s
377	ST0377	ORF-T	YDL202W	MRPL11	-0.353122	-3.29484	-2.07688	0.078378	0.153961	-5.39518	FALSE	ns
378	ST0378	ORF-T	YDL201W	TRM8	-0.338913	-2.54867	-1.86596	0.106343	0.190861	-5.69503	FALSE	ns
379	ST0379	ORF-T	YDL195W	SEC31	-0.683233	-0.499623	-3.97265	0.00591722	0.028996	-2.68173	TRUE	s
380	ST0380	ORF-T	YDL194W	SNF3	-0.479217	-4.85145	-2.19877	0.0657019	0.136237	-5.21869	FALSE	ns
381	ST0381	ORF-T	YDL193W	NUS1	-0.711341	-3.34163	-3.83999	0.00697984	0.0322661	-2.86041	TRUE	s
382	ST0382	ORF-T	YDL192W	ARF1	-0.380168	-0.178683	-2.13819	0.0717211	0.145032	-5.30664	FALSE	ns
383	ST0383	ORF-T	YDL191W	RPL35A	1.04992	-4.18682	4.73124	0.002421	0.0175278	-1.70947	TRUE	s
384	ST0384	ORF-T	YDL189W	RBS1	-0.457525	-3.79884	-2.19837	0.06574	0.136239	-5.21927	FALSE	ns
385	ST0385	ORF-T	YDL185W	TFP1	-0.749026	0.384871	-4.23844	0.00428448	0.0244397	-2.33141	TRUE	s
386	ST0386	ORF-T	YDL182W	LYS20	-0.729166	-1.14384	-4.32093	0.00388433	0.0228535	-2.22479	TRUE	s
387	ST0387	ORF-T	YDL181W	INH1	-0.653953	-3.27618	-2.48659	0.0434182	0.102496	-4.79699	FALSE	ns
388	ST0388	ORF-T	YDL180W	YDL180W	-0.70119	-3.56567	-4.06777	0.00526504	0.0272314	-2.55517	TRUE	s
389	ST0389	ORF-T	YDL179W	PCL9	-0.521999	-3.6117	-2.3447	0.0532251	0.117475	-5.00547	FALSE	ns
390	ST0390	ORF-T	YDL178W	DLD2	-0.584531	-3.70663	-2.12064	0.0735661	0.147497	-5.33203	FALSE	ns
391	ST0391	ORF-T	YDL176W	YDL176W	-0.907154	-4.91905	-3.68829	0.00845837	0.0357084	-3.06774	TRUE	s
392	ST0392	ORF-T	YDL173W	YDL173W	-0.400697	-3.09968	-1.83781	0.110752	0.196917	-5.73436	FALSE	ns
393	ST0393	ORF-T	YDL170W	UGA3	-0.313039	-4.19885	-1.38111	0.211708	0.319348	-6.3373	FALSE	ns
394	ST0394	ORF-T	YDL168W	SFA1	-0.211504	-2.21161	-1.16261	0.284862	0.399984	-6.59279	FALSE	ns
395	ST0395	CUTs	CUT051	CUT051	1.25916	-4.61057	5.44827	0.00112167	0.0115699	-0.868109	TRUE	s
396	ST0396	ORF-T	YDL165W	CDC36	-0.47221	-2.38201	-2.75528	0.0296595	0.0791025	-4.40174	FALSE	ns
397	ST0397	ORF-T	YDL161W	ENT1	-0.429102	-3.2361	-2.18231	0.067285	0.138316	-5.24263	FALSE	ns
398	ST0398	ORF-T	YDL159W	STE7	-0.474998	-4.36915	-2.64528	0.0346387	0.0875236	-4.56343	FALSE	ns
399	ST0399	ORF-T	YDL156W	YDL156W	-0.0194258	-4.64274	-0.102636	0.921267	0.944516	-7.2909	FALSE	ns
400	ST0400	ORF-T	YDL155W	CLB3	-0.732896	-3.42686	-4.17496	0.00462345	0.0253226	-2.41414	TRUE	s
401	ST0401	ORF-T	YDL154W	MSH5	0.802881	-5.89831	3.98511	0.00582697	0.028689	-2.66509	TRUE	s
402	ST0402	ORF-T	YDL154W	MSH5	0.231427	-5.75967	0.879735	0.409554	0.524281	-6.87795	FALSE	ns
403	ST0403	ORF-T	YDL150W	RPC53	-0.590116	-3.50513	-3.23316	0.015366	0.0512105	-3.70753	FALSE	ns
404	ST0404	ORF-T	YDL149W	ATG9	-0.297307	-5.49414	-1.30756	0.234255	0.344002	-6.42625	FALSE	ns
405	ST0405	ORF-T	YDL147W	RPN5	0.072779	-1.80509	0.387111	0.710719	0.783813	-7.21212	FALSE	ns
406	ST0406	CUTs	CUT052	CUT052	0.87833	-5.79053	1.69359	0.136256	0.229736	-5.93257	FALSE	ns
407	ST0407	ORF-T	YDL146W	LDB17	-0.55481	-3.39947	-2.70113	0.0320089	0.0831032	-4.48128	FALSE	ns
408	ST0408	ORF-T	YDL143W	CCT4	-0.686712	-1.43937	-3.38166	0.0126043	0.0451965	-3.49606	TRUE	s
409	ST0409	ORF-T	YDL141W	BPL1	-0.739072	-2.6153	-4.16048	0.00470487	0.0255708	-2.43309	TRUE	s
410	ST0410	ORF-T	YDL138W	RGT2	-1.04083	-4.10991	-5.61649	0.000945663	0.010499	-0.681227	TRUE	s
411	ST0411	ORF-T	YDL137W	ARF2	-0.633633	-1.00262	-2.53518	0.0405072	0.0974898	-4.72548	FALSE	ns
412	ST0412	ORF-T	YDL136W	RPL35B	1.63085	-4.52572	6.56781	0.000383704	0.00656425	0.306009	TRUE	s
413	ST0413	ORF-T	YDL133W	YDL133W	-0.0873496	-3.82038	-0.436448	0.676278	0.756949	-7.18944	FALSE	ns
414	ST0414	ORF-T	YDL132W	CDC53	-0.578518	-3.09856	-2.59305	0.0373033	0.0921119	-4.64029	FALSE	ns
415	ST0415	ORF-T	YDL131W	LYS21	-0.473197	-1.89601	-2.18692	0.0668375	0.137683	-5.23592	FALSE	ns
416	ST0416	ORF-T	YDL130W-A	STF1	0.396368	-3.3576	2.27202	0.0591041	0.12632	-5.11187	FALSE	ns
417	ST0417	ORF-T	YDL130W	RPP1B	-0.346641	1.07603	-1.89144	0.102502	0.186099	-5.65928	FALSE	ns
418	ST0418	ORF-T	YDL129W	YDL129W	-0.508607	-4.24915	-2.2622	0.0599482	0.127357	-5.12622	FALSE	ns
419	ST0419	ORF-T	YDL128W	VCX1	-0.2746	-0.688264	-1.52821	0.172363	0.273674	-6.15167	FALSE	ns
420	ST0420	ORF-T	YDL127W	PCL2	0.00953363	-2.94615	0.0483692	0.962837	0.97531	-7.29559	FALSE	ns
421	ST0421	ORF-T	YDL124W	YDL124W	-0.345283	-0.511844	-2.0285	0.0840654	0.162155	-5.46466	FALSE	ns
422	ST0422	ORF-T	YDL123W	SNA4	0.151717	-1.8451	0.774817	0.465003	0.575672	-6.96799	FALSE	ns
423	ST0423	ORF-T	YDL122W	UBP1	-0.616436	-2.81052	-3.18248	0.0164526	0.0536518	-3.78025	FALSE	ns
424	ST0424	ORF-T	YDL120W	YFH1	-0.0211779	-2.15523	-0.121949	0.906529	0.934812	-7.28843	FALSE	ns
425	ST0425	ORF-T	YDL117W	CYK3	-1.03633	-3.72365	-5.13121	0.00156274	0.0140821	-1.23104	TRUE	s
426	ST0426	ORF-T	YDL116W	NUP84	-0.759512	-2.92932	-2.65154	0.0343329	0.0870532	-4.55421	FALSE	ns
427	ST0427	ORF-T	YDL112W	TRM3	-1.0278	-2.28839	-4.55548	0.00295557	0.0193722	-1.92716	TRUE	s
428	ST0428	ORF-T	YDL108W	KIN28	-0.334052	-3.56715	-1.63705	0.147714	0.24365	-6.00857	FALSE	ns
429	ST0429	ORF-T	YDL107W	MSS2	-0.0121511	-5.73034	-0.0651434	0.949968	0.966312	-7.2945	FALSE	ns
430	ST0430	ORF-T	YDL105W	NSE4	-0.137606	-4.85994	-0.787123	0.45824	0.56953	-6.95791	FALSE	ns
431	ST0431	ORF-T	YDL102W	POL3	-0.490339	-3.80152	-2.43245	0.046919	0.107637	-4.87662	FALSE	ns
432	ST0432	ORF-T	YDL099W	BUG1	0.308501	-3.43354	1.79836	0.117229	0.20568	-5.78914	FALSE	ns
433	ST0433	ORF-T	YDL095W	PMT1	-0.901448	-0.935727	-5.24402	0.00138671	0.0130963	-1.10028	TRUE	s
434	ST0434	ORF-T	YDL093W	PMT5	-0.718484	-3.16488	-3.0118	0.0207627	0.0619771	-4.02691	FALSE	ns
435	ST0435	ORF-T	YDL092W	SRP14	-0.33389	-2.14112	-1.4465	0.193308	0.297447	-6.25597	FALSE	ns
436	ST0436	ORF-T	YDL089W	YDL089W	-0.133691	-3.87594	-0.7132	0.499888	0.606596	-7.01642	FALSE	ns
437	ST0437	CUTs	CUT053	CUT053	0.2644	-6.5142	1.29087	0.239653	0.350477	-6.44602	FALSE	ns
438	ST0438	ORF-T	YDL086W	YDL086W	-1.16012	-1.91828	-6.18559	0.000544538	0.00784172	-0.0769324	TRUE	s
439	ST0439	ORF-T	YDL085W	NDE2	0.137244	-6.36608	0.79009	0.456619	0.56839	-6.95546	FALSE	ns
440	ST0440	ORF-T	YDL084W	SUB2	-0.726429	0.0945661	-4.21107	0.00442711	0.0248459	-2.367	TRUE	s
441	ST0441	ORF-T	YDL082W	RPL13A	3.31824	-3.19421	6.40655	0.000443916	0.00712618	0.146606	TRUE	s
442	ST0442	CUTs	CUT054	CUT054	0.29851	-4.93567	0.899868	0.399489	0.516	-6.85963	FALSE	ns
443	ST0443	SUTs	SUT043	SUT043	0.1104	-4.31386	0.644255	0.540906	0.642409	-7.0665	FALSE	ns
444	ST0444	SUTs	SUT044	SUT044	0.154931	-6.11768	0.651738	0.536355	0.638358	-7.06128	FALSE	ns
445	ST0445	SUTs	SUT045	SUT045	0.176923	-4.93663	0.640145	0.543416	0.644547	-7.06935	FALSE	ns
446	ST0446	ORF-T	YDL075W	RPL31A	2.86541	-4.45315	11.4173	1.26392636024608e-05	0.00114891	3.97626	TRUE	s
447	ST0447	SUTs	SUT046	SUT046	0.326715	-4.87972	1.34094	0.223769	0.332363	-6.38622	FALSE	ns
448	ST0448	ORF-T	YDL073W	YDL073W	-0.210095	-3.47841	-1.1043	0.307673	0.42383	-6.65617	FALSE	ns
449	ST0449	CUTs	CUT055	CUT055	0.0375135	-3.8809	0.143774	0.889923	0.923843	-7.28512	FALSE	ns
450	ST0450	SUTs	SUT047	SUT047	0.795419	-5.75645	3.32958	0.0135064	0.047032	-3.56995	TRUE	s
451	ST0451	ORF-T	YDL070W	BDF2	-0.77444	-2.25588	-3.47401	0.0111612	0.0420553	-3.36582	TRUE	s
452	ST0452	ORF-T	YDL066W	IDP1	-0.920722	-0.967501	-4.92023	0.0019632	0.0158451	-1.4805	TRUE	s
453	ST0453	ORF-T	YDL064W	UBC9	-1.00984	-2.1451	-5.5728	0.000988187	0.0107318	-0.729389	TRUE	s
454	ST0454	ORF-T	YDL060W	TSR1	-0.399515	-2.99324	-2.33128	0.0542637	0.118893	-5.02514	FALSE	ns
455	ST0455	ORF-T	YDL058W	USO1	-0.661826	-3.588	-3.83953	0.00698388	0.0322661	-2.86104	TRUE	s
456	ST0456	ORF-T	YDL057W	YDL057W	-0.561273	-5.46357	-2.23978	0.0619211	0.130419	-5.15895	FALSE	ns
457	ST0457	ORF-T	YDL056W	MBP1	-0.299149	-4.12207	-1.72814	0.129677	0.221416	-5.88563	FALSE	ns
458	ST0458	ORF-T	YDL051W	LHP1	-0.562413	-1.37893	-2.02739	0.0842004	0.162307	-5.46624	FALSE	ns
459	ST0459	ORF-T	YDL047W	SIT4	-0.383743	-2.34712	-2.1191	0.0737304	0.147638	-5.33426	FALSE	ns
460	ST0460	ORF-T	YDL046W	NPC2	-0.3742	-0.708095	-2.21712	0.0639823	0.133432	-5.19198	FALSE	ns
461	ST0461	ORF-T	YDL045W-A	MRP10	-0.0281482	-2.56809	-0.14221	0.89111	0.924666	-7.28537	FALSE	ns
462	ST0462	SUTs	SUT048	SUT048	0.133002	-6.5521	0.751239	0.478151	0.587847	-6.98692	FALSE	ns
463	ST0463	ORF-T	YDL031W	DBP10	-0.567129	-2.71727	-2.63885	0.0349558	0.0879579	-4.57289	FALSE	ns
464	ST0464	ORF-T	YDL030W	PRP9	-0.837735	-4.98035	-4.14679	0.00478329	0.0256899	-2.45105	TRUE	s
465	ST0465	ORF-T	YDL029W	ARP2	-0.495258	-1.60501	-2.76012	0.0294585	0.0787433	-4.39464	FALSE	ns
466	ST0466	SUTs	SUT049	SUT049	-0.296364	-5.51994	-1.24251	0.25592	0.368014	-6.5025	FALSE	ns
467	ST0467	ORF-T	YDL022W	GPD1	-1.85319	-1.37611	-10.5111	2.13924105357623e-05	0.00156973	3.42257	TRUE	s
468	ST0468	CUTs	CUT056	CUT056	0.201647	-6.52602	0.934623	0.382549	0.499981	-6.82724	FALSE	ns
469	ST0469	ORF-T	YDL021W	GPM2	-0.184584	-6.11824	-0.915049	0.392022	0.508705	-6.8456	FALSE	ns
470	ST0470	CUTs	CUT057	CUT057	1.20395	-5.22576	3.24362	0.0151515	0.0507427	-3.69256	FALSE	ns
471	ST0471	CUTs	CUT058	CUT058	-0.651186	-6.00309	-3.12852	0.017701	0.0561368	-3.85794	FALSE	ns
472	ST0472	CUTs	CUT059	CUT059	0.612371	-6.13933	2.2251	0.0632483	0.132285	-5.18035	FALSE	ns
473	ST0473	ORF-T	YDL017W	CDC7	-0.388589	-4.94252	-2.10246	0.0755278	0.150428	-5.35829	FALSE	ns
474	ST0474	ORF-T	YDL014W	NOP1	-0.467727	0.139979	-2.56501	0.0388209	0.0947016	-4.68156	FALSE	ns
475	ST0475	ORF-T	YDL013W	SLX5	-0.35491	-4.54428	-1.90986	0.0998098	0.182687	-5.63334	FALSE	ns
476	ST0476	ORF-T	YDL010W	GRX7	-0.271621	-3.38956	-1.24751	0.254195	0.366383	-6.49672	FALSE	ns
477	ST0477	ORF-T	YDL008W	APC11	-0.202883	-3.44876	-1.12454	0.299588	0.415594	-6.63442	FALSE	ns
478	ST0478	ORF-T	YDL007W	RPT2	-0.3567	-2.29981	-1.91461	0.0991272	0.181911	-5.62665	FALSE	ns
479	ST0479	ORF-T	YDL006W	PTC1	-0.514991	-3.82972	-2.68832	0.0325928	0.0840181	-4.50011	FALSE	ns
480	ST0480	CUTs	CUT060	CUT060	1.14625	-5.90088	5.24846	0.00138025	0.0130522	-1.09517	TRUE	s
481	ST0481	ORF-T	YDL004W	ATP16	-0.289765	-1.23473	-1.42433	0.199379	0.304853	-6.28378	FALSE	ns
482	ST0482	ORF-T	YDL003W	MCD1	-0.368364	-3.978	-1.28641	0.241117	0.351948	-6.4513	FALSE	ns
483	ST0483	ORF-T	YDL001W	RMD1	-0.450895	-4.54228	-1.91071	0.0996872	0.182629	-5.63214	FALSE	ns
484	ST0484	ORF-T	YDR002W	YRB1	-0.360494	-0.677634	-1.81276	0.114823	0.202366	-5.76919	FALSE	ns
485	ST0485	CUTs	CUT061	CUT061	1.27211	-5.39691	5.12236	0.00157758	0.0141376	-1.24138	TRUE	s
486	ST0486	other	YDR003W, YDR003W-A	RCR2, YDR003W-A	-0.263583	-3.21314	-1.47667	0.185317	0.288448	-6.2178	FALSE	ns
487	ST0487	ORF-T	YDR004W	RAD57	-0.069605	-4.27976	-0.387088	0.710735	0.783813	-7.21213	FALSE	ns
488	ST0488	SUTs	SUT050	SUT050	0.0076242	-4.39835	0.0299301	0.976998	0.985536	-7.29641	FALSE	ns
489	ST0489	ORF-T	YDR007W	TRP1	-0.436313	-3.03234	-2.37685	0.0508188	0.113639	-4.9583	FALSE	ns
490	ST0490	ORF-T	YDR009W	GAL3	-0.205405	-6.1848	-1.16928	0.282345	0.397293	-6.5854	FALSE	ns
491	ST0491	ORF-T	YDR011W	SNQ2	-0.626081	-0.212831	-3.63665	0.00903722	0.0370246	-3.13903	TRUE	s
492	ST0492	ORF-T	YDR012W	RPL4B	-0.222662	0.954223	-1.24008	0.256761	0.369078	-6.5053	FALSE	ns
493	ST0493	ORF-T	YDR013W	PSF1	-0.137668	-3.80187	-0.713165	0.499908	0.606596	-7.01645	FALSE	ns
494	ST0494	ORF-T	YDR014W	RAD61	0.133867	-5.23724	0.442706	0.671967	0.753864	-7.18638	FALSE	ns
495	ST0495	ORF-T	YDR014W-A	HED1	0.264703	-6.48531	1.5542	0.16615	0.266251	-6.1179	FALSE	ns
496	ST0496	CUTs	CUT062	CUT062	0.554433	-5.83438	2.3932	0.049639	0.111915	-4.9343	FALSE	ns
497	ST0497	SUTs	SUT051	SUT051	0.122206	-6.34762	0.587833	0.575981	0.673181	-7.10414	FALSE	ns
498	ST0498	CUTs	CUT063	CUT063	1.23805	-6.08286	4.72986	0.00242474	0.0175278	-1.71116	TRUE	s
499	ST0499	ORF-T	YDR021W	FAL1	-0.00495632	-4.1033	-0.0255312	0.980378	0.987314	-7.29655	FALSE	ns
500	ST0500	other	YDR023W, YDR024W	SES1, FYV1	-0.402287	-0.438247	-1.92653	0.0974327	0.179693	-5.6098	FALSE	ns
501	ST0501	other	YDR024W, YDR025W	FYV1, RPS11A	1.16971	-3.18867	6.39581	0.000448293	0.00716481	0.135873	TRUE	s
502	ST0502	SUTs	SUT052	SUT052	0.845764	-5.46885	1.97029	0.0914571	0.17181	-5.54776	FALSE	ns
503	ST0503	CUTs	CUT064	CUT064	1.12187	-4.71823	3.60612	0.00939964	0.0379534	-3.18134	TRUE	s
504	ST0504	ORF-T	YDR031W	MIC14	-0.230706	-4.01625	-0.979003	0.361717	0.479127	-6.78453	FALSE	ns
505	ST0505	SUTs	SUT053	SUT053	0.084324	-4.57045	0.372727	0.720903	0.792503	-7.21824	FALSE	ns
506	ST0506	ORF-T	YDR033W	MRH1	-1.52433	0.781187	-8.86431	6.23558782605777e-05	0.00242488	2.28009	TRUE	s
507	ST0507	ORF-T	YDR034W-B	YDR034W-B	1.12527	-3.84554	2.44583	0.0460279	0.106191	-4.85696	FALSE	ns
508	ST0508	ORF-T	YDR035W	ARO3	-0.626489	-2.19579	-2.95901	0.0223294	0.0647187	-4.10371	FALSE	ns
509	ST0509	ORF-T	YDR037W	KRS1	-0.6783	-0.0107778	-3.43588	0.011734	0.0433808	-3.41947	TRUE	s
510	ST0510	ORF-T	YDR041W	RSM10	0.240485	-3.04492	0.999558	0.352371	0.469655	-6.76424	FALSE	ns
511	ST0511	SUTs	SUT054	SUT054	0.777847	-5.96838	4.21009	0.00443234	0.0248459	-2.36828	TRUE	s
512	ST0512	CUTs	CUT065	CUT065	0.941874	-4.55796	3.33683	0.0133767	0.046812	-3.55964	TRUE	s
513	ST0513	SUTs	SUT055	SUT055	0.63767	-3.63528	3.51637	0.0105601	0.040739	-3.30643	TRUE	s
514	ST0514	ORF-T	YDR044W	HEM13	-0.563455	-1.24511	-3.0868	0.018736	0.0581016	-3.91821	FALSE	ns
515	ST0515	ORF-T	YDR047W	HEM12	-0.416149	-2.39626	-2.2388	0.0620086	0.130514	-5.16038	FALSE	ns
516	ST0516	ORF-T	YDR049W	YDR049W	0.0050194	-4.34437	0.0201774	0.984492	0.990759	-7.29669	FALSE	ns
517	ST0517	SUTs	SUT056	SUT056	0.286311	-5.74737	0.620287	0.555643	0.655203	-7.08286	FALSE	ns
518	ST0518	CUTs	CUT066	CUT066	0.686582	-4.60233	3.04555	0.019823	0.0603151	-3.97794	FALSE	ns
519	ST0519	ORF-T	YDR055W	PST1	-0.285405	-0.900273	-1.46884	0.187361	0.290881	-6.22774	FALSE	ns
520	ST0520	ORF-T	YDR057W	YOS9	-0.125509	-4.11091	-0.708468	0.502637	0.60879	-7.02	FALSE	ns
521	ST0521	ORF-T	YDR060W	MAK21	-0.488587	-2.10131	-2.73826	0.0303778	0.0803008	-4.42673	FALSE	ns
522	ST0522	ORF-T	YDR061W	YDR061W	-0.252992	-4.19373	-1.31243	0.232698	0.342339	-6.42044	FALSE	ns
523	ST0523	ORF-T	YDR062W	LCB2	-0.702555	-1.12314	-4.10549	0.00502874	0.0265377	-2.50536	TRUE	s
524	ST0524	ORF-T	YDR063W	YDR063W	-0.292894	-2.55902	-1.55823	0.165208	0.264915	-6.11265	FALSE	ns
525	ST0525	ORF-T	YDR064W	RPS13	-0.240599	1.55878	-1.3914	0.208712	0.316001	-6.32464	FALSE	ns
526	ST0526	ORF-T	YDR065W	YDR065W	-0.463005	-4.99056	-2.56105	0.0390409	0.0951107	-4.6874	FALSE	ns
527	ST0527	ORF-T	YDR068W	DOS2	0.0173944	-3.80947	0.0763371	0.941388	0.959329	-7.29359	FALSE	ns
528	ST0528	CUTs	CUT067	CUT067	1.01793	-5.87821	4.95828	0.00188321	0.0155445	-1.43504	TRUE	s
529	ST0529	ORF-T	YDR073W	SNF11	0.151937	-2.71906	0.441114	0.673063	0.754627	-7.18716	FALSE	ns
530	ST0530	ORF-T	YDR074W	TPS2	-1.15892	-2.74182	-5.47944	0.00108645	0.011367	-0.833184	TRUE	s
531	ST0531	ORF-T	YDR075W	PPH3	-0.503982	-3.61285	-2.87685	0.025023	0.0702512	-4.22361	FALSE	ns
532	ST0532	ORF-T	YDR076W	RAD55	-0.615953	-5.5524	-2.61562	0.0361262	0.0901234	-4.60707	FALSE	ns
533	ST0533	ORF-T	YDR077W	SED1	0.52922	1.59333	3.12687	0.0177407	0.0562136	-3.86032	FALSE	ns
534	ST0534	ORF-T	YDR079W	PET100	0.166149	-3.47791	0.848359	0.42561	0.538829	-6.90584	FALSE	ns
535	ST0535	ORF-T	YDR080W	VPS41	-0.348902	-4.18662	-1.94785	0.0944742	0.175985	-5.57962	FALSE	ns
536	ST0536	ORF-T	YDR082W	STN1	-0.0348099	-4.81555	-0.155064	0.881355	0.917437	-7.28319	FALSE	ns
537	ST0537	ORF-T	YDR083W	RRP8	-0.590987	-3.20011	-2.58008	0.0379977	0.0933511	-4.65939	FALSE	ns
538	ST0538	SUTs	SUT057	SUT057	0.384121	-5.65752	1.75157	0.125388	0.216093	-5.85359	FALSE	ns
539	ST0539	ORF-T	YDR089W	YDR089W	-0.760127	-3.89384	-4.39157	0.00357438	0.0217332	-2.13428	TRUE	s
540	ST0540	ORF-T	YDR092W	UBC13	-0.392496	-1.72259	-2.22749	0.0630301	0.132038	-5.17687	FALSE	ns
541	ST0541	ORF-T	YDR093W, YDR094W	DNF2, YDR094W	-0.893412	-2.82174	-4.47261	0.00325214	0.0205504	-2.03138	TRUE	s
542	ST0542	ORF-T	YDR096W	GIS1	-0.804384	-2.80843	-3.504	0.0107318	0.0409327	-3.32374	TRUE	s
543	ST0543	ORF-T	YDR099W	BMH2	-0.513802	-0.588738	-3.04522	0.019832	0.060317	-3.97841	FALSE	ns
544	ST0544	ORF-T	YDR100W	TVP15	-0.298892	-1.4368	-1.71263	0.132593	0.224968	-5.90675	FALSE	ns
545	ST0545	ORF-T	YDR103W	STE5	-0.224652	-3.12729	-1.25786	0.250656	0.362812	-6.48471	FALSE	ns
546	ST0546	ORF-T	YDR108W	GSG1	-0.191964	-3.97069	-0.878768	0.410042	0.524785	-6.87882	FALSE	ns
547	ST0547	ORF-T	YDR110W	FOB1	-0.0375508	-4.25706	-0.151419	0.884119	0.918998	-7.28383	FALSE	ns
548	ST0548	SUTs	SUT058	SUT058	1.50535	-5.46355	7.37569	0.000192256	0.0046224	1.06019	TRUE	s
549	ST0549	ORF-T	YDR115W	YDR115W	0.483117	-2.12545	1.7597	0.123932	0.21407	-5.84243	FALSE	ns
550	ST0550	ORF-T	YDR118W, YDR118W-A	APC4, YDR118W-A	0.179824	-4.66839	0.765077	0.470404	0.580678	-6.97587	FALSE	ns
551	ST0551	ORF-T	YDR119W	YDR119W	-1.00022	-1.52206	-5.8036	0.000785383	0.0094558	-0.477872	TRUE	s
552	ST0552	ORF-T	YDR119W-A	YDR119W-A	-0.334503	-5.72382	-0.859327	0.419946	0.533423	-6.89619	FALSE	ns
553	ST0553	ORF-T	YDR121W	DPB4	-0.670581	-3.36607	-3.55856	0.00999627	0.0395054	-3.2475	TRUE	s
554	ST0554	ORF-T	YDR122W	KIN1	-0.64846	-3.57588	-3.15815	0.0170034	0.0547247	-3.81525	FALSE	ns
555	ST0555	ORF-T	YDR124W	YDR124W	1.9375	-5.26208	11.457	1.23622628358757e-05	0.00113871	3.99943	TRUE	s
556	ST0556	ORF-T	YDR126W	SWF1	-0.261576	-3.76899	-1.55048	0.167028	0.267138	-6.12276	FALSE	ns
557	ST0557	ORF-T	YDR127W	ARO1	-0.87564	-1.65328	-4.75668	0.00235296	0.0172999	-1.67835	TRUE	s
558	ST0558	ORF-T	YDR128W	YDR128W	-0.286712	-3.56711	-1.60743	0.154074	0.251273	-6.04795	FALSE	ns
559	ST0559	CUTs	CUT068	CUT068	-0.0334813	-6.00046	-0.152804	0.883068	0.918826	-7.28359	FALSE	ns
560	ST0560	SUTs	SUT059	SUT059	1.04697	-5.76032	5.12491	0.00157328	0.0141299	-1.23839	TRUE	s
561	ST0561	SUTs	SUT060	SUT060	0.509206	-5.08193	2.0898	0.0769258	0.152117	-5.37657	FALSE	ns
562	ST0562	CUTs	CUT069	CUT069	-0.2144	-6.71065	-1.23615	0.258128	0.370823	-6.50982	FALSE	ns
563	ST0563	ORF-T	YDR137W	RGP1	-0.406302	-4.2135	-1.56697	0.163175	0.26241	-6.10121	FALSE	ns
564	ST0564	ORF-T	YDR138W	HPR1	-0.480934	-3.57898	-2.43242	0.046921	0.107637	-4.87666	FALSE	ns
565	ST0565	ORF-T	YDR140W	MTQ2	-0.418597	-2.97675	-2.25623	0.0604677	0.128161	-5.13495	FALSE	ns
566	ST0566	ORF-T	YDR145W	TAF12	-0.347872	-2.97449	-1.6601	0.142937	0.238184	-5.97771	FALSE	ns
567	ST0567	ORF-T	YDR147W	EKI1	0.0630785	-4.26046	0.325944	0.754446	0.818611	-7.23661	FALSE	ns
568	ST0568	ORF-T	YDR150W	NUM1	-0.547508	-2.68063	-2.77423	0.0288807	0.077527	-4.37393	FALSE	ns
569	ST0569	ORF-T	YDR152W	GIR2	-0.0299859	-2.16779	-0.158085	0.879065	0.916136	-7.28265	FALSE	ns
570	ST0570	ORF-T	YDR156W, YDR157W	RPA14, YDR157W	-0.494044	-0.560565	-2.71667	0.0313151	0.0819238	-4.45844	FALSE	ns
571	ST0571	ORF-T	YDR158W	HOM2	-0.422714	-0.25122	-2.45846	0.0452021	0.104952	-4.83837	FALSE	ns
572	ST0572	ORF-T	YDR159W	SAC3	-0.0865923	-3.73696	-0.467647	0.654918	0.740103	-7.17378	FALSE	ns
573	ST0573	ORF-T	YDR160W	SSY1	-0.0205981	-4.48643	-0.119269	0.908572	0.936233	-7.28879	FALSE	ns
574	ST0574	ORF-T	YDR161W	YDR161W	-0.39671	-2.75052	-1.78013	0.120346	0.209568	-5.81433	FALSE	ns
575	ST0575	ORF-T	YDR163W	CWC15	0.289481	-4.80803	1.62618	0.150018	0.24626	-6.02305	FALSE	ns
576	ST0576	ORF-T	YDR165W	TRM82	-1.00437	-2.17094	-5.0021	0.00179557	0.0152184	-1.38293	TRUE	s
577	ST0577	ORF-T	YDR167W	TAF10	-0.508716	-3.44748	-2.64175	0.0348121	0.0876874	-4.56861	FALSE	ns
578	ST0578	ORF-T	YDR168W	CDC37	-0.275666	-3.06238	-1.06975	0.32188	0.438582	-6.69266	FALSE	ns
579	ST0579	CUTs	CUT070	CUT070	0.814396	-5.82616	1.64379	0.146302	0.241963	-5.99956	FALSE	ns
580	ST0580	CUTs	CUT071	CUT071	1.17729	-4.39393	6.84811	0.000299735	0.00580734	0.575869	TRUE	s
581	ST0581	CUTs	CUT072	CUT072	1.77895	-5.49775	10.4267	2.25146667143341e-05	0.00156973	3.36845	TRUE	s
582	ST0582	ORF-T	YDR171W	HSP42	-0.912253	-3.0488	-3.29617	0.0141217	0.0484401	-3.61751	TRUE	s
583	ST0583	ORF-T	YDR172W	SUP35	-0.680849	-1.49475	-3.50628	0.0107	0.0409327	-3.32056	TRUE	s
584	ST0584	ORF-T	YDR174W	HMO1	-0.772126	-0.917634	-4.21524	0.00440507	0.0247747	-2.36157	TRUE	s
585	ST0585	ORF-T	YDR176W	NGG1	-0.3093	-4.22867	-1.46293	0.188918	0.29255	-6.23523	FALSE	ns
586	ST0586	ORF-T	YDR177W	UBC1	0.419671	-2.47262	2.471	0.0443976	0.10368	-4.81993	FALSE	ns
587	ST0587	ORF-T	YDR178W	SDH4	-0.360626	-1.42852	-1.88973	0.102756	0.186437	-5.66169	FALSE	ns
588	ST0588	ORF-T	YDR179W-A	YDR179W-A	-0.596828	-4.69367	-2.05665	0.0807082	0.157349	-5.42428	FALSE	ns
589	ST0589	ORF-T	YDR180W	SCC2	-0.429877	-3.76452	-2.075	0.0785921	0.15434	-5.39789	FALSE	ns
590	ST0590	other	YDR182W, YDR182W-A	CDC1, YDR182W-A	-0.367058	-2.78284	-1.65584	0.143808	0.239059	-5.98342	FALSE	ns
591	ST0591	ORF-T	YDR183W	PLP1	-0.506598	-4.3485	-2.85292	0.0258708	0.071779	-4.25861	FALSE	ns
592	ST0592	SUTs	SUT061	SUT061	-0.544267	-4.54801	-2.5299	0.040813	0.0979836	-4.73324	FALSE	ns
593	ST0593	ORF-T	YDR188W	CCT6	-0.806985	-1.58792	-4.39748	0.00354974	0.0216376	-2.12675	TRUE	s
594	ST0594	ORF-T	YDR189W	SLY1	-0.615627	-2.53683	-3.42447	0.0119116	0.0437923	-3.43556	TRUE	s
595	ST0595	ORF-T	YDR191W	HST4	-0.208684	-4.95087	-0.874016	0.412447	0.52675	-6.88309	FALSE	ns
596	ST0596	ORF-T	YDR195W	REF2	0.85072	-3.58769	4.75192	0.00236554	0.0173409	-1.68417	TRUE	s
597	ST0597	ORF-T	YDR197W	CBS2	-0.237198	-3.53818	-1.27864	0.24368	0.354823	-6.46043	FALSE	ns
598	ST0598	ORF-T	YDR201W	SPC19	0.120069	-4.057	0.562135	0.592389	0.687057	-7.12025	FALSE	ns
599	ST0599	ORF-T	YDR204W	COQ4	-0.4112	-3.74735	-2.2238	0.0633675	0.132492	-5.18225	FALSE	ns
600	ST0600	ORF-T	YDR205W	MSC2	-0.624354	-2.41261	-3.55454	0.0100485	0.0396272	-3.2531	TRUE	s
601	ST0601	ORF-T	YDR206W	EBS1	-0.220262	-3.20453	-1.1303	0.297321	0.413328	-6.62818	FALSE	ns
602	ST0602	ORF-T	YDR208W	MSS4	-0.492757	-2.46008	-2.00936	0.0864282	0.165255	-5.49205	FALSE	ns
603	ST0603	ORF-T	YDR210W	YDR210W	-0.569799	-1.65352	-3.37459	0.0127228	0.0454811	-3.50607	TRUE	s
604	ST0604	ORF-T	YDR211W	GCD6	-0.594595	-2.67972	-3.40363	0.0122436	0.0445176	-3.46498	TRUE	s
605	ST0605	ORF-T	YDR212W	TCP1	-1.00918	-1.20274	-5.9429	0.000685843	0.00884026	-0.329485	TRUE	s
606	ST0606	ORF-T	YDR213W	UPC2	-0.355629	-4.42703	-2.04944	0.0815546	0.158602	-5.43462	FALSE	ns
607	ST0607	ORF-T	YDR214W	AHA1	-0.535244	-1.52259	-2.97437	0.0218607	0.0639981	-4.08133	FALSE	ns
608	ST0608	ORF-T	YDR216W	ADR1	-0.171809	-3.41075	-0.972799	0.364576	0.482211	-6.79059	FALSE	ns
609	ST0609	ORF-T	YDR221W	GTB1	-0.699763	-3.66157	-3.23004	0.0154306	0.0513318	-3.712	FALSE	ns
610	ST0610	ORF-T	YDR222W	YDR222W	-0.555459	-3.26489	-2.13511	0.0720408	0.145253	-5.31109	FALSE	ns
611	ST0611	ORF-T	YDR223W	CRF1	0.0939932	-6.32531	0.530462	0.612972	0.705763	-7.1392	FALSE	ns
612	ST0612	CUTs	CUT073	CUT073	0.566288	-5.9212	1.57187	0.162047	0.261022	-6.09479	FALSE	ns
613	ST0613	ORF-T	YDR225W	HTA1	-1.20798	0.609161	-6.14474	0.000565834	0.00794642	-0.118919	TRUE	s
614	ST0614	ORF-T	YDR226W	ADK1	-0.592082	0.351066	-3.46334	0.0113183	0.0423218	-3.38081	TRUE	s
615	ST0615	ORF-T	YDR227W	SIR4	-0.346082	-4.33733	-1.55776	0.165316	0.265031	-6.11326	FALSE	ns
616	ST0616	ORF-T	YDR229W	IVY1	-0.553497	-4.45942	-2.78838	0.0283132	0.0765928	-4.35316	FALSE	ns
617	ST0617	ORF-T	YDR232W	HEM1	-0.711614	-0.564676	-4.17139	0.00464335	0.0253692	-2.4188	TRUE	s
618	ST0618	ORF-T	YDR234W	LYS4	-1.06819	-2.53438	-5.76358	0.000816911	0.00967521	-0.52097	TRUE	s
619	ST0619	ORF-T	YDR235W	PRP42	-0.614904	-4.16198	-2.95258	0.0225286	0.065075	-4.11307	FALSE	ns
620	ST0620	ORF-T	YDR237W	MRPL7	-0.407865	-3.44559	-2.13677	0.071868	0.145123	-5.30869	FALSE	ns
621	ST0621	ORF-T	YDR242W	AMD2	-0.753527	-6.01069	-3.89657	0.00650293	0.0310094	-2.78389	TRUE	s
622	ST0622	ORF-T	YDR244W	PEX5	0.0341988	-4.41449	0.157041	0.879856	0.916664	-7.28284	FALSE	ns
623	ST0623	ORF-T	YDR245W	MNN10	-0.479687	-2.31467	-2.42095	0.0476995	0.10886	-4.89353	FALSE	ns
624	ST0624	ORF-T	YDR246W	TRS23	-0.397958	-3.20415	-2.17441	0.0680589	0.139455	-5.25411	FALSE	ns
625	ST0625	ORF-T	YDR247W	VHS1	-0.945315	-2.41905	-5.41471	0.00116102	0.0118278	-0.905857	TRUE	s
626	ST0626	SUTs	SUT062	SUT062	-0.0381603	-6.43538	-0.223624	0.829739	0.879315	-7.26841	FALSE	ns
627	ST0627	ORF-T	YDR251W	PAM1	-0.598369	-2.37741	-3.12523	0.0177804	0.0562658	-3.86269	FALSE	ns
628	ST0628	CUTs	CUT074	CUT074	1.16018	-5.69704	2.8758	0.0250594	0.0702512	-4.22513	FALSE	ns
629	ST0629	ORF-T	YDR252W	BTT1	-0.342503	-4.12282	-1.36263	0.217182	0.325505	-6.3599	FALSE	ns
630	ST0630	ORF-T	YDR254W	CHL4	-1.1033	-5.24157	-5.08772	0.00163716	0.0144659	-1.28193	TRUE	s
631	ST0631	SUTs	SUT063	SUT063	-0.358171	-4.06007	-1.57675	0.16093	0.259948	-6.08839	FALSE	ns
632	ST0632	CUTs	CUT075	CUT075	-0.308471	-5.86508	-1.6858	0.137784	0.231776	-5.94311	FALSE	ns
633	ST0633	SUTs	SUT064	SUT064	1.88122	-4.0134	8.08489	0.00011003	0.00329276	1.66655	TRUE	s
634	ST0634	ORF-T	YDR262W	YDR262W	0.196411	-2.09173	0.80276	0.449745	0.561468	-6.94492	FALSE	ns
635	ST0635	ORF-T	YDR265W	PEX10	0.00277565	-4.636	0.0121787	0.990639	0.994073	-7.29684	FALSE	ns
636	ST0636	ORF-T	YDR268W	MSW1	-1.1198	-5.13554	-5.74891	0.000828824	0.00974294	-0.536822	TRUE	s
637	ST0637	ORF-T	YDR270W	CCC2	-0.710126	-4.00535	-2.73528	0.0305054	0.0805501	-4.43111	FALSE	ns
638	ST0638	ORF-T	YDR272W	GLO2	-0.608079	-3.51665	-3.39962	0.0123086	0.0445978	-3.47065	TRUE	s
639	ST0639	ORF-T	YDR273W	DON1	0.838349	-5.29197	3.14644	0.0172756	0.0553425	-3.83212	FALSE	ns
640	ST0640	ORF-T	YDR275W	BSC2	0.148112	-4.13165	0.71806	0.497075	0.603863	-7.01273	FALSE	ns
641	ST0641	SUTs	SUT065	SUT065	0.74811	-5.28846	4.39432	0.00356291	0.0216816	-2.13078	TRUE	s
642	ST0642	ORF-T	YDR279W	RNH202	-0.938288	-4.01872	-3.67608	0.0085915	0.0359546	-3.08457	TRUE	s
643	ST0643	ORF-T	YDR280W	RRP45	-0.481961	-3.06009	-2.4432	0.0462014	0.106513	-4.86082	FALSE	ns
644	ST0644	CUTs	CUT076	CUT076	0.846251	-4.89888	3.52443	0.0104497	0.0404919	-3.29515	TRUE	s
645	ST0645	ORF-T	YDR285W	ZIP1	0.0576709	-6.36771	0.285102	0.784208	0.843603	-7.25069	FALSE	ns
646	ST0646	ORF-T	YDR287W	YDR287W	-1.00511	-4.40232	-4.88116	0.0020493	0.0162924	-1.52741	TRUE	s
647	ST0647	ORF-T	YDR288W	NSE3	-0.267332	-3.85269	-1.45046	0.192243	0.296373	-6.251	FALSE	ns
648	ST0648	ORF-T	YDR291W	HRQ1	-0.587121	-4.35173	-3.47158	0.0111967	0.0420818	-3.36923	TRUE	s
649	ST0649	ORF-T	YDR296W	MHR1	-0.207414	-3.96193	-0.759538	0.473494	0.583602	-6.98031	FALSE	ns
650	ST0650	ORF-T	YDR297W	SUR2	-0.50408	-1.20485	-2.66754	0.0335646	0.0857931	-4.53068	FALSE	ns
651	ST0651	ORF-T	YDR299W	BFR2	0.0515859	-3.28793	0.240761	0.816967	0.869327	-7.2639	FALSE	ns
652	ST0652	CUTs	CUT077	CUT077	0.968309	-5.13477	2.04205	0.0824318	0.159852	-5.44523	FALSE	ns
653	ST0653	ORF-T	YDR301W	CFT1	-0.832732	-3.69903	-3.99202	0.00577752	0.0285616	-2.65585	TRUE	s
654	ST0654	ORF-T	YDR302W	GPI11	-0.713105	-2.51748	-3.13797	0.0174752	0.0557123	-3.84432	FALSE	ns
655	ST0655	CUTs	CUT078	CUT078	0.280213	-5.93135	1.3788	0.212383	0.320026	-6.34013	FALSE	ns
656	ST0656	ORF-T	YDR307W	YDR307W	-0.613227	-2.67947	-2.97153	0.0219466	0.0640625	-4.08547	FALSE	ns
657	ST0657	SUTs	SUT066	SUT066	1.07716	-3.91286	4.26463	0.00415269	0.0238345	-2.29745	TRUE	s
658	ST0658	ORF-T	YDR311W	TFB1	-0.0672339	-3.84762	-0.388593	0.709673	0.783376	-7.21147	FALSE	ns
659	ST0659	ORF-T	YDR312W	SSF2	-0.152049	-3.71699	-0.641695	0.542468	0.643738	-7.06828	FALSE	ns
660	ST0660	CUTs	CUT079	CUT079	-0.0136301	-6.48845	-0.075841	0.941768	0.959582	-7.29364	FALSE	ns
661	ST0661	CUTs	CUT080	CUT080	1.34299	-5.83597	6.23438	0.00052028	0.00769752	-0.027059	TRUE	s
662	ST0662	ORF-T	YDR316W	OMS1	0.00237737	-5.42571	0.0102089	0.992153	0.995301	-7.29687	FALSE	ns
663	ST0663	ORF-T	YDR317W	HIM1	-0.0591341	-6.18465	-0.313021	0.763817	0.825821	-7.24126	FALSE	ns
664	ST0664	ORF-T	YDR318W	MCM21	0.417417	-5.14173	1.47671	0.185307	0.288448	-6.21775	FALSE	ns
665	ST0665	CUTs	CUT081	CUT081	1.70502	-5.39825	6.71612	0.000336367	0.00610985	0.449918	TRUE	s
666	ST0666	ORF-T	YDR321W	ASP1	-0.536089	-0.384258	-2.9112	0.0238569	0.0677353	-4.17342	FALSE	ns
667	ST0667	ORF-T	YDR322W	MRPL35	-0.348652	-3.50531	-1.75393	0.124964	0.215647	-5.85035	FALSE	ns
668	ST0668	ORF-T	YDR325W	YCG1	-0.840949	-4.56392	-4.46121	0.00329546	0.0206414	-2.0458	TRUE	s
669	ST0669	ORF-T	YDR330W	UBX5	0.0220135	-4.00393	0.120027	0.907994	0.935922	-7.28869	FALSE	ns
670	ST0670	ORF-T	YDR331W	GPI8	-0.742057	-2.73028	-4.18165	0.00458636	0.0252284	-2.40539	TRUE	s
671	ST0671	ORF-T	YDR332W	IRC3	-0.203492	-5.28293	-1.10444	0.307618	0.42383	-6.65603	FALSE	ns
672	ST0672	ORF-T	YDR334W	SWR1	-0.749222	-4.17699	-4.19512	0.00451267	0.0250123	-2.38779	TRUE	s
673	ST0673	SUTs	SUT067	SUT067	0.882302	-6.46842	3.0472	0.0197782	0.0602543	-3.97554	FALSE	ns
674	ST0674	ORF-T	YDR335W	MSN5	-0.874876	-2.70255	-4.57655	0.00288504	0.0190975	-1.90082	TRUE	s
675	ST0675	ORF-T	YDR336W	YDR336W	-0.226984	-4.46227	-1.10067	0.30914	0.42515	-6.66004	FALSE	ns
676	ST0676	ORF-T	YDR337W	MRPS28	-0.0870186	-3.95332	-0.386924	0.71085	0.783822	-7.2122	FALSE	ns
677	ST0677	CUTs	CUT082	CUT082	0.254874	-6.64237	1.44408	0.193962	0.298201	-6.25902	FALSE	ns
678	ST0678	CUTs	CUT083	CUT083	0.168283	-5.61912	0.749691	0.479023	0.588421	-6.98815	FALSE	ns
679	ST0679	CUTs	CUT084	CUT084	0.860296	-4.96013	1.80929	0.1154	0.20298	-5.77401	FALSE	ns
680	ST0680	SUTs	SUT068	SUT068	0.0342452	-6.02082	0.112038	0.914087	0.939274	-7.28975	FALSE	ns
681	ST0681	SUTs	SUT069	SUT069	0.0876106	-6.47888	0.483581	0.644141	0.73122	-7.16539	FALSE	ns
682	ST0682	CUTs	CUT085	CUT085	-0.0151212	-5.30124	-0.0505955	0.961128	0.974041	-7.29546	FALSE	ns
683	ST0683	SUTs	SUT070	SUT070	-0.168735	-4.1669	-0.475931	0.649304	0.735244	-7.16945	FALSE	ns
684	ST0684	ORF-T	YDR347W	MRP1	-0.290218	-2.71187	-1.64031	0.14703	0.242903	-6.00422	FALSE	ns
685	ST0685	SUTs	SUT071	SUT071	0.45234	-4.46733	2.24175	0.0617448	0.130147	-5.15607	FALSE	ns
686	ST0686	ORF-T	YDR351W	SBE2	-0.358501	-3.38223	-1.82178	0.113341	0.200344	-5.75667	FALSE	ns
687	ST0687	ORF-T	YDR352W	YDR352W	-0.974181	-2.70556	-5.53857	0.00102301	0.0110539	-0.767304	TRUE	s
688	ST0688	ORF-T	YDR353W	TRR1	-0.786635	-0.197555	-3.66835	0.00867693	0.0361804	-3.09523	TRUE	s
689	ST0689	ORF-T	YDR354W	TRP4	-0.643973	-2.17161	-3.24286	0.015167	0.0507427	-3.69365	FALSE	ns
690	ST0690	ORF-T	YDR356W	SPC110	-0.0968881	-4.65703	-0.382173	0.714208	0.786332	-7.21424	FALSE	ns
691	ST0691	CUTs	CUT086	CUT086	-0.112518	-5.84785	-0.380894	0.715113	0.787089	-7.21479	FALSE	ns
692	ST0692	ORF-T	YDR358W	GGA1	-0.575546	-4.55146	-2.25559	0.0605228	0.128241	-5.13587	FALSE	ns
693	ST0693	SUTs	SUT072	SUT072	-0.488464	-6.33044	-2.69779	0.0321603	0.0832365	-4.4862	FALSE	ns
694	ST0694	ORF-T	YDR363W	ESC2	-0.235218	-4.55324	-1.06044	0.325798	0.442759	-6.70235	FALSE	ns
695	ST0695	ORF-T	YDR363W-A	SEM1	0.0129206	-2.10672	0.0631918	0.951464	0.967428	-7.29464	FALSE	ns
696	ST0696	ORF-T	YDR367W	YDR367W	-0.326111	-2.15161	-1.93116	0.0967835	0.178995	-5.60326	FALSE	ns
697	ST0697	ORF-T	YDR368W	YPR1	-1.02937	-2.06684	-5.41452	0.00116124	0.0118278	-0.906066	TRUE	s
698	ST0698	ORF-T	YDR371W	CTS2	-0.270728	-4.39757	-1.43536	0.196338	0.300899	-6.26998	FALSE	ns
699	ST0699	ORF-T	YDR373W	FRQ1	-0.435326	-2.29963	-2.09193	0.0766882	0.151914	-5.37349	FALSE	ns
700	ST0700	ORF-T	YDR374W-A	YDR374W-A	0.385005	-3.4563	1.57576	0.161156	0.260197	-6.08969	FALSE	ns
701	ST0701	ORF-T	YDR376W	ARH1	-0.736872	-4.01099	-4.20747	0.00444629	0.0248719	-2.37169	TRUE	s
702	ST0702	ORF-T	YDR377W	ATP17	-0.992685	-1.55249	-3.93651	0.0061879	0.0299851	-2.73016	TRUE	s
703	ST0703	ORF-T	YDR379W	RGA2	0.0411422	-4.16216	0.241959	0.816076	0.868761	-7.26357	FALSE	ns
704	ST0704	ORF-T	YDR380W	ARO10	-1.02303	-3.92825	-5.8606	0.000742805	0.00914015	-0.416842	TRUE	s
705	ST0705	ORF-T	YDR381W	YRA1	-0.574801	-1.84515	-3.39644	0.0123604	0.0447412	-3.47515	TRUE	s
706	ST0706	CUTs	CUT087	CUT087	0.64798	-6.22908	2.26757	0.059485	0.126757	-5.11837	FALSE	ns
707	ST0707	ORF-T	YDR382W	RPP2B	-0.0326207	1.09849	-0.186791	0.857374	0.900336	-7.27701	FALSE	ns
708	ST0708	CUTs	CUT088	CUT088	0.869857	-4.45566	4.44789	0.00334687	0.0208199	-2.06266	TRUE	s
709	ST0709	CUTs	CUT089	CUT089	1.05501	-3.9655	6.08867	0.000596613	0.0081526	-0.176897	TRUE	s
710	ST0710	ORF-T	YDR385W	EFT2	-0.110217	1.0468	-0.512827	0.624601	0.715516	-7.14932	FALSE	ns
711	ST0711	ORF-T	YDR386W	MUS81	0.240976	-5.90245	1.24864	0.253807	0.365917	-6.49542	FALSE	ns
712	ST0712	ORF-T	YDR388W	RVS167	-0.523412	-2.30573	-3.02613	0.0203582	0.0613275	-4.00611	FALSE	ns
713	ST0713	ORF-T	YDR389W	SAC7	-0.456463	-2.47279	-1.83693	0.110892	0.197054	-5.73559	FALSE	ns
714	ST0714	ORF-T	YDR392W	SPT3	-0.214662	-4.72593	-1.13958	0.293696	0.40917	-6.61808	FALSE	ns
715	ST0715	ORF-T	YDR393W	SHE9	-0.308691	-4.65864	-1.78273	0.119896	0.209135	-5.81074	FALSE	ns
716	ST0716	ORF-T	YDR394W	RPT3	-0.376182	-1.79184	-2.09231	0.0766462	0.151914	-5.37294	FALSE	ns
717	ST0717	ORF-T	YDR395W	SXM1	-0.795098	-1.67264	-3.70505	0.00827928	0.0353569	-3.04468	TRUE	s
718	ST0718	SUTs	SUT073	SUT073	1.7618	-4.88551	9.72417	3.49620726490391e-05	0.0018789	2.90047	TRUE	s
719	ST0719	ORF-T	YDR398W	UTP5	-0.644834	-2.42032	-3.28872	0.0142629	0.0487404	-3.62812	TRUE	s
720	ST0720	ORF-T	YDR399W	HPT1	-0.409234	-0.372992	-2.23605	0.0622558	0.130883	-5.16439	FALSE	ns
721	ST0721	CUTs	CUT090	CUT090	1.23235	-5.09064	3.3887	0.0124875	0.0449994	-3.48609	TRUE	s
722	ST0722	ORF-T	YDR400W	URH1	-1.42817	-3.34569	-7.36545	0.000193871	0.0046224	1.05107	TRUE	s
723	ST0723	ORF-T	YDR403W	DIT1	0.264478	-5.97072	1.0189	0.343749	0.460802	-6.74487	FALSE	ns
724	ST0724	ORF-T	YDR405W	MRP20	-0.15206	-4.34712	-0.859357	0.419931	0.533423	-6.89616	FALSE	ns
725	ST0725	ORF-T	YDR406W, YDR406W-A	PDR15, YDR406W-A	-0.909528	-3.07716	-5.23107	0.00140573	0.0132416	-1.11519	TRUE	s
726	ST0726	ORF-T	YDR409W	SIZ1	-0.251037	-4.24031	-0.919866	0.389674	0.506562	-6.84111	FALSE	ns
727	ST0727	ORF-T	YDR412W	RRP17	-0.360757	-3.45913	-1.71313	0.132496	0.22491	-5.90606	FALSE	ns
728	ST0728	SUTs	SUT074	SUT074	0.432408	-6.18265	1.73495	0.128417	0.219729	-5.87634	FALSE	ns
729	ST0729	ORF-T	YDR416W	SYF1	-0.373378	-4.58061	-1.92634	0.0974596	0.179697	-5.61007	FALSE	ns
730	ST0730	ORF-T	YDR418W	RPL12B	-0.142511	1.1159	-0.772882	0.466072	0.576604	-6.96956	FALSE	ns
731	ST0731	CUTs	CUT091	CUT091	-0.848391	-4.4683	-2.81879	0.0271332	0.0742152	-4.30858	FALSE	ns
732	ST0732	ORF-T	YDR419W	RAD30	-0.0400864	-4.71972	-0.171788	0.868696	0.908551	-7.28007	FALSE	ns
733	ST0733	ORF-T	YDR420W	HKR1	-0.578002	-2.28375	-3.22285	0.0155808	0.0516894	-3.72231	FALSE	ns
734	ST0734	ORF-T	YDR421W	ARO80	0.713647	-4.87979	2.42027	0.047746	0.108911	-4.89452	FALSE	ns
735	ST0735	CUTs	CUT092	CUT092	0.987127	-4.39658	3.9434	0.00613529	0.0297836	-2.72092	TRUE	s
736	ST0736	ORF-T	YDR425W	SNX41	-0.240406	-3.90688	-1.10414	0.307737	0.423837	-6.65634	FALSE	ns
737	ST0737	ORF-T	YDR427W	RPN9	-0.447551	-1.35669	-2.40728	0.0486447	0.110258	-4.91361	FALSE	ns
738	ST0738	CUTs	CUT093	CUT093	-0.291981	-5.57652	-1.34384	0.222878	0.331311	-6.38271	FALSE	ns
739	ST0739	ORF-T	YDR432W, YDR433W	NPL3, YDR433W	-6.17484	-3.25254	-33.3433	1.12515554473226e-08	7.35682130389187e-05	10.2099	TRUE	s
740	ST0740	ORF-T	YDR434W	GPI17	-0.426364	-2.70101	-2.1387	0.0716681	0.145032	-5.3059	FALSE	ns
741	ST0741	CUTs	CUT094	CUT094	0.627481	-4.58337	1.85194	0.108518	0.193796	-5.71465	FALSE	ns
742	ST0742	ORF-T	YDR436W	PPZ2	-0.619623	-3.8572	-3.23675	0.015292	0.0510576	-3.70239	FALSE	ns
743	ST0743	ORF-T	YDR437W, YDR438W, YDR439W	GPI19, THI74, LRS4	-0.355519	-3.76053	-1.88208	0.103897	0.187572	-5.67243	FALSE	ns
744	ST0744	ORF-T	YDR440W	DOT1	-0.459927	-4.46382	-2.15401	0.070097	0.142906	-5.28371	FALSE	ns
745	ST0745	ORF-T	YDR444W	YDR444W	0.268563	-4.5113	1.43425	0.196641	0.301301	-6.27136	FALSE	ns
746	ST0746	ORF-T	YDR448W	ADA2	-0.468049	-4.37385	-2.55361	0.0394567	0.0958347	-4.69835	FALSE	ns
747	ST0747	CUTs	CUT095	CUT095	1.61436	-5.69767	6.52809	0.000397627	0.00672452	0.267038	TRUE	s
748	ST0748	ORF-T	YDR450W	RPS18A	0.221494	-3.68609	1.04559	0.332127	0.449131	-6.71769	FALSE	ns
749	ST0749	CUTs	CUT096	CUT096	1.75123	-4.63274	6.52826	0.000397566	0.00672452	0.267207	TRUE	s
750	ST0750	ORF-T	YDR452W	PPN1	-0.126969	-2.52303	-0.543852	0.604223	0.697667	-7.13131	FALSE	ns
751	ST0751	CUTs	CUT097	CUT097	0.98937	-5.37952	2.22717	0.0630596	0.132038	-5.17734	FALSE	ns
752	ST0752	ORF-T	YDR456W	NHX1	-0.598869	-1.52218	-3.53651	0.0102867	0.0402176	-3.27827	TRUE	s
753	ST0753	ORF-T	YDR457W	TOM1	-0.75807	-2.14418	-3.78785	0.00745341	0.0332931	-2.93132	TRUE	s
754	ST0754	ORF-T	YDR460W	TFB3	-0.15798	-4.70572	-0.915962	0.391576	0.508249	-6.84475	FALSE	ns
755	ST0755	ORF-T	YDR461W	MFA1	0.414466	0.7625	2.27192	0.0591128	0.12632	-5.11202	FALSE	ns
756	ST0756	ORF-T	YDR462W	MRPL28	-0.444392	-3.49584	-2.04407	0.0821914	0.159556	-5.44233	FALSE	ns
757	ST0757	ORF-T	YDR463W	STP1	-0.625301	-3.12032	-2.8985	0.0242811	0.0686251	-4.19197	FALSE	ns
758	ST0758	ORF-T	YDR464W	SPP41	-0.0702414	-4.23482	-0.343881	0.741512	0.807711	-7.22984	FALSE	ns
759	ST0759	ORF-T	YDR466W	PKH3	-0.498524	-3.64745	-2.87836	0.0249703	0.0701634	-4.22139	FALSE	ns
760	ST0760	ORF-T	YDR469W	SDC1	0.136018	-3.84068	0.736231	0.48665	0.594177	-6.99872	FALSE	ns
761	ST0761	ORF-T	YDR471W	RPL27B	-0.588828	-0.0410078	-2.07966	0.0780627	0.153674	-5.39117	FALSE	ns
762	ST0762	other	snR13	SNR13	0.333025	0.123343	1.6591	0.143141	0.23836	-5.97905	FALSE	ns
763	ST0763	ORF-T	YDR472W	TRS31	-0.0890119	-2.02941	-0.431076	0.67999	0.759817	-7.19204	FALSE	ns
764	ST0764	SUTs	SUT075	SUT075	0.449696	-4.50185	2.58814	0.0375645	0.0925056	-4.64752	FALSE	ns
765	ST0765	SUTs	SUT076	SUT076	0.660485	-4.95937	3.13317	0.0175895	0.0558806	-3.85124	FALSE	ns
766	ST0766	ORF-T	YDR477W	SNF1	-0.507766	-2.9146	-2.8709	0.025231	0.070478	-4.23231	FALSE	ns
767	ST0767	ORF-T	YDR478W	SNM1	-0.175401	-4.78716	-0.608874	0.562746	0.661861	-7.09046	FALSE	ns
768	ST0768	ORF-T	YDR480W	DIG2	-0.346908	-4.62521	-1.83876	0.1106	0.196729	-5.73304	FALSE	ns
769	ST0769	ORF-T	YDR483W	KRE2	-0.562698	-0.507278	-2.78705	0.0283661	0.0766548	-4.35512	FALSE	ns
770	ST0770	ORF-T	YDR484W	VPS52	-0.536678	-4.18515	-3.09149	0.0186164	0.0578295	-3.91143	FALSE	ns
771	ST0771	CUTs	CUT098	CUT098	1.21385	-5.33842	4.70878	0.00248291	0.0177017	-1.73704	TRUE	s
772	ST0772	ORF-T	YDR489W	SLD5	-0.470408	-3.42692	-2.15135	0.0703678	0.143191	-5.28757	FALSE	ns
773	ST0773	ORF-T	YDR492W	IZH1	-0.733552	-0.843508	-3.573	0.0098109	0.0390716	-3.22739	TRUE	s
774	ST0774	ORF-T	YDR493W	FMP36	-0.448878	-3.69057	-2.46025	0.0450861	0.104754	-4.83574	FALSE	ns
775	ST0775	ORF-T	YDR494W	RSM28	-0.252205	-3.54402	-1.19899	0.271357	0.384702	-6.55215	FALSE	ns
776	ST0776	SUTs	SUT077	SUT077	-0.148617	-6.01001	-0.710842	0.501256	0.607523	-7.01821	FALSE	ns
777	ST0777	ORF-T	YDR499W	LCD1	0.146753	-5.27362	0.665331	0.528149	0.631486	-7.05167	FALSE	ns
778	ST0778	ORF-T	YDR501W	PLM2	-0.131271	-4.76986	-0.688857	0.514134	0.619414	-7.03461	FALSE	ns
779	ST0779	SUTs	SUT078	SUT078	0.483348	-5.96073	2.3173	0.0553677	0.120654	-5.04562	FALSE	ns
780	ST0780	SUTs	SUT079	SUT079	1.23166	-3.91584	6.79033	0.000315185	0.00602268	0.520975	TRUE	s
781	ST0781	CUTs	CUT099	CUT099	2.60791	-4.7242	5.91078	0.000707465	0.0090057	-0.36347	TRUE	s
782	ST0782	SUTs	SUT080	SUT080	0.963527	-6.04228	2.12625	0.0729706	0.14668	-5.32391	FALSE	ns
783	ST0783	ORF-T	YDR510W	SMT3	-0.29791	-0.531398	-1.72127	0.13096	0.22324	-5.89499	FALSE	ns
784	ST0784	ORF-T	YDR511W	ACN9	0.177776	-3.1615	1.04553	0.332154	0.449131	-6.71776	FALSE	ns
785	ST0785	ORF-T	YDR513W	GRX2	-0.467877	-1.1953	-2.71579	0.0313542	0.0819583	-4.45974	FALSE	ns
786	ST0786	ORF-T	YDR515W	SLF1	0.342869	-4.24873	1.90044	0.101177	0.184742	-5.64661	FALSE	ns
787	ST0787	ORF-T	YDR517W	GRH1	-1.20637	-2.17641	-6.31604	0.000482353	0.00743775	0.0557624	TRUE	s
788	ST0788	ORF-T	YDR518W	EUG1	-1.0049	-3.01618	-5.49576	0.00106851	0.0113011	-0.814958	TRUE	s
789	ST0789	ORF-T	YDR519W	FPR2	0.0188538	-1.91868	0.09851	0.92442	0.946814	-7.29138	FALSE	ns
790	ST0790	SUTs	SUT081	SUT081	-0.959318	-4.76615	-5.40864	0.00116829	0.0118278	-0.912695	TRUE	s
791	ST0791	CUTs	CUT100	CUT100	-0.578371	-5.93428	-2.97341	0.0218898	0.0640573	-4.08273	FALSE	ns
792	ST0792	SUTs	SUT082	SUT082	0.297412	-6.29931	1.49804	0.179842	0.282282	-6.19052	FALSE	ns
793	ST0793	ORF-T	YDR525W-A, YDR527W	SNA2, RBA50	-0.446592	-2.9566	-2.2731	0.0590127	0.126218	-5.1103	FALSE	ns
794	ST0794	ORF-T	YDR528W	HLR1	-0.474461	-4.11779	-1.56556	0.163501	0.262643	-6.10306	FALSE	ns
795	ST0795	CUTs	CUT101	CUT101	0.330251	-6.38326	1.04866	0.330813	0.448067	-6.71454	FALSE	ns
796	ST0796	ORF-T	YDR531W	YDR531W	-0.667193	-2.5746	-2.71667	0.0313155	0.0819238	-4.45845	FALSE	ns
797	ST0797	SUTs	SUT083	SUT083	0.912578	-3.9204	4.71631	0.00246197	0.0176388	-1.72779	TRUE	s
798	ST0798	ORF-T	YDR536W	STL1	0.142678	-6.5772	0.736613	0.486432	0.594111	-6.99842	FALSE	ns
799	ST0799	ORF-T	YDR538W	PAD1	-0.141337	-3.12852	-0.76869	0.468396	0.579183	-6.97296	FALSE	ns
800	ST0800	ORF-T	YDR539W	YDR539W	-1.61058	-4.32229	-5.83063	0.000764862	0.00931671	-0.448882	TRUE	s
801	ST0801	SUTs	SUT084	SUT084	0.104744	-6.33499	0.620733	0.555367	0.65509	-7.08257	FALSE	ns
802	ST0802	other	YDRWdelta31	YDRWdelta31	0.0049479	-5.96442	0.0183327	0.985909	0.991499	-7.29673	FALSE	ns
803	ST0803	SUTs	SUT085	SUT085	0.346777	-5.91628	1.9332	0.0964974	0.178739	-5.60037	FALSE	ns
804	ST0804	SUTs	SUT086	SUT086	0.468579	-6.23269	2.54574	0.0399014	0.0965305	-4.70993	FALSE	ns
805	ST0805	CUTs	CUT102	CUT102	0.750966	-6.36916	3.06321	0.0193495	0.0593211	-3.95234	FALSE	ns
806	ST0806	CUTs	CUT103	CUT103	1.42886	-5.68999	5.37053	0.0012152	0.0121721	-0.955789	TRUE	s
807	ST0807	SUTs	SUT087	SUT087	0.0367359	-5.36336	0.116931	0.910355	0.937293	-7.28911	FALSE	ns
808	ST0808	ORF-T	YEL072W	RMD6	0.0272603	-5.54405	0.113561	0.912926	0.938706	-7.28955	FALSE	ns
809	ST0809	ORF-T	YEL071W	DLD3	-0.634701	-1.46282	-3.56524	0.00990998	0.0393155	-3.23818	TRUE	s
810	ST0810	ORF-T	YEL066W	HPA3	0.0470356	-4.65632	0.224169	0.829331	0.87914	-7.26828	FALSE	ns
811	ST0811	ORF-T	YEL065W	SIT1	-0.245616	-1.18137	-1.28768	0.240697	0.351547	-6.44979	FALSE	ns
812	ST0812	CUTs	CUT104	CUT104	-0.0788636	-6.54908	-0.396891	0.70383	0.778441	-7.20783	FALSE	ns
813	ST0813	ORF-T	YEL062W	NPR2	-1.77555	-5.03823	-9.02401	5.58016557593447e-05	0.00231624	2.39957	TRUE	s
814	ST0814	ORF-T	YEL058W	PCM1	-0.360843	-2.11999	-2.09664	0.0761672	0.151253	-5.36669	FALSE	ns
815	ST0815	CUTs	CUT105	CUT105	1.74983	-4.89859	8.51182	8.01738259586605e-05	0.00275365	2.00905	TRUE	s
816	ST0816	ORF-T	YEL056W	HAT2	-0.782503	-3.30063	-4.05195	0.00536785	0.027509	-2.57614	TRUE	s
817	ST0817	ORF-T	YEL052W	AFG1	-0.933375	-2.43809	-5.50271	0.00106097	0.0112693	-0.807203	TRUE	s
818	ST0818	ORF-T	YEL051W	VMA8	-0.673323	-1.46915	-3.70047	0.0083278	0.035394	-3.05098	TRUE	s
819	ST0819	other	snR67	SNR67	0.66476	0.0613894	2.38411	0.0502916	0.112737	-4.94765	FALSE	ns
820	ST0820	ORF-T	YEL044W	IES6	0.942739	-5.35986	2.04373	0.0822325	0.159593	-5.44283	FALSE	ns
821	ST0821	ORF-T	YEL043W	YEL043W	-0.285513	-2.85673	-1.6302	0.149162	0.245251	-6.0177	FALSE	ns
822	ST0822	ORF-T	YEL042W	GDA1	-0.668324	-0.860879	-3.85563	0.00684429	0.0319664	-2.83922	TRUE	s
823	ST0823	ORF-T	YEL041W	YEF1	-0.116904	-6.18298	-0.689417	0.513803	0.619221	-7.0342	FALSE	ns
824	ST0824	ORF-T	YEL040W	UTR2	-0.708634	0.370523	-4.17372	0.00463035	0.0253363	-2.41576	TRUE	s
825	ST0825	ORF-T	YEL038W	UTR4	-0.31437	-1.72904	-1.73835	0.127791	0.219122	-5.87169	FALSE	ns
826	ST0826	other	YEL034W, YEL033W	HYP2, YEL033W	0.00492821	1.37245	0.0278167	0.978622	0.986302	-7.29648	FALSE	ns
827	ST0827	other	YEL033W	YEL033W	1.21178	-5.63566	3.08536	0.0187727	0.0581161	-3.92028	FALSE	ns
828	ST0828	ORF-T	YEL032W	MCM3	-1.18157	-3.05193	-6.16025	0.000557638	0.00794642	-0.102951	TRUE	s
829	ST0829	ORF-T	YEL031W	SPF1	-0.48717	-0.307232	-2.48411	0.0435727	0.102619	-4.80064	FALSE	ns
830	ST0830	ORF-T	YEL030W	ECM10	-0.614168	-5.72616	-3.504	0.0107318	0.0409327	-3.32374	TRUE	s
831	ST0831	other	YEL028W	YEL028W	-0.347629	-4.55017	-1.66033	0.14289	0.238162	-5.9774	FALSE	ns
832	ST0832	ORF-T	YEL027W	CUP5	-0.367521	0.681913	-2.1296	0.0726177	0.14612	-5.31907	FALSE	ns
833	ST0833	ORF-T	YEL026W	SNU13	-0.222202	0.845255	-1.04015	0.334471	0.450922	-6.72328	FALSE	ns
834	ST0834	ORF-T	YEL024W	RIP1	-0.463388	-2.49022	-2.26606	0.0596147	0.126908	-5.12058	FALSE	ns
835	ST0835	ORF-T	YEL022W	GEA2	-1.14663	-3.14235	-6.42825	0.000435225	0.00706463	0.168234	TRUE	s
836	ST0836	ORF-T	YEL021W	URA3	0.186549	-6.6154	1.02379	0.341599	0.458576	-6.73993	FALSE	ns
837	ST0837	ORF-T	YEL020W-A	TIM9	0.028005	-3.00676	0.132851	0.898227	0.928982	-7.28684	FALSE	ns
838	ST0838	SUTs	SUT088	SUT088	-0.118597	-6.60728	-0.604235	0.565648	0.664522	-7.09351	FALSE	ns
839	ST0839	ORF-T	YEL018W	EAF5	-0.213279	-4.58928	-0.780817	0.461697	0.57275	-6.96309	FALSE	ns
840	ST0840	ORF-T	YEL017W	GTT3	-0.904297	-2.28464	-5.33969	0.0012547	0.0124617	-0.990799	TRUE	s
841	ST0841	ORF-T	YEL015W	EDC3	-0.412123	-3.31497	-2.41533	0.0480862	0.109378	-4.90179	FALSE	ns
842	ST0842	ORF-T	YEL013W	VAC8	-1.17146	-1.80446	-5.8728	0.000734034	0.00914015	-0.403837	TRUE	s
843	ST0843	ORF-T	YEL012W	UBC8	-0.184539	-4.71116	-0.602736	0.566588	0.665196	-7.09449	FALSE	ns
844	ST0844	ORF-T	YEL011W	GLC3	-1.18663	-4.8091	-6.4239	0.000436954	0.0070769	0.163897	TRUE	s
845	ST0845	other	YELWdelta5	YELWdelta5	0.140757	-6.61364	0.814413	0.443487	0.555563	-6.9351	FALSE	ns
846	ST0846	ORF-T	YEL007W	YEL007W	-1.09092	-1.81797	-4.6735	0.00258372	0.0179319	-1.78048	TRUE	s
847	ST0847	ORF-T	YEL006W	YEA6	-0.0954319	-2.63445	-0.511558	0.625441	0.716192	-7.15003	FALSE	ns
848	ST0848	ORF-T	YEL004W	YEA4	-0.404341	-4.09994	-2.06475	0.0797666	0.156015	-5.41263	FALSE	ns
849	ST0849	ORF-T	YEL003W	GIM4	-0.44947	-3.14836	-1.75325	0.125086	0.215806	-5.85128	FALSE	ns
850	ST0850	CUTs	CUT106	CUT106	0.351152	-6.13192	1.84808	0.109123	0.194783	-5.72004	FALSE	ns
851	ST0851	ORF-T	YER001W	MNN1	-1.03717	-3.1014	-5.96856	0.000669097	0.0086887	-0.302421	TRUE	s
852	ST0852	ORF-T	YER002W	NOP16	-0.192202	-2.49497	-0.807068	0.447424	0.559338	-6.9413	FALSE	ns
853	ST0853	ORF-T	YER004W	FMP52	0.0668809	-1.03487	0.366354	0.725436	0.795489	-7.22088	FALSE	ns
854	ST0854	ORF-T	YER005W	YND1	-1.39534	-3.40012	-7.49009	0.000175197	0.00442372	1.16134	TRUE	s
855	ST0855	ORF-T	YER006W	NUG1	-0.53644	-1.81133	-2.69867	0.0321202	0.0832365	-4.4849	FALSE	ns
856	ST0856	ORF-T	YER007W	PAC2	-0.166052	-5.56853	-0.977517	0.3624	0.479857	-6.78598	FALSE	ns
857	ST0857	ORF-T	YER009W	NTF2	-0.293693	0.831487	-1.64915	0.145189	0.240504	-5.9924	FALSE	ns
858	ST0858	SUTs	SUT089	SUT089	0.55019	-4.3131	2.64409	0.0346973	0.0875498	-4.56518	FALSE	ns
859	ST0859	ORF-T	YER011W	TIR1	0.032119	-0.639058	0.0895326	0.931285	0.951835	-7.29234	FALSE	ns
860	ST0860	ORF-T	YER012W	PRE1	0.119801	-1.4864	0.646065	0.539803	0.641443	-7.06525	FALSE	ns
861	ST0861	ORF-T	YER013W	PRP22	-0.193126	-4.5739	-0.892059	0.403371	0.518865	-6.86677	FALSE	ns
862	ST0862	ORF-T	YER014W	HEM14	-0.497282	-4.67644	-2.79739	0.027958	0.0759721	-4.33995	FALSE	ns
863	ST0863	ORF-T	YER015W	FAA2	-0.599919	-5.43817	-2.8575	0.0257064	0.0715411	-4.25191	FALSE	ns
864	ST0864	ORF-T	YER016W	BIM1	-0.0807155	-3.66343	-0.276281	0.79069	0.848761	-7.25349	FALSE	ns
865	ST0865	SUTs	SUT090	SUT090	-0.0549532	-6.2579	-0.304864	0.769754	0.831253	-7.2441	FALSE	ns
866	ST0866	ORF-T	YER019W	ISC1	-0.493575	-2.73201	-2.70904	0.0316541	0.0824457	-4.46966	FALSE	ns
867	ST0867	ORF-T	YER020W	GPA2	-0.456353	-3.67902	-2.06602	0.0796199	0.155812	-5.4108	FALSE	ns
868	ST0868	ORF-T	YER021W	RPN3	-0.382679	-1.20401	-2.16467	0.0690243	0.141154	-5.26825	FALSE	ns
869	ST0869	ORF-T	YER022W	SRB4	-0.369493	-4.07081	-1.76999	0.122114	0.211583	-5.8283	FALSE	ns
870	ST0870	ORF-T	YER023W	PRO3	-0.84634	-1.12301	-4.69986	0.00250797	0.0177758	-1.748	TRUE	s
871	ST0871	ORF-T	YER024W	YAT2	-1.12775	-5.81829	-6.38472	0.00045286	0.00720612	0.124787	TRUE	s
872	ST0872	ORF-T	YER025W	GCD11	-0.720599	-0.692928	-4.04802	0.00539368	0.027509	-2.58135	TRUE	s
873	ST0873	CUTs	CUT107	CUT107	0.189942	-6.60852	0.837741	0.431145	0.544321	-6.9151	FALSE	ns
874	ST0874	CUTs	CUT108	CUT108	1.39013	-5.01771	4.12784	0.00489424	0.026189	-2.47594	TRUE	s
875	ST0875	ORF-T	YER030W	CHZ1	-0.148697	-2.92012	-0.805465	0.448287	0.560055	-6.94265	FALSE	ns
876	ST0876	ORF-T	YER032W	FIR1	-0.178149	-3.3714	-0.885029	0.406889	0.522036	-6.87316	FALSE	ns
877	ST0877	other	YER034W, YER035W	YER034W, EDC2	0.347263	-4.1154	1.53803	0.16999	0.270674	-6.13893	FALSE	ns
878	ST0878	ORF-T	YER037W	PHM8	-1.08522	-5.39027	-5.29116	0.00131981	0.012729	-1.04618	TRUE	s
879	ST0879	other	YER038W-A	FMP49	-0.159224	-5.86683	-0.555461	0.596693	0.690948	-7.12432	FALSE	ns
880	ST0880	ORF-T	YER040W	GLN3	-0.079296	-3.91184	-0.446983	0.669028	0.751498	-7.18427	FALSE	ns
881	ST0881	ORF-T	YER041W	YEN1	-0.0373241	-4.78764	-0.132558	0.89845	0.928982	-7.28688	FALSE	ns
882	ST0882	ORF-T	YER042W	MXR1	0.0115643	-2.06881	0.0581827	0.955306	0.970289	-7.29499	FALSE	ns
883	ST0883	CUTs	CUT109	CUT109	1.28141	-5.72367	5.30793	0.00129689	0.0126251	-1.027	TRUE	s
884	ST0884	ORF-T	YER046W	SPO73	0.165618	-4.06061	0.904426	0.397235	0.514186	-6.85544	FALSE	ns
885	ST0885	ORF-T	YER048W-A	ISD11	-0.447872	-2.00302	-2.54929	0.0397001	0.0962009	-4.7047	FALSE	ns
886	ST0886	ORF-T	YER049W	TPA1	-1.17275	-2.23433	-5.46924	0.00109783	0.0114212	-0.844595	TRUE	s
887	ST0887	ORF-T	YER051W	JHD1	-0.141858	-4.57292	-0.61781	0.55718	0.656484	-7.08452	FALSE	ns
888	ST0888	CUTs	CUT110	CUT110	-0.596316	-5.07644	-2.00757	0.0866523	0.165607	-5.49461	FALSE	ns
889	ST0889	SUTs	SUT091	SUT091	0.113436	-2.52191	0.595293	0.571267	0.668843	-7.09934	FALSE	ns
890	ST0890	SUTs	SUT092	SUT092	0.616135	-4.40687	3.2586	0.01485	0.0501111	-3.67114	FALSE	ns
891	ST0891	ORF-T	YER058W	PET117	-0.118632	-5.37765	-0.414464	0.691528	0.769046	-7.19986	FALSE	ns
892	ST0892	ORF-T	YER059W	PCL6	-1.18276	-4.13061	-5.40933	0.00116746	0.0118278	-0.911917	TRUE	s
893	ST0893	ORF-T	YER060W	FCY21	-0.953719	-3.38954	-5.10447	0.00160804	0.014298	-1.2623	TRUE	s
894	ST0894	ORF-T	YER063W	THO1	-3.44174	-4.35436	-16.3465	1.24097514221709e-06	0.000347091	6.32136	TRUE	s
895	ST0895	SUTs	SUT093	SUT093	0.482976	-3.63254	2.32991	0.0543708	0.119056	-5.02715	FALSE	ns
896	ST0896	ORF-T	YER066W	YER066W	-0.0579069	-5.07879	-0.3362	0.74704	0.812925	-7.23278	FALSE	ns
897	ST0897	ORF-T	YER067W	YER067W	-1.4716	-3.69053	-5.15847	0.00151801	0.0138681	-1.19928	TRUE	s
898	ST0898	ORF-T	YER068W	MOT2	-0.381682	-2.62203	-2.09935	0.0758684	0.150823	-5.36278	FALSE	ns
899	ST0899	ORF-T	YER069W	ARG5%2C6	-0.458051	-3.90037	-2.70455	0.0318548	0.0828202	-4.47625	FALSE	ns
900	ST0900	ORF-T	YER070W	RNR1	-1.00069	-0.198665	-5.83364	0.000762613	0.00931429	-0.445658	TRUE	s
901	ST0901	ORF-T	YER072W	VTC1	-0.510827	-0.61586	-2.10128	0.0756575	0.150528	-5.36	FALSE	ns
902	ST0902	ORF-T	YER073W	ALD5	-0.467754	-1.95792	-2.75129	0.029826	0.0793615	-4.40759	FALSE	ns
903	ST0903	ORF-T	YER074W	RPS24A	1.21694	-3.25819	6.23333	0.000520789	0.00769752	-0.0281303	TRUE	s
904	ST0904	ORF-T	YER074W-A	YOS1	0.0834521	-2.14067	0.483356	0.644293	0.731278	-7.16551	FALSE	ns
905	ST0905	SUTs	SUT094	SUT094	-0.00643659	-5.93595	-0.0255154	0.98039	0.987314	-7.29655	FALSE	ns
906	ST0906	CUTs	CUT111	CUT111	1.282	-5.37681	4.39083	0.0035775	0.021734	-2.13523	TRUE	s
907	ST0907	ORF-T	YER079W	YER079W	-0.231072	-3.73763	-1.06843	0.322436	0.439093	-6.69405	FALSE	ns
908	ST0908	ORF-T	YER080W	FMP29	-0.573982	-3.0948	-2.57495	0.0382759	0.0939077	-4.66694	FALSE	ns
909	ST0909	ORF-T	SRG1, YER081W	SRG1, SER3	0.201461	-2.38972	1.0074	0.348853	0.466249	-6.75642	FALSE	ns
910	ST0910	CUTs	CUT112	CUT112	0.196054	-6.41961	1.0392	0.334881	0.451223	-6.72425	FALSE	ns
911	ST0911	ORF-T	YER086W	ILV1	-0.526971	-0.122529	-2.98957	0.0214076	0.0630779	-4.05923	FALSE	ns
912	ST0912	ORF-T	YER087W	YER087W	-0.125342	-5.06852	-0.508813	0.627263	0.717888	-7.15157	FALSE	ns
913	ST0913	SUTs	SUT095	SUT095	0.00168652	-5.9557	0.0080277	0.99383	0.995747	-7.29689	FALSE	ns
914	ST0914	ORF-T	YER090W	TRP2	-0.69704	-1.65639	-3.74221	0.00789684	0.0344066	-2.99368	TRUE	s
915	ST0915	ORF-T	YER092W	IES5	0.313086	-2.94965	1.81077	0.115154	0.202809	-5.77196	FALSE	ns
916	ST0916	CUTs	CUT113	CUT113	1.50557	-4.47787	7.11986	0.00023767	0.00508335	0.829076	TRUE	s
917	ST0917	CUTs	CUT114	CUT114	0.91065	-5.60569	3.43127	0.0118055	0.0435342	-3.42597	TRUE	s
918	ST0918	ORF-T	YER095W	RAD51	-0.362998	-2.40473	-2.11435	0.0742386	0.148559	-5.34112	FALSE	ns
919	ST0919	ORF-T	YER096W	SHC1	0.728561	-5.82701	3.64265	0.00896771	0.0368622	-3.13072	TRUE	s
920	ST0920	ORF-T	YER097W, YER098W	YER097W, UBP9	-1.1101	-5.57947	-5.72643	0.000847463	0.0098604	-0.561175	TRUE	s
921	ST0921	ORF-T	YER100W	UBC6	-0.244493	-2.70969	-1.31582	0.231621	0.341375	-6.4164	FALSE	ns
922	ST0922	ORF-T	YER102W	RPS8B	1.1464	-3.73348	6.45384	0.000425221	0.00698016	0.193666	TRUE	s
923	ST0923	ORF-T	YER103W	SSA4	-0.0769022	-4.62207	-0.431339	0.679808	0.759731	-7.19191	FALSE	ns
924	ST0924	ORF-T	YER104W	RTT105	-1.09028	-5.61203	-5.72836	0.000845847	0.00985737	-0.559084	TRUE	s
925	ST0925	SUTs	SUT096	SUT096	0.451101	-5.69016	2.14544	0.0709724	0.144125	-5.29614	FALSE	ns
926	ST0926	ORF-T	YER112W	LSM4	-0.248824	-2.63394	-1.01299	0.346366	0.463521	-6.75082	FALSE	ns
927	ST0927	CUTs	CUT115	CUT115	0.37485	-6.3451	1.48328	0.183608	0.286032	-6.20938	FALSE	ns
928	ST0928	ORF-T	YER117W	RPL23B	1.35249	-4.47757	7.34024	0.000197917	0.00464953	1.02857	TRUE	s
929	ST0929	ORF-T	YER120W	SCS2	-0.417969	0.00739252	-2.31616	0.0554592	0.120712	-5.0473	FALSE	ns
930	ST0930	ORF-T	YER121W	YER121W	-0.0332153	-6.36344	-0.153811	0.882305	0.918294	-7.28341	FALSE	ns
931	ST0931	ORF-T	YER123W	YCK3	-0.0719796	-3.21634	-0.313229	0.763666	0.825781	-7.24119	FALSE	ns
932	ST0932	ORF-T	YER125W	RSP5	-0.749759	-1.16324	-4.15489	0.00473672	0.0256391	-2.44042	TRUE	s
933	ST0933	ORF-T	YER127W	LCP5	-0.18856	-3.20153	-0.914173	0.392449	0.508938	-6.84641	FALSE	ns
934	ST0934	ORF-T	YER128W	YER128W	-0.729916	-5.47513	-2.17865	0.0676427	0.138719	-5.24795	FALSE	ns
935	ST0935	ORF-T	YER129W	SAK1	-0.480615	-3.57617	-2.05222	0.0812274	0.158184	-5.43064	FALSE	ns
936	ST0936	CUTs	CUT116	CUT116	0.800329	-6.13478	1.93118	0.0967802	0.178995	-5.60323	FALSE	ns
937	ST0937	ORF-T	YER131W	RPS26B	0.97966	-3.79877	4.78096	0.00229	0.0170101	-1.64873	TRUE	s
938	ST0938	other	snR4	SNR4	0.154021	1.43859	0.719624	0.496172	0.603323	-7.01153	FALSE	ns
939	ST0939	CUTs	CUT117	CUT117	1.69884	-5.51503	6.00985	0.000643119	0.00855846	-0.259068	TRUE	s
940	ST0940	ORF-T	YER133W	GLC7	-0.580087	-1.37942	-3.02773	0.0203135	0.061303	-4.00379	FALSE	ns
941	ST0941	ORF-T	YER136W	GDI1	-0.178685	-1.57118	-1.05689	0.327302	0.444387	-6.70603	FALSE	ns
942	ST0942	other	SCR1	SCR1	0.477977	1.41151	2.48718	0.0433815	0.102492	-4.79612	FALSE	ns
943	ST0943	ORF-T	YER140W	YER140W	-0.140673	-3.81044	-0.824118	0.438322	0.55042	-6.92684	FALSE	ns
944	ST0944	ORF-T	YER141W	COX15	-1.12675	-1.9672	-6.62713	0.000363918	0.00640778	0.363882	TRUE	s
945	ST0945	ORF-T	YER143W	DDI1	-0.166537	-3.30332	-0.969827	0.365951	0.483711	-6.79348	FALSE	ns
946	ST0946	ORF-T	YER146W	LSM5	0.980497	-4.81642	3.65301	0.00884922	0.0366515	-3.1164	TRUE	s
947	ST0947	ORF-T	YER148W	SPT15	-0.506254	-1.81578	-2.93146	0.0231962	0.0664368	-4.14385	FALSE	ns
948	ST0948	ORF-T	YER150W	SPI1	-0.315992	-1.97363	-1.33027	0.227075	0.335764	-6.39907	FALSE	ns
949	ST0949	ORF-T	YER154W	OXA1	-0.806595	-3.43438	-4.66679	0.00260341	0.0180304	-1.78876	TRUE	s
950	ST0950	CUTs	CUT118	CUT118	2.76581	-4.33554	9.00844	5.64047542521637e-05	0.00231624	2.38801	TRUE	s
951	ST0951	ORF-T	YER157W	COG3	-0.439611	-3.62897	-2.33834	0.0537144	0.11805	-5.01479	FALSE	ns
952	ST0952	SUTs	SUT097	SUT097	0.551344	-5.53028	2.81755	0.0271804	0.0742509	-4.3104	FALSE	ns
953	ST0953	CUTs	CUT119	CUT119	-0.789988	-5.15999	-3.23066	0.0154177	0.0513125	-3.71111	FALSE	ns
954	ST0954	SUTs	SUT098	SUT098	-0.0798069	-1.57678	-0.447438	0.668716	0.751492	-7.18404	FALSE	ns
955	ST0955	ORF-T	YER164W	CHD1	-0.706466	-3.54487	-3.93527	0.00619742	0.0299851	-2.73183	TRUE	s
956	ST0956	ORF-T	YER165W	PAB1	-0.430168	0.273886	-2.24955	0.0610536	0.129177	-5.1447	FALSE	ns
957	ST0957	ORF-T	YER166W	DNF1	-0.815958	-3.04416	-4.22805	0.00433803	0.0245687	-2.34491	TRUE	s
958	ST0958	ORF-T	YER167W	BCK2	-0.435938	-3.31873	-2.1262	0.0729767	0.14668	-5.32399	FALSE	ns
959	ST0959	ORF-T	YER169W	RPH1	-0.865224	-3.3534	-4.97092	0.00185745	0.0154194	-1.41998	TRUE	s
960	ST0960	ORF-T	YER170W	ADK2	0.0621926	-4.69505	0.333928	0.748678	0.813931	-7.23364	FALSE	ns
961	ST0961	ORF-T	YER171W	RAD3	-0.414904	-3.60883	-2.33796	0.0537445	0.118076	-5.01536	FALSE	ns
962	ST0962	ORF-T	YER173W	RAD24	0.0846034	-4.85319	0.362254	0.728358	0.797444	-7.22256	FALSE	ns
963	ST0963	ORF-T	YER176W	ECM32	-0.4614	-4.0838	-2.3057	0.0563017	0.121998	-5.06262	FALSE	ns
964	ST0964	ORF-T	YER177W	BMH1	-0.50365	0.604014	-2.84094	0.0263067	0.072573	-4.27614	FALSE	ns
965	ST0965	ORF-T	YER178W	PDA1	-0.227507	0.580391	-1.34535	0.222417	0.330763	-6.38089	FALSE	ns
966	ST0966	ORF-T	YER179W	DMC1	0.187851	-6.42478	0.969558	0.366076	0.483755	-6.79374	FALSE	ns
967	ST0967	ORF-T	YER182W	FMP10	0.016092	-4.40142	0.0581322	0.955345	0.970289	-7.29499	FALSE	ns
968	ST0968	SUTs	SUT099	SUT099	-0.0301712	-4.4594	-0.151978	0.883695	0.918991	-7.28373	FALSE	ns
969	ST0969	ORF-T	YER185W	YER185W	1.228	-4.81248	4.70202	0.00250188	0.0177672	-1.74535	TRUE	s
970	ST0970	SUTs	SUT100	SUT100	0.137297	-6.59222	0.794385	0.454281	0.566061	-6.95191	FALSE	ns
971	ST0971	ORF-T	YER187W	YER187W	0.157934	-6.2074	0.91717	0.390986	0.507633	-6.84362	FALSE	ns
972	ST0972	other	YER188W, YERWomega2	YER188W, YERWomega2	-0.492591	-5.39717	-2.66927	0.0334822	0.0857048	-4.52813	FALSE	ns
973	ST0973	ORF-T	YFL055W	AGP3	1.44386	-5.06583	7.04236	0.000253745	0.00525707	0.757688	TRUE	s
974	ST0974	CUTs	CUT120	CUT120	1.27018	-6.09395	3.8629	0.00678223	0.0318607	-2.82937	TRUE	s
975	ST0975	ORF-T	YFL052W	YFL052W	0.513181	-5.96866	2.9451	0.0227627	0.0655833	-4.12397	FALSE	ns
976	ST0976	ORF-T	YFL049W	SWP82	-0.129181	-4.26125	-0.591924	0.573393	0.670669	-7.10151	FALSE	ns
977	ST0977	ORF-T	YFL047W	RGD2	-0.123802	-3.6706	-0.72633	0.492312	0.5998	-7.00639	FALSE	ns
978	ST0978	ORF-T	YFL046W	FMP32	-0.109422	-4.78861	-0.459392	0.660537	0.74518	-7.17802	FALSE	ns
979	ST0979	CUTs	CUT121	CUT121	0.38886	-6.30259	2.01955	0.0851626	0.16375	-5.47748	FALSE	ns
980	ST0980	ORF-T	YFL041W-A	YFL041W-A	-0.300428	-5.57474	-1.13498	0.295488	0.411016	-6.6231	FALSE	ns
981	ST0981	ORF-T	YFL041W	FET5	-0.397892	-2.02453	-2.31576	0.055491	0.120745	-5.04788	FALSE	ns
982	ST0982	SUTs	SUT101	SUT101	0.0125266	-6.28477	0.0701325	0.946143	0.962981	-7.29411	FALSE	ns
983	ST0983	ORF-T	YFL037W	TUB2	-0.608182	0.208502	-3.23397	0.0153493	0.0512019	-3.70638	FALSE	ns
984	ST0984	ORF-T	YFL036W	RPO41	-0.693481	-3.56055	-3.803	0.00731221	0.0330276	-2.91067	TRUE	s
985	ST0985	ORF-T	YFL034W	YFL034W	-0.634694	-4.67702	-2.9693	0.0220141	0.0641888	-4.08871	FALSE	ns
986	ST0986	ORF-T	YFL032W, YFL031W	YFL032W, HAC1	0.0160712	0.820919	0.0859509	0.934026	0.954218	-7.2927	FALSE	ns
987	ST0987	ORF-T	YFL030W	AGX1	-0.0442863	-4.75651	-0.254202	0.806991	0.861359	-7.26012	FALSE	ns
988	ST0988	SUTs	SUT102	SUT102	0.600665	-6.01021	3.0462	0.0198055	0.060287	-3.977	FALSE	ns
989	ST0989	ORF-T	YFL026W	STE2	-0.393663	0.487971	-2.2892	0.0576576	0.124196	-5.08676	FALSE	ns
990	ST0990	SUTs	SUT103	SUT103	-0.179947	-3.03826	-0.875385	0.411753	0.526049	-6.88186	FALSE	ns
991	ST0991	ORF-T	YFL023W	BUD27	-0.307388	-4.25034	-1.49175	0.181438	0.284051	-6.19857	FALSE	ns
992	ST0992	ORF-T	YFL021W	GAT1	0.516389	-4.57685	1.88668	0.103209	0.186886	-5.66597	FALSE	ns
993	ST0993	ORF-T	YFL021W	GAT1	-0.614138	-3.02179	-3.26096	0.014803	0.0499988	-3.66776	TRUE	s
994	ST0994	ORF-T	YFL017W-A	SMX2	0.202582	-2.26109	0.853106	0.423152	0.536727	-6.90168	FALSE	ns
995	ST0995	SUTs	SUT104	SUT104	-0.571913	-3.81224	-0.92754	0.385956	0.503078	-6.83392	FALSE	ns
996	ST0996	CUTs	CUT122	CUT122	0.0776162	-6.3183	0.336142	0.747082	0.812925	-7.2328	FALSE	ns
997	ST0997	ORF-T	YFL014W	HSP12	2.4856	-2.6935	14.5884	2.60405853913616e-06	0.000473418	5.593	TRUE	s
998	ST0998	SUTs	SUT105	SUT105	2.66703	-3.10991	8.73222	6.84442175119938e-05	0.00257091	2.17973	TRUE	s
999	ST0999	ORF-T	YFL009W	CDC4	-0.560801	-2.94844	-3.25323	0.0149572	0.050356	-3.67881	FALSE	ns
1000	ST1000	ORF-T	YFL008W	SMC1	-0.632097	-4.44625	-2.57704	0.038162	0.0936915	-4.66385	FALSE	ns
1001	ST1001	ORF-T	YFL007W	BLM10	-0.851187	-2.27082	-4.85119	0.0021182	0.016563	-1.56354	TRUE	s
1002	ST1002	ORF-T	YFL005W	SEC4	-0.110436	-1.34571	-0.591668	0.573555	0.670669	-7.10168	FALSE	ns
1003	ST1003	ORF-T	YFL004W	VTC2	-1.24585	-2.73938	-7.20419	0.000221477	0.00494043	0.906019	TRUE	s
1004	ST1004	ORF-T	YFL001W	DEG1	-0.528865	-4.08784	-2.86176	0.0255541	0.0711716	-4.24567	FALSE	ns
1005	ST1005	ORF-T	YFR001W	LOC1	0.567631	-2.79632	2.52524	0.0410857	0.0984108	-4.74011	FALSE	ns
1006	ST1006	ORF-T	YFR002W	NIC96	-0.242642	-3.07333	-1.42506	0.199176	0.304608	-6.28287	FALSE	ns
1007	ST1007	ORF-T	YFR004W	RPN11	-0.223015	-2.32245	-1.20268	0.270019	0.383437	-6.54799	FALSE	ns
1008	ST1008	ORF-T	YFR006W	YFR006W	-1.17082	-2.53597	-6.2376	0.000518722	0.00769752	-0.0237789	TRUE	s
1009	ST1009	ORF-T	YFR007W	YFR007W	-0.791453	-4.47227	-4.20476	0.00446075	0.0249144	-2.37522	TRUE	s
1010	ST1010	ORF-T	YFR008W	FAR7	-0.0621344	-5.33433	-0.282775	0.785916	0.844729	-7.25144	FALSE	ns
1011	ST1011	ORF-T	YFR009W, YFR009W-A	GCN20, YFR009W-A	-0.685803	-2.03901	-3.34964	0.0131509	0.0464465	-3.54145	TRUE	s
1012	ST1012	ORF-T	YFR010W	UBP6	-0.357177	-2.53683	-1.98654	0.0893306	0.168994	-5.52462	FALSE	ns
1013	ST1013	ORF-T	YFR012W, YFR012W-A	YFR012W, YFR012W-A	0.132189	-6.13335	0.767128	0.469263	0.579762	-6.97422	FALSE	ns
1014	ST1014	ORF-T	YFR013W	IOC3	-0.305659	-3.71081	-1.35703	0.218868	0.327227	-6.36673	FALSE	ns
1015	ST1015	ORF-T	YFR019W	FAB1	-0.252524	-4.55603	-1.12416	0.299741	0.415594	-6.63484	FALSE	ns
1016	ST1016	other	YFR020W	YFR020W	-0.113115	-3.71534	-0.617163	0.557582	0.656851	-7.08496	FALSE	ns
1017	ST1017	ORF-T	YFR021W	ATG18	-0.884858	-3.49098	-5.06639	0.00167511	0.0146287	-1.30699	TRUE	s
1018	ST1018	ORF-T	YFR022W	ROG3	0.218151	-3.29088	1.20189	0.270303	0.383764	-6.54888	FALSE	ns
1019	ST1019	ORF-T	YFR023W	PES4	0.0585266	-6.57857	0.326839	0.753798	0.81803	-7.23628	FALSE	ns
1020	ST1020	ORF-T	YFR027W	ECO1	-0.420553	-6.10921	-2.30671	0.0562195	0.121856	-5.06113	FALSE	ns
1021	ST1021	ORF-T	YFR029W	PTR3	-0.742762	-4.32684	-3.87977	0.00664072	0.0314601	-2.80657	TRUE	s
1022	ST1022	ORF-T	YFR030W	MET10	-0.198787	-2.87564	-1.04872	0.330784	0.448067	-6.71447	FALSE	ns
1023	ST1023	other	YFR034W-A	YFR034W-A	0.832864	-2.99779	3.72119	0.00811075	0.034983	-3.02251	TRUE	s
1024	ST1024	ORF-T	YFR036W	CDC26	0.268872	-3.97187	1.59261	0.15735	0.255698	-6.06752	FALSE	ns
1025	ST1025	SUTs	SUT106	SUT106	0.33577	-6.27821	1.96842	0.0917048	0.172186	-5.55042	FALSE	ns
1026	ST1026	ORF-T	YFR038W	IRC5	-0.446505	-3.69875	-2.53949	0.0402588	0.0971986	-4.71913	FALSE	ns
1027	ST1027	ORF-T	YFR040W	SAP155	-0.447222	-2.93591	-2.19191	0.0663569	0.137087	-5.22867	FALSE	ns
1028	ST1028	ORF-T	YFR042W	KEG1	-0.0137337	-2.61951	-0.0793344	0.939092	0.957795	-7.29333	FALSE	ns
1029	ST1029	ORF-T	YFR045W	YFR045W	-0.469376	-4.47421	-2.02982	0.0839047	0.16206	-5.46276	FALSE	ns
1030	ST1030	ORF-T	YFR048W	RMD8	-0.483394	-3.95477	-2.60227	0.0368177	0.0912848	-4.62672	FALSE	ns
1031	ST1031	ORF-T	YFR049W	YMR31	-0.777278	-3.22779	-4.61183	0.0027711	0.0186071	-1.85687	TRUE	s
1032	ST1032	ORF-T	YFR052W	RPN12	-0.211266	-1.4769	-1.09764	0.31037	0.426188	-6.66327	FALSE	ns
1033	ST1033	SUTs	SUT107	SUT107	0.334735	-6.0797	1.46545	0.188255	0.291895	-6.23205	FALSE	ns
1034	ST1034	CUTs	CUT123	CUT123	0.594331	-6.29335	2.58176	0.0379066	0.0931903	-4.6569	FALSE	ns
1035	ST1035	CUTs	CUT124	CUT124	-0.0553614	-5.3442	-0.177847	0.864119	0.905588	-7.27887	FALSE	ns
1036	ST1036	ORF-T	YFR055W	IRC7	-0.966905	-1.83307	-5.48349	0.00108196	0.0113439	-0.828653	TRUE	s
1037	ST1037	ORF-T	YGL263W	COS12	0.422253	-4.61686	1.93716	0.0959474	0.177947	-5.59477	FALSE	ns
1038	ST1038	ORF-T	YGL256W	ADH4	-0.624218	-2.32543	-3.51775	0.0105411	0.0407088	-3.30449	TRUE	s
1039	ST1039	SUTs	SUT108	SUT108	-0.284593	-6.12098	-1.4018	0.205722	0.31232	-6.31179	FALSE	ns
1040	ST1040	ORF-T	YGL255W	ZRT1	-0.475867	-3.59053	-2.6255	0.0356234	0.0892056	-4.59253	FALSE	ns
1041	ST1041	ORF-T	YGL254W	FZF1	-0.30832	-3.95056	-1.57301	0.161785	0.260692	-6.0933	FALSE	ns
1042	ST1042	ORF-T	YGL253W	HXK2	-0.30578	0.933661	-1.73755	0.127938	0.219322	-5.87278	FALSE	ns
1043	ST1043	SUTs	SUT109	SUT109	1.12186	-4.5262	6.12875	0.000574428	0.00800237	-0.135418	TRUE	s
1044	ST1044	ORF-T	YGL250W	RMR1	-0.103618	-4.67947	-0.533139	0.611218	0.704178	-7.13764	FALSE	ns
1045	ST1045	ORF-T	YGL249W	ZIP2	0.182793	-6.4958	1.08013	0.317556	0.433503	-6.68178	FALSE	ns
1046	ST1046	ORF-T	YGL248W	PDE1	-0.379736	-4.00808	-2.219	0.0638091	0.133148	-5.18925	FALSE	ns
1047	ST1047	ORF-T	YGL247W	BRR6	0.0971116	-3.51237	0.403766	0.699005	0.774636	-7.20475	FALSE	ns
1048	ST1048	ORF-T	YGL245W	GUS1	-0.650009	-0.250674	-3.74888	0.0078303	0.0342482	-2.98456	TRUE	s
1049	ST1049	ORF-T	YGL244W	RTF1	-0.258233	-3.4363	-1.50348	0.178472	0.280858	-6.18354	FALSE	ns
1050	ST1050	ORF-T	YGL243W	TAD1	0.63623	-4.39732	1.85613	0.107864	0.193056	-5.7088	FALSE	ns
1051	ST1051	ORF-T	YGL241W	KAP114	-0.608335	-3.91609	-2.93718	0.0230135	0.0660174	-4.13552	FALSE	ns
1052	ST1052	ORF-T	YGL240W	DOC1	-0.260995	-4.59488	-1.16208	0.285062	0.400187	-6.59337	FALSE	ns
1053	ST1053	ORF-T	YGL238W	CSE1	-0.815373	-1.65197	-3.90132	0.00646459	0.0309521	-2.7775	TRUE	s
1054	ST1054	ORF-T	YGL234W	ADE5%2C7	-0.900589	-0.350782	-5.19297	0.00146345	0.0135998	-1.15923	TRUE	s
1055	ST1055	ORF-T	YGL233W	SEC15	-0.427969	-3.46439	-2.49269	0.0430411	0.102019	-4.78801	FALSE	ns
1056	ST1056	ORF-T	YGL232W	TAN1	-0.386217	-3.28586	-1.93601	0.096106	0.17815	-5.59639	FALSE	ns
1057	ST1057	SUTs	SUT110	SUT110	1.14173	-5.12855	3.25336	0.0149547	0.050356	-3.67863	FALSE	ns
1058	ST1058	CUTs	CUT125	CUT125	1.58205	-5.47509	9.02643	5.57086510435515e-05	0.00231624	2.40136	TRUE	s
1059	ST1059	ORF-T	YGL228W	SHE10	-0.190845	-2.64498	-0.900555	0.399148	0.515993	-6.859	FALSE	ns
1060	ST1060	ORF-T	YGL227W	VID30	-0.549469	-5.01113	-1.99858	0.0877878	0.166857	-5.50745	FALSE	ns
1061	ST1061	ORF-T	YGL226W	YGL226W	0.544508	-4.05468	2.27544	0.0588135	0.12594	-5.10688	FALSE	ns
1062	ST1062	SUTs	SUT111	SUT111	0.454065	-3.99054	2.6888	0.032571	0.0839916	-4.49941	FALSE	ns
1063	ST1063	ORF-T	YGL225W	VRG4	-0.79898	-0.341113	-4.47067	0.00325947	0.0205504	-2.03383	TRUE	s
1064	ST1064	ORF-T	YGL220W	YGL220W	0.265562	-1.43627	1.47303	0.186267	0.289553	-6.22243	FALSE	ns
1065	ST1065	ORF-T	YGL216W	KIP3	-0.303774	-3.89629	-1.28844	0.240451	0.351291	-6.4489	FALSE	ns
1066	ST1066	ORF-T	YGL215W	CLG1	-0.410021	-0.351038	-2.13625	0.0719222	0.145123	-5.30944	FALSE	ns
1067	ST1067	ORF-T	YGL212W	VAM7	-0.238427	-5.44817	-1.2543	0.251866	0.363914	-6.48884	FALSE	ns
1068	ST1068	ORF-T	YGL211W	NCS6	-0.93167	-3.54158	-4.03334	0.00549155	0.0277323	-2.60084	TRUE	s
1069	ST1069	ORF-T	YGL210W	YPT32	-0.686404	-3.28894	-3.84347	0.00694939	0.0321974	-2.85569	TRUE	s
1070	ST1070	CUTs	CUT126	CUT126	-0.298712	-5.59855	-1.04664	0.331677	0.448736	-6.71662	FALSE	ns
1071	ST1071	ORF-T	YGL209W	MIG2	-0.549336	-2.00438	-2.82806	0.0267842	0.0734697	-4.29501	FALSE	ns
1072	ST1072	CUTs	CUT127	CUT127	0.314574	-5.98315	0.809536	0.446099	0.558161	-6.93923	FALSE	ns
1073	ST1073	ORF-T	YGL208W	SIP2	-0.163063	-4.80733	-0.921693	0.388787	0.506133	-6.8394	FALSE	ns
1074	ST1074	ORF-T	YGL207W	SPT16	-0.620679	-1.94337	-3.07272	0.0190997	0.058828	-3.93858	FALSE	ns
1075	ST1075	ORF-T	YGL205W	POX1	0.0507743	-6.55434	0.296599	0.775787	0.836893	-7.24691	FALSE	ns
1076	ST1076	ORF-T	YGL202W	ARO8	-0.690804	-0.0470838	-4.01858	0.00559185	0.0280248	-2.62046	TRUE	s
1077	ST1077	ORF-T	YGL198W	YIP4	-0.457952	-1.82482	-2.7116	0.0315397	0.0823543	-4.46589	FALSE	ns
1078	ST1078	ORF-T	YGL197W	MDS3	-0.517425	-2.97354	-2.69651	0.0322184	0.0833187	-4.48808	FALSE	ns
1079	ST1079	ORF-T	YGL196W	YGL196W	-1.30713	-3.32879	-7.51355	0.000171913	0.00436019	1.18193	TRUE	s
1080	ST1080	ORF-T	YGL195W	GCN1	-0.651876	-0.838657	-3.77212	0.00760307	0.0337543	-2.95278	TRUE	s
1081	ST1081	ORF-T	YGL192W	IME4	0.0323584	-6.64538	0.190894	0.854284	0.897999	-7.27613	FALSE	ns
1082	ST1082	ORF-T	YGL191W	COX13	-0.900518	-1.66227	-3.0825	0.0188462	0.0582198	-3.92443	FALSE	ns
1083	ST1083	CUTs	CUT128	CUT128	0.0658834	-6.09574	0.269769	0.795487	0.852583	-7.2555	FALSE	ns
1084	ST1084	CUTs	CUT129	CUT129	0.148937	-5.89965	0.454083	0.664164	0.74811	-7.18071	FALSE	ns
1085	ST1085	ORF-T	YGL181W	GTS1	-0.463938	-3.56545	-2.48431	0.0435602	0.102619	-4.80035	FALSE	ns
1086	ST1086	ORF-T	YGL180W	ATG1	-0.0968118	-4.47958	-0.476645	0.648822	0.734927	-7.16908	FALSE	ns
1087	ST1087	CUTs	CUT130	CUT130	0.439964	-4.45585	1.78803	0.118987	0.207898	-5.80343	FALSE	ns
1088	ST1088	ORF-T	YGL178W, YGL177W	MPT5, YGL177W	-0.775048	-1.47291	-4.54713	0.00298404	0.0194444	-1.93761	TRUE	s
1089	ST1089	ORF-T	YGL174W	BUD13	-1.47502	-5.48695	-8.68794	7.06350178039602e-05	0.0025812	2.14576	TRUE	s
1090	ST1090	ORF-T	YGL172W	NUP49	-0.822052	-2.9487	-4.26678	0.00414205	0.0238111	-2.29466	TRUE	s
1091	ST1091	ORF-T	YGL171W	ROK1	-0.838268	-3.68923	-4.41213	0.00348941	0.0213594	-2.10809	TRUE	s
1092	ST1092	CUTs	CUT131	CUT131	0.211862	-5.83561	1.13498	0.295487	0.411016	-6.62309	FALSE	ns
1093	ST1093	ORF-T	YGL169W, YGL168W	SUA5, HUR1	-0.582401	-2.9531	-2.79641	0.0279966	0.0759721	-4.34139	FALSE	ns
1094	ST1094	ORF-T	YGL166W	CUP2	0.092748	-3.68476	0.438091	0.675145	0.756313	-7.18864	FALSE	ns
1095	ST1095	SUTs	SUT112	SUT112	0.00809226	-5.17357	0.0371962	0.971416	0.980994	-7.29614	FALSE	ns
1096	ST1096	ORF-T	YGL162W	SUT1	-0.540644	-3.38983	-2.33831	0.0537168	0.11805	-5.01483	FALSE	ns
1097	ST1097	ORF-T	YGL160W	YGL160W	-0.551965	-2.94558	-3.16089	0.0169404	0.0546058	-3.8113	FALSE	ns
1098	ST1098	ORF-T	YGL159W	YGL159W	-0.536726	-4.07945	-2.64901	0.0344563	0.0872706	-4.55794	FALSE	ns
1099	ST1099	other	YGLWtau2	YGLWtau2	0.670115	-5.40298	2.47394	0.0442115	0.103445	-4.81561	FALSE	ns
1100	ST1100	ORF-T	YGL158W	RCK1	0.00513053	-6.33582	0.0287939	0.977871	0.985869	-7.29645	FALSE	ns
1101	ST1101	ORF-T	YGL157W	YGL157W	-1.09661	-2.58767	-6.18216	0.000546292	0.00785106	-0.0804511	TRUE	s
1102	ST1102	ORF-T	YGL156W	AMS1	-0.274401	-5.65628	-1.22831	0.260871	0.373731	-6.51882	FALSE	ns
1103	ST1103	ORF-T	YGL155W	CDC43	-0.294455	-3.39576	-1.22073	0.263548	0.376378	-6.52748	FALSE	ns
1104	ST1104	ORF-T	YGL153W	PEX14	-0.657702	-4.53905	-2.82879	0.0267569	0.0734249	-4.29394	FALSE	ns
1105	ST1105	ORF-T	YGL151W	NUT1	-0.56714	-3.04285	-3.2207	0.0156259	0.0518155	-3.72539	FALSE	ns
1106	ST1106	CUTs	CUT132	CUT132	0.391595	-6.18331	1.55919	0.164982	0.264612	-6.11139	FALSE	ns
1107	ST1107	ORF-T	YGL148W	ARO2	-0.87558	-1.29282	-5.03246	0.00173752	0.014865	-1.34699	TRUE	s
1108	ST1108	CUTs	CUT133	CUT133	1.34876	-5.28106	5.93718	0.000689641	0.00884492	-0.335531	TRUE	s
1109	ST1109	ORF-T	YGL145W	TIP20	-0.0227497	-3.43327	-0.133511	0.897725	0.92876	-7.28674	FALSE	ns
1110	ST1110	ORF-T	YGL141W	HUL5	-0.197531	-4.3684	-0.881912	0.408457	0.5234	-6.87598	FALSE	ns
1111	ST1111	ORF-T	YGL139W	FLC3	-0.695467	-2.16767	-3.38472	0.0125533	0.0451249	-3.49172	TRUE	s
1112	ST1112	ORF-T	YGL137W	SEC27	-1.06517	-1.7714	-6.25262	0.000511526	0.00765394	-0.00848996	TRUE	s
1113	ST1113	ORF-T	YGL135W	RPL1B	-0.0200546	1.57328	-0.105628	0.918981	0.94297	-7.29055	FALSE	ns
1114	ST1114	ORF-T	YGL134W	PCL10	-0.999342	-4.64571	-5.86469	0.000739858	0.00914015	-0.412489	TRUE	s
1115	ST1115	other	YGL133W, YGL132W	ITC1, YGL132W	-0.735361	-4.68406	-3.98879	0.00580059	0.0285979	-2.66017	TRUE	s
1116	ST1116	ORF-T	YGL130W	CEG1	-0.321461	-3.59138	-1.89116	0.102544	0.186099	-5.65967	FALSE	ns
1117	ST1117	CUTs	CUT134	CUT134	0.571664	-6.349	2.76665	0.0291894	0.0781249	-4.38504	FALSE	ns
1118	ST1118	ORF-T	YGL126W	SCS3	-0.526193	-3.72477	-2.92221	0.0234955	0.0670035	-4.15735	FALSE	ns
1119	ST1119	ORF-T	YGL125W	MET13	0.0810772	-2.71444	0.413379	0.692284	0.769534	-7.20036	FALSE	ns
1120	ST1120	ORF-T	YGL123W	RPS2	-0.333557	1.64136	-1.75206	0.125301	0.216061	-5.85292	FALSE	ns
1121	ST1121	CUTs	CUT135	CUT135	0.734252	-4.20063	3.47192	0.0111917	0.0420818	-3.36875	TRUE	s
1122	ST1122	ORF-T	YGL119W	ABC1	-0.142171	-4.2657	-0.726303	0.492327	0.5998	-7.00641	FALSE	ns
1123	ST1123	CUTs	CUT136	CUT136	-0.0440279	-6.28438	-0.178856	0.863358	0.90492	-7.27866	FALSE	ns
1124	ST1124	ORF-T	YGL117W	YGL117W	-1.12809	-5.1864	-3.3851	0.0125471	0.0451249	-3.49119	TRUE	s
1125	ST1125	ORF-T	YGL116W	CDC20	-0.344112	-4.06068	-1.68074	0.138784	0.232973	-5.94994	FALSE	ns
1126	ST1126	ORF-T	YGL115W	SNF4	-1.03052	-2.22114	-5.07606	0.00165779	0.0146052	-1.29563	TRUE	s
1127	ST1127	ORF-T	YGL114W	YGL114W	-0.863375	-2.74517	-4.98544	0.00182834	0.0152958	-1.40271	TRUE	s
1128	ST1128	ORF-T	YGL113W	SLD3	0.111777	-4.43563	0.583587	0.578673	0.675576	-7.10684	FALSE	ns
1129	ST1129	ORF-T	YGL111W	NSA1	-0.410292	-2.49315	-1.93887	0.0957101	0.177779	-5.59235	FALSE	ns
1130	ST1130	ORF-T	YGL106W	MLC1	-0.0160338	-1.86056	-0.0833916	0.935986	0.955296	-7.29295	FALSE	ns
1131	ST1131	ORF-T	YGL105W	ARC1	-0.615811	-0.395976	-3.04438	0.0198547	0.0603359	-3.97963	FALSE	ns
1132	ST1132	SUTs	SUT113	SUT113	0.200159	-6.29344	1.13689	0.294744	0.410452	-6.62102	FALSE	ns
1133	ST1133	ORF-T	YGL103W	RPL28	-0.472406	1.09432	-2.30188	0.0566126	0.122536	-5.06821	FALSE	ns
1134	ST1134	ORF-T	YGL101W	YGL101W	-1.19745	-3.24775	-5.25195	0.0013752	0.0130384	-1.09116	TRUE	s
1135	ST1135	ORF-T	YGL100W	SEH1	-0.418838	-2.50648	-2.43645	0.046651	0.107191	-4.87075	FALSE	ns
1136	ST1136	ORF-T	YGL099W	LSG1	-0.51604	-3.03684	-2.14688	0.0708238	0.143944	-5.29404	FALSE	ns
1137	ST1137	other	snR82	SNR82	0.355976	0.96486	1.01964	0.343425	0.460602	-6.74413	FALSE	ns
1138	ST1138	ORF-T	YGL098W	USE1	2.21692	-3.34004	12.8147	6.02503764916099e-06	0.000800241	4.744	TRUE	s
1139	ST1139	SUTs	SUT114	SUT114	2.27615	-4.23678	9.98876	2.9526070851508e-05	0.00169191	3.0806	TRUE	s
1140	ST1140	ORF-T	YGL097W	SRM1	-0.502238	-2.70421	-2.25894	0.0602312	0.127697	-5.13099	FALSE	ns
1141	ST1141	SUTs	SUT115	SUT115	0.610932	-4.41027	3.19949	0.0160791	0.0528126	-3.75582	FALSE	ns
1142	ST1142	ORF-T	YGL096W	TOS8	-0.186196	-4.49154	-0.836459	0.431817	0.544944	-6.91621	FALSE	ns
1143	ST1143	other	tE(UUC)G1	SOE1	0.846109	-3.66466	4.10381	0.00503899	0.0265533	-2.50757	TRUE	s
1144	ST1144	ORF-T	YGL093W	SPC105	-0.17238	-4.59955	-0.981834	0.360419	0.477842	-6.78175	FALSE	ns
1145	ST1145	ORF-T	YGL092W	NUP145	-0.737563	-2.69515	-4.04229	0.00543166	0.0276205	-2.58896	TRUE	s
1146	ST1146	ORF-T	YGL090W	LIF1	-0.514607	-5.84249	-2.99441	0.0212655	0.0628466	-4.05219	FALSE	ns
1147	ST1147	other	YGL088W, snR10	YGL088W, SNR10	-0.0604861	1.181	-0.30437	0.770115	0.831518	-7.24427	FALSE	ns
1148	ST1148	CUTs	CUT137	CUT137	3.59079	-3.76743	14.8607	2.3092020902027e-06	0.000460545	5.71259	TRUE	s
1149	ST1149	CUTs	CUT138	CUT138	3.76095	-4.23685	17.2675	8.6718970971631e-07	0.000277452	6.66505	TRUE	s
1150	ST1150	ORF-T	YGL086W	MAD1	0.395102	-3.77114	2.05837	0.0805066	0.157124	-5.42179	FALSE	ns
1151	ST1151	ORF-T	YGL085W	YGL085W	-0.475454	-4.78159	-2.72056	0.031144	0.0817024	-4.45272	FALSE	ns
1152	ST1152	ORF-T	YGL083W	SCY1	-0.68691	-3.46988	-3.6756	0.0085967	0.0359546	-3.08522	TRUE	s
1153	ST1153	ORF-T	YGL082W	YGL082W	-0.53059	-3.16313	-3.11011	0.01815	0.0569092	-3.88452	FALSE	ns
1154	ST1154	ORF-T	YGL081W	YGL081W	-0.178751	-6.23739	-1.01454	0.34568	0.462859	-6.74926	FALSE	ns
1155	ST1155	ORF-T	YGL080W	FMP37	0.276923	-2.31991	0.920551	0.389341	0.506562	-6.84047	FALSE	ns
1156	ST1156	ORF-T	YGL079W	YGL079W	-0.0627656	-3.62804	-0.349354	0.737584	0.804275	-7.22771	FALSE	ns
1157	ST1157	CUTs	CUT139	CUT139	1.11137	-5.5453	6.44929	0.00042698	0.00699324	0.189152	TRUE	s
1158	ST1158	SUTs	SUT116	SUT116	-0.841693	-6.11101	-3.54575	0.0101639	0.0399092	-3.26537	TRUE	s
1159	ST1159	CUTs	CUT140	CUT140	1.064	-5.81365	5.22833	0.00140981	0.0132456	-1.11836	TRUE	s
1160	ST1160	ORF-T	YGL073W	HSF1	0.0290497	-3.89944	0.119125	0.908682	0.936233	-7.28881	FALSE	ns
1161	ST1161	ORF-T	YGL071W	AFT1	0.0281655	-2.83351	0.143229	0.890336	0.924116	-7.2852	FALSE	ns
1162	ST1162	ORF-T	YGL068W	MNP1	-0.736603	-1.81597	-4.04533	0.00541146	0.0275768	-2.58492	TRUE	s
1163	ST1163	CUTs	CUT141	CUT141	0.910795	-5.70886	1.98501	0.0895282	0.16928	-5.52679	FALSE	ns
1164	ST1164	ORF-T	YGL067W	NPY1	-0.616316	-2.41115	-3.648	0.00890636	0.0367583	-3.12333	TRUE	s
1165	ST1165	ORF-T	YGL066W	SGF73	-0.291787	-4.31375	-1.61988	0.15137	0.247911	-6.03143	FALSE	ns
1166	ST1166	ORF-T	YGL063W	PUS2	0.0549961	-4.58651	0.318234	0.760031	0.822707	-7.2394	FALSE	ns
1167	ST1167	ORF-T	YGL062W	PYC1	-0.853811	-2.57045	-5.05148	0.00170223	0.0147087	-1.32456	TRUE	s
1168	ST1168	SUTs	SUT117	SUT117	0.934584	-5.91406	3.57521	0.00978287	0.0390027	-3.22431	TRUE	s
1169	ST1169	ORF-T	YGL060W	YBP2	-0.454935	-4.01036	-1.57422	0.161508	0.260533	-6.09171	FALSE	ns
1170	ST1170	ORF-T	YGL059W	YGL059W	-0.418783	-4.92234	-2.2628	0.0598962	0.127357	-5.12534	FALSE	ns
1171	ST1171	ORF-T	YGL058W	RAD6	-0.0409293	-2.4838	-0.21831	0.833711	0.882624	-7.26975	FALSE	ns
1172	ST1172	ORF-T	YGL055W	OLE1	-0.2336	0.731011	-1.36095	0.217686	0.326011	-6.36195	FALSE	ns
1173	ST1173	ORF-T	YGL050W	TYW3	-0.13469	-3.629	-0.753442	0.476912	0.586819	-6.98517	FALSE	ns
1174	ST1174	ORF-T	YGL047W	ALG13	0.102394	-3.98076	0.442178	0.67233	0.754155	-7.18664	FALSE	ns
1175	ST1175	ORF-T	YGL045W	RIM8	0.867868	-5.0421	4.87724	0.00205817	0.0163174	-1.53213	TRUE	s
1176	ST1176	ORF-T	YGL043W	DST1	-0.0487199	-2.82009	-0.279334	0.788445	0.847033	-7.25253	FALSE	ns
1177	ST1177	other	YGL041W-A	YGL041W-A	-0.723241	-4.28307	-4.00368	0.0056952	0.0283165	-2.64031	TRUE	s
1178	ST1178	CUTs	CUT142	CUT142	1.49519	-5.48501	7.82553	0.000134288	0.00377043	1.45042	TRUE	s
1179	ST1179	SUTs	SUT118	SUT118	1.48897	-5.36821	5.34945	0.00124205	0.0123898	-0.979706	TRUE	s
1180	ST1180	ORF-T	YGL039W	YGL039W	-0.296513	-1.74329	-1.73268	0.128835	0.220081	-5.87943	FALSE	ns
1181	ST1181	CUTs	CUT143	CUT143	1.77416	-4.14571	6.49155	0.000410945	0.00682281	0.231014	TRUE	s
1182	ST1182	ORF-T	YGL036W	YGL036W	-0.519465	-2.98893	-2.91235	0.023819	0.0676872	-4.17175	FALSE	ns
1183	ST1183	SUTs	SUT119	SUT119	0.297616	-4.42561	1.61675	0.152046	0.248824	-6.03559	FALSE	ns
1184	ST1184	ORF-T	YGL030W	RPL30	-0.0407246	1.44314	-0.198794	0.848343	0.894209	-7.27438	FALSE	ns
1185	ST1185	ORF-T	YGL029W	CGR1	0.18399	-2.93552	0.909163	0.394904	0.511589	-6.85106	FALSE	ns
1186	ST1186	ORF-T	YGL022W	STT3	-0.835064	-1.3305	-4.82705	0.00217557	0.0167853	-1.59274	TRUE	s
1187	ST1187	ORF-T	YGL021W	ALK1	-0.0337939	-3.30801	-0.156571	0.880213	0.916773	-7.28292	FALSE	ns
1188	ST1188	ORF-T	YGL019W	CKB1	-0.555594	-2.15438	-3.17128	0.0167038	0.0541553	-3.79636	FALSE	ns
1189	ST1189	ORF-T	YGL017W	ATE1	-0.164901	-4.56617	-0.831216	0.434572	0.547061	-6.92074	FALSE	ns
1190	ST1190	ORF-T	YGL016W	KAP122	-0.833757	-2.60445	-4.80789	0.00222235	0.0169152	-1.61598	TRUE	s
1191	ST1191	ORF-T	YGL014W	PUF4	-0.764343	-1.33591	-4.2872	0.00404274	0.0234254	-2.26827	TRUE	s
1192	ST1192	ORF-T	YGL012W	ERG4	-0.358403	-0.101116	-2.01607	0.0855918	0.164379	-5.48245	FALSE	ns
1193	ST1193	ORF-T	YGL010W	YGL010W	-0.279904	-3.38299	-0.963152	0.369055	0.486722	-6.79996	FALSE	ns
1194	ST1194	SUTs	SUT120	SUT120	1.38333	-4.04903	6.71246	0.00033745	0.00610985	0.446404	TRUE	s
1195	ST1195	CUTs	CUT144	CUT144	0.585342	-4.43787	3.15544	0.0170659	0.0548887	-3.81915	FALSE	ns
1196	ST1196	other	YGL006W-A, YGL006W	YGL006W-A, PMC1	-0.726792	-3.90586	-3.88667	0.0065838	0.0312889	-2.79726	TRUE	s
1197	ST1197	ORF-T	YGL002W	ERP6	-0.728733	-2.55588	-3.32934	0.0135107	0.047032	-3.57029	TRUE	s
1198	ST1198	ORF-T	YGR003W	CUL3	-0.27126	-4.26481	-1.20276	0.26999	0.383437	-6.5479	FALSE	ns
1199	ST1199	ORF-T	YGR004W	PEX31	-0.641321	-3.60372	-3.65214	0.00885918	0.036667	-3.11761	TRUE	s
1200	ST1200	ORF-T	YGR006W	PRP18	0.0457216	-4.79777	0.190266	0.854757	0.898366	-7.27626	FALSE	ns
1201	ST1201	ORF-T	YGR007W	MUQ1	-0.176842	-2.86417	-0.853829	0.422779	0.536459	-6.90104	FALSE	ns
1202	ST1202	CUTs	CUT145	CUT145	0.226113	-5.79232	0.625713	0.552286	0.652304	-7.07921	FALSE	ns
1203	ST1203	ORF-T	YGR010W, YGR011W	NMA2, YGR011W	-1.31802	-4.57991	-7.68118	0.000150393	0.00404744	1.32737	TRUE	s
1204	ST1204	ORF-T	YGR012W	YGR012W	-0.8725	-4.76101	-5.00698	0.0017861	0.0151558	-1.37715	TRUE	s
1205	ST1205	ORF-T	YGR013W	SNU71	-0.2992	-4.64384	-1.69359	0.136256	0.229736	-5.93256	FALSE	ns
1206	ST1206	ORF-T	YGR014W	MSB2	-1.43691	-0.990863	-7.85274	0.000131476	0.00372021	1.4734	TRUE	s
1207	ST1207	ORF-T	YGR016W	YGR016W	-0.0691925	-5.60258	-0.305322	0.769421	0.831015	-7.24395	FALSE	ns
1208	ST1208	ORF-T	YGR017W	YGR017W	-0.805405	-2.55297	-4.69789	0.00251354	0.0177979	-1.75042	TRUE	s
1209	ST1209	SUTs	SUT121	SUT121	1.13991	-4.82164	2.12034	0.0735978	0.14752	-5.33246	FALSE	ns
1210	ST1210	ORF-T	YGR019W	UGA1	-0.910829	-3.4903	-4.92834	0.00194584	0.0157898	-1.47079	TRUE	s
1211	ST1211	ORF-T	YGR021W	YGR021W	-0.334761	-4.81859	-1.01515	0.345406	0.462663	-6.74864	FALSE	ns
1212	ST1212	ORF-T	YGR023W	MTL1	-0.484608	-2.2784	-2.59426	0.0372392	0.0920473	-4.63851	FALSE	ns
1213	ST1213	other	YGR025W, YGR026W	YGR025W, YGR026W	-0.257707	-0.954798	-1.0501	0.330196	0.447565	-6.71305	FALSE	ns
1214	ST1214	ORF-T	YGR028W	MSP1	-0.642768	-4.18253	-3.73064	0.00801382	0.0347091	-3.00954	TRUE	s
1215	ST1215	ORF-T	YGR029W	ERV1	0.076465	-3.34575	0.367148	0.724871	0.79533	-7.22055	FALSE	ns
1216	ST1216	CUTs	CUT146	CUT146	2.57673	-3.49502	15.0384	2.13745823179072e-06	0.000457165	5.7892	TRUE	s
1217	ST1217	other	snR46	SNR46	2.7927	-1.67009	11.0693	1.53985391819172e-05	0.00127248	3.76923	TRUE	s
1218	ST1218	CUTs	CUT147	CUT147	3.47717	-4.21591	12.6605	6.5137382068458e-06	0.000800241	4.66391	TRUE	s
1219	ST1219	ORF-T	YGR031W	YGR031W	-0.146991	-4.07462	-0.868748	0.415125	0.529426	-6.88781	FALSE	ns
1220	ST1220	ORF-T	YGR032W	GSC2	1.58926	-1.83297	8.91531	6.0171615271516e-05	0.00237809	2.31847	TRUE	s
1221	ST1221	ORF-T	YGR034W	RPL26B	1.73925	-3.01175	8.27984	9.50589992840359e-05	0.00299251	1.82494	TRUE	s
1222	ST1222	SUTs	SUT122	SUT122	0.704731	-3.10539	2.18796	0.066738	0.137562	-5.23443	FALSE	ns
1223	ST1223	CUTs	CUT148	CUT148	0.425833	-5.36274	2.0995	0.0758527	0.150823	-5.36257	FALSE	ns
1224	ST1224	ORF-T	YGR038W	ORM1	-0.852176	-1.6698	-4.71972	0.00245253	0.0176098	-1.7236	TRUE	s
1225	ST1225	other	YGR039W, YGR040W	YGR039W, KSS1	1.04799	-4.01971	4.80846	0.00222094	0.0169152	-1.61528	TRUE	s
1226	ST1226	ORF-T	YGR040W	KSS1	-0.241195	-3.56422	-1.23	0.260279	0.373175	-6.51689	FALSE	ns
1227	ST1227	ORF-T	YGR041W	BUD9	-1.5011	-3.28013	-7.89848	0.0001269	0.00363315	1.51185	TRUE	s
1228	ST1228	ORF-T	YGR042W	YGR042W	-0.0960355	-4.19561	-0.533488	0.610989	0.704026	-7.13743	FALSE	ns
1229	ST1229	ORF-T	YGR046W	TAM41	-0.310192	-3.84271	-1.30145	0.236218	0.346536	-6.4335	FALSE	ns
1230	ST1230	ORF-T	YGR048W	UFD1	-0.106671	-3.24598	-0.603028	0.566404	0.665196	-7.0943	FALSE	ns
1231	ST1231	ORF-T	YGR049W	SCM4	-0.195888	-3.84658	-0.945815	0.377211	0.494748	-6.81661	FALSE	ns
1232	ST1232	ORF-T	YGR052W	FMP48	-2.41823	-5.14684	-11.2221	1.41100085909753e-05	0.00122451	3.86096	TRUE	s
1233	ST1233	ORF-T	YGR054W	YGR054W	-0.50671	-0.839932	-2.84109	0.0263014	0.072573	-4.27593	FALSE	ns
1234	ST1234	ORF-T	YGR055W	MUP1	-0.523887	-0.662526	-2.88798	0.0246387	0.0692855	-4.20734	FALSE	ns
1235	ST1235	ORF-T	YGR056W	RSC1	-0.429889	-3.48418	-2.33967	0.0536122	0.117999	-5.01285	FALSE	ns
1236	ST1236	CUTs	CUT149	CUT149	1.78771	-5.11013	7.71463	0.000146474	0.00401947	1.35607	TRUE	s
1237	ST1237	ORF-T	YGR058W	PEF1	-0.238156	-4.09432	-1.27823	0.243816	0.354889	-6.46091	FALSE	ns
1238	ST1238	ORF-T	YGR059W	SPR3	0.197565	-6.62009	1.14851	0.290245	0.405507	-6.60832	FALSE	ns
1239	ST1239	other	snR48	SNR48	1.01542	0.829987	3.58217	0.00969503	0.0387375	-3.21461	TRUE	s
1240	ST1240	CUTs	CUT150	CUT150	4.71897	-3.4097	12.7662	6.17405574879937e-06	0.000800241	4.71893	TRUE	s
1241	ST1241	ORF-T	YGR060W	ERG25	-0.0506109	0.836788	-0.285604	0.78384	0.843332	-7.25053	FALSE	ns
1242	ST1242	CUTs	CUT151	CUT151	0.860849	-5.49976	4.33547	0.00381818	0.0226475	-2.2061	TRUE	s
1243	ST1243	SUTs	SUT123	SUT123	-0.375686	-5.71102	-2.15346	0.0701526	0.142979	-5.2845	FALSE	ns
1244	ST1244	SUTs	SUT124	SUT124	0.365489	-6.37571	1.5529	0.166458	0.266567	-6.1196	FALSE	ns
1245	ST1245	ORF-T	YGR070W	ROM1	0.247856	-4.63181	1.01166	0.346956	0.46414	-6.75215	FALSE	ns
1246	ST1246	ORF-T	YGR072W	UPF3	0.036701	-4.12612	0.182385	0.860695	0.90278	-7.27794	FALSE	ns
1247	ST1247	ORF-T	YGR074W	SMD1	-0.178497	-2.64407	-0.87093	0.414014	0.528381	-6.88586	FALSE	ns
1248	ST1248	ORF-T	YGR079W	YGR079W	0.353568	-2.43078	1.60865	0.153807	0.25095	-6.04633	FALSE	ns
1249	ST1249	ORF-T	YGR080W	TWF1	0.0755871	-3.14467	0.416102	0.690386	0.767893	-7.1991	FALSE	ns
1250	ST1250	ORF-T	YGR082W	TOM20	-0.654819	-0.626765	-3.78529	0.00747748	0.0333801	-2.9348	TRUE	s
1251	ST1251	SUTs	SUT125	SUT125	-0.0342966	-6.44937	-0.156584	0.880203	0.916773	-7.28292	FALSE	ns
1252	ST1252	ORF-T	YGR088W	CTT1	-0.789606	-5.17433	-4.47674	0.0032366	0.0205504	-2.02616	TRUE	s
1253	ST1253	ORF-T	YGR089W	NNF2	-0.616365	-2.68912	-3.40011	0.0123006	0.0445978	-3.46996	TRUE	s
1254	ST1254	SUTs	SUT126	SUT126	0.456822	-5.00345	1.88144	0.103994	0.1877	-5.67334	FALSE	ns
1255	ST1255	ORF-T	YGR090W	UTP22	-0.758485	-1.6126	-4.00402	0.00569285	0.0283165	-2.63986	TRUE	s
1256	ST1256	ORF-T	YGR091W	PRP31	-0.190065	-4.63902	-0.955291	0.372736	0.49024	-6.80754	FALSE	ns
1257	ST1257	ORF-T	YGR092W	DBF2	-0.481136	-3.80104	-2.66865	0.0335117	0.0857182	-4.52904	FALSE	ns
1258	ST1258	ORF-T	YGR093W	YGR093W	-0.696573	-3.93791	-3.92907	0.00624531	0.0301767	-2.74016	TRUE	s
1259	ST1259	ORF-T	YGR094W	VAS1	-0.900998	-0.501424	-5.06708	0.00167388	0.0146287	-1.30619	TRUE	s
1260	ST1260	ORF-T	YGR096W	TPC1	0.039762	-3.80415	0.197393	0.849395	0.894692	-7.27469	FALSE	ns
1261	ST1261	CUTs	CUT152	CUT152	-0.105389	-4.05471	-0.363518	0.727456	0.796696	-7.22204	FALSE	ns
1262	ST1262	ORF-T	YGR097W	ASK10	-0.0988224	-2.73886	-0.580229	0.580808	0.677191	-7.10897	FALSE	ns
1263	ST1263	ORF-T	YGR099W	TEL2	-0.450345	-4.86892	-2.13127	0.0724422	0.145847	-5.31665	FALSE	ns
1264	ST1264	ORF-T	YGR100W	MDR1	-1.38322	-4.67151	-5.97385	0.000665704	0.00866011	-0.296855	TRUE	s
1265	ST1265	ORF-T	YGR101W	PCP1	-0.442959	-2.60905	-2.53548	0.04049	0.0974898	-4.72504	FALSE	ns
1266	ST1266	ORF-T	YGR103W	NOP7	-0.503644	-1.45187	-2.49963	0.0426162	0.101276	-4.7778	FALSE	ns
1267	ST1267	ORF-T	YGR105W	VMA21	-0.0501965	-2.00155	-0.276305	0.790672	0.848761	-7.25348	FALSE	ns
1268	ST1268	CUTs	CUT153	CUT153	-0.624399	-5.0177	-2.35639	0.0523373	0.116036	-4.98833	FALSE	ns
1269	ST1269	other	tL(GAG)G	tL(GAG)G	1.08251	-4.56148	4.65317	0.00264388	0.0181895	-1.8056	TRUE	s
1270	ST1270	other	YGR107W	YGR107W	1.34825	-5.19058	4.64873	0.00265724	0.0182469	-1.81109	TRUE	s
1271	ST1271	ORF-T	YGR108W	CLB1	-0.909192	-3.58697	-4.91685	0.00197048	0.0158862	-1.48455	TRUE	s
1272	ST1272	ORF-T	YGR110W	YGR110W	0.965732	-5.46725	3.3611	0.0129524	0.0459356	-3.52519	TRUE	s
1273	ST1273	ORF-T	YGR111W	YGR111W	-0.308792	-3.34063	-1.31489	0.231914	0.34153	-6.4175	FALSE	ns
1274	ST1274	ORF-T	YGR112W	SHY1	-0.359175	-5.04494	-1.77486	0.121261	0.210657	-5.82159	FALSE	ns
1275	ST1275	ORF-T	YGR113W	DAM1	-0.212754	-3.94268	-0.879996	0.409422	0.524268	-6.87771	FALSE	ns
1276	ST1276	ORF-T	YGR116W	SPT6	-0.890732	-2.16272	-4.89613	0.00201582	0.0161502	-1.50941	TRUE	s
1277	ST1277	ORF-T	YGR118W	RPS23A	1.86617	-3.15313	2.93031	0.0232333	0.0664643	-4.14553	FALSE	ns
1278	ST1278	SUTs	SUT127	SUT127	1.08207	-4.62677	4.8916	0.00202588	0.0161886	-1.51485	TRUE	s
1279	ST1279	CUTs	CUT154	CUT154	1.91946	-5.58737	10.285	2.45500961506028e-05	0.0015799	3.27671	TRUE	s
1280	ST1280	SUTs	SUT128	SUT128	-0.606761	-3.5428	-3.32936	0.0135103	0.047032	-3.57026	TRUE	s
1281	ST1281	ORF-T	YGR121W-A	YGR121W-A	0.615232	-6.05889	2.28695	0.0578443	0.124525	-5.09004	FALSE	ns
1282	ST1282	ORF-T	YGR122W	YGR122W	-0.357252	-4.01509	-1.95925	0.0929297	0.173858	-5.56345	FALSE	ns
1283	ST1283	SUTs	SUT129	SUT129	0.263459	-5.51951	1.28321	0.242169	0.352986	-6.45506	FALSE	ns
1284	ST1284	CUTs	CUT155	CUT155	1.61848	-4.25366	4.04118	0.00543902	0.0276205	-2.59042	TRUE	s
1285	ST1285	ORF-T	YGR124W	ASN2	-0.323387	0.152948	-1.85418	0.108167	0.193449	-5.71151	FALSE	ns
1286	ST1286	ORF-T	YGR125W	YGR125W	-0.542423	-3.37605	-3.17022	0.0167276	0.0542083	-3.79787	FALSE	ns
1287	ST1287	ORF-T	YGR126W	YGR126W	-0.266803	-4.91976	-1.0596	0.326153	0.443158	-6.70322	FALSE	ns
1288	ST1288	ORF-T	YGR127W	YGR127W	-0.24777	-3.77441	-1.18649	0.275933	0.389704	-6.5662	FALSE	ns
1289	ST1289	ORF-T	YGR129W	SYF2	0.233323	-4.73298	0.960386	0.370347	0.48798	-6.80263	FALSE	ns
1290	ST1290	SUTs	SUT130	SUT130	0.0589114	-5.20661	0.283345	0.785498	0.844616	-7.25125	FALSE	ns
1291	ST1291	ORF-T	YGR131W	YGR131W	1.27271	-3.98729	7.29761	0.00020498	0.00468747	0.990376	TRUE	s
1292	ST1292	ORF-T	YGR133W	PEX4	-0.170439	-3.5758	-0.861061	0.419056	0.532733	-6.89465	FALSE	ns
1293	ST1293	ORF-T	YGR134W	CAF130	-0.5515	-4.04926	-3.02615	0.0203575	0.0613275	-4.00608	FALSE	ns
1294	ST1294	ORF-T	YGR135W	PRE9	-0.760617	-1.52525	-4.15332	0.00474567	0.0256391	-2.44247	TRUE	s
1295	ST1295	ORF-T	YGR136W, YGR137W	LSB1, YGR137W	-0.459071	-1.68095	-2.65862	0.0339907	0.0864871	-4.5438	FALSE	ns
1296	ST1296	ORF-T	YGR140W	CBF2	-0.450737	-4.32444	-2.65687	0.0340746	0.0866401	-4.54637	FALSE	ns
1297	ST1297	ORF-T	YGR141W	VPS62	-0.548098	-4.3043	-2.56383	0.0388865	0.0948298	-4.6833	FALSE	ns
1298	ST1298	ORF-T	YGR142W	BTN2	-0.967772	-3.32309	-2.85405	0.0258303	0.0717552	-4.25696	FALSE	ns
1299	ST1299	ORF-T	YGR143W	SKN1	-0.852994	-2.95509	-4.55237	0.00296614	0.0193799	-1.93105	TRUE	s
1300	ST1300	SUTs	SUT131	SUT131	-0.88562	-5.02867	-3.08362	0.0188173	0.0582049	-3.9228	FALSE	ns
1301	ST1301	ORF-T	YGR144W	THI4	0.600396	-5.52108	3.1902	0.0162818	0.0533099	-3.76915	FALSE	ns
1302	ST1302	ORF-T	YGR145W	ENP2	-0.73251	-3.12177	-4.16356	0.00468742	0.0254951	-2.42906	TRUE	s
1303	ST1303	SUTs	SUT132	SUT132	0.0747179	-6.33936	0.400301	0.701435	0.77662	-7.20631	FALSE	ns
1304	ST1304	CUTs	CUT156	CUT156	1.17115	-5.65823	4.6606	0.00262172	0.0181183	-1.79641	TRUE	s
1305	ST1305	ORF-T	YGR149W	YGR149W	-0.273856	-2.92085	-1.47392	0.186034	0.289377	-6.2213	FALSE	ns
1306	ST1306	other	YGRWdelta26	YGRWdelta26	0.589212	-5.6266	1.36658	0.216002	0.32407	-6.35509	FALSE	ns
1307	ST1307	CUTs	CUT157	CUT157	1.07161	-6.31723	3.21778	0.0156874	0.0519205	-3.72957	FALSE	ns
1308	ST1308	ORF-T	YGR153W	YGR153W	-0.476507	-6.02767	-2.43085	0.0470267	0.107846	-4.87897	FALSE	ns
1309	ST1309	ORF-T	YGR155W	CYS4	-0.962324	-0.168726	-5.21837	0.00142469	0.0133338	-1.12986	TRUE	s
1310	ST1310	ORF-T	YGR156W	PTI1	-1.94363	-5.05274	-10.4238	2.25539370090921e-05	0.00156973	3.3666	TRUE	s
1311	ST1311	ORF-T	YGR157W	CHO2	-0.812345	-0.871545	-4.81391	0.00220754	0.0169152	-1.60867	TRUE	s
1312	ST1312	CUTs	CUT158	CUT158	3.15075	-4.77522	17.2362	8.77530452652544e-07	0.000277452	6.65378	TRUE	s
1313	ST1313	SUTs	SUT133	SUT133	0.114358	-4.81771	0.329863	0.751612	0.816389	-7.23516	FALSE	ns
1314	ST1314	ORF-T	YGR161W-C	YGR161W-C	-0.14776	-3.13378	-0.668947	0.525979	0.629305	-7.04908	FALSE	ns
1315	ST1315	ORF-T	YGR162W	TIF4631	-0.711035	-1.48655	-3.46326	0.0113196	0.0423218	-3.38093	TRUE	s
1316	ST1316	other	YGR163W, YGR164W	GTR2, YGR164W	-0.530583	-3.68883	-2.95827	0.0223522	0.0647591	-4.10479	FALSE	ns
1317	ST1317	ORF-T	YGR165W	MRPS35	-0.3782	-3.56813	-2.15304	0.0701953	0.143026	-5.28511	FALSE	ns
1318	ST1318	ORF-T	YGR166W	KRE11	-0.440982	-3.49925	-2.54957	0.0396842	0.0961945	-4.70429	FALSE	ns
1319	ST1319	ORF-T	YGR167W	CLC1	-0.526443	-2.47193	-3.05823	0.0194818	0.0595508	-3.95956	FALSE	ns
1320	ST1320	ORF-T	YGR170W	PSD2	0.0762393	-3.92702	0.372928	0.720761	0.792466	-7.21815	FALSE	ns
1321	ST1321	ORF-T	YGR173W	RBG2	-0.312833	-2.89995	-1.25474	0.251718	0.363843	-6.48834	FALSE	ns
1322	ST1322	ORF-T	YGR174W-A	YGR174W-A	0.427476	-5.88267	1.20783	0.26816	0.381406	-6.54216	FALSE	ns
1323	ST1323	SUTs	SUT134	SUT134	0.353618	-6.20028	1.73621	0.128183	0.219536	-5.87461	FALSE	ns
1324	ST1324	SUTs	SUT135	SUT135	-0.111636	-6.35366	-0.609598	0.562294	0.661437	-7.08998	FALSE	ns
1325	ST1325	ORF-T	YGR181W	TIM13	-0.0761856	-1.65655	-0.324652	0.755381	0.819014	-7.23708	FALSE	ns
1326	ST1326	CUTs	CUT159	CUT159	0.469177	-6.16076	2.70112	0.0320094	0.0831032	-4.4813	FALSE	ns
1327	ST1327	SUTs	SUT136	SUT136	0.152486	-6.4304	0.601157	0.567579	0.665981	-7.09553	FALSE	ns
1328	ST1328	ORF-T	YGR186W	TFG1	-0.262028	-3.26031	-1.22528	0.26194	0.374966	-6.52229	FALSE	ns
1329	ST1329	other	YGRWdelta31	YGRWdelta31	0.00321434	-5.88676	0.00987601	0.992409	0.995339	-7.29687	FALSE	ns
1330	ST1330	ORF-T	YGR191W	HIP1	-1.09518	-1.35366	-6.49877	0.000408273	0.00680955	0.238146	TRUE	s
1331	ST1331	CUTs	CUT160	CUT160	0.562574	-4.67098	2.66523	0.0336741	0.0860181	-4.53407	FALSE	ns
1332	ST1332	ORF-T	YGR195W	SKI6	-0.97457	-3.01995	-5.33562	0.00126003	0.0124617	-0.995437	TRUE	s
1333	ST1333	ORF-T	YGR198W	YPP1	-0.219307	-2.20659	-1.15773	0.286715	0.40167	-6.59818	FALSE	ns
1334	ST1334	CUTs	CUT161	CUT161	1.41752	-5.37315	3.63378	0.00907065	0.0371197	-3.14301	TRUE	s
1335	ST1335	ORF-T	YGR199W	PMT6	-0.475628	-2.55126	-2.03329	0.0834847	0.161506	-5.4578	FALSE	ns
1336	ST1336	SUTs	SUT137	SUT137	1.02772	-5.86636	4.4485	0.0033445	0.0208199	-2.06189	TRUE	s
1337	ST1337	ORF-T	YGR203W	YGR203W	-0.18229	-3.60579	-0.741271	0.483784	0.592402	-6.99478	FALSE	ns
1338	ST1338	ORF-T	YGR204W	ADE3	-0.986938	-0.895033	-5.66343	0.000902251	0.0101881	-0.629771	TRUE	s
1339	ST1339	ORF-T	YGR205W	YGR205W	-0.226019	-3.97903	-1.1964	0.272299	0.385621	-6.55507	FALSE	ns
1340	ST1340	ORF-T	YGR206W	MVB12	-0.358648	-3.37705	-1.15686	0.287046	0.401964	-6.59914	FALSE	ns
1341	ST1341	ORF-T	YGR208W	SER2	-0.465109	-2.82884	-2.63298	0.0352476	0.0885085	-4.58152	FALSE	ns
1342	ST1342	ORF-T	YGR211W	ZPR1	-0.80179	-1.70394	-4.48632	0.00320087	0.0204541	-2.01406	TRUE	s
1343	ST1343	ORF-T	YGR212W	SLI1	-0.099814	-5.07072	-0.500265	0.632955	0.722129	-7.15633	FALSE	ns
1344	ST1344	CUTs	CUT162	CUT162	1.8796	-4.67846	4.64211	0.00267727	0.0183249	-1.81929	TRUE	s
1345	ST1345	ORF-T	YGR214W	RPS0A	-0.712118	0.779211	-3.95627	0.00603824	0.0294501	-2.70366	TRUE	s
1346	ST1346	ORF-T	YGR215W	RSM27	-0.264035	-3.52407	-1.48449	0.183297	0.285793	-6.20784	FALSE	ns
1347	ST1347	ORF-T	YGR217W	CCH1	-0.624547	-4.25787	-3.50499	0.0107179	0.0409327	-3.32235	TRUE	s
1348	ST1348	ORF-T	YGR218W	CRM1	-0.440206	-1.85502	-2.47487	0.0441525	0.103373	-4.81424	FALSE	ns
1349	ST1349	SUTs	SUT138	SUT138	0.987358	-4.57291	5.45489	0.00111408	0.0115079	-0.860674	TRUE	s
1350	ST1350	ORF-T	YGR222W	PET54	-0.02234	-3.58869	-0.12847	0.901561	0.931139	-7.28749	FALSE	ns
1351	ST1351	ORF-T	YGR225W	AMA1	0.20557	-6.53851	1.12399	0.299808	0.415594	-6.63502	FALSE	ns
1352	ST1352	ORF-T	YGR227W	DIE2	-0.828706	-1.56806	-4.80656	0.00222564	0.0169152	-1.61759	TRUE	s
1353	ST1353	ORF-T	YGR230W	BNS1	-0.636493	-4.67116	-1.58903	0.158153	0.256487	-6.07225	FALSE	ns
1354	ST1354	ORF-T	YGR232W	NAS6	-0.306811	-1.9737	-1.68818	0.137316	0.231174	-5.93989	FALSE	ns
1355	ST1355	ORF-T	YGR234W	YHB1	-1.49448	-0.521405	-7.06018	0.000249942	0.00521381	0.77416	TRUE	s
1356	ST1356	CUTs	CUT163	CUT163	0.121925	-6.36381	0.553266	0.598113	0.692261	-7.12565	FALSE	ns
1357	ST1357	SUTs	SUT139	SUT139	1.57719	-4.77943	8.51005	8.02770324428851e-05	0.00275365	2.00766	TRUE	s
1358	ST1358	SUTs	SUT140	SUT140	0.0593119	-4.96015	0.328101	0.752886	0.817284	-7.23581	FALSE	ns
1359	ST1359	SUTs	SUT141	SUT141	0.338049	-4.64524	1.95392	0.0936485	0.174753	-5.57101	FALSE	ns
1360	ST1360	CUTs	CUT164	CUT164	1.45389	-5.51052	8.41553	8.60048227933645e-05	0.00285583	1.9332	TRUE	s
1361	ST1361	ORF-T	YGR243W	FMP43	-0.859433	-3.64852	-1.57319	0.161744	0.260684	-6.09307	FALSE	ns
1362	ST1362	ORF-T	YGR247W	CPD1	-0.717309	-4.2255	-3.75035	0.00781569	0.0342177	-2.98254	TRUE	s
1363	ST1363	ORF-T	YGR248W	SOL4	-0.652803	-5.72516	-3.02176	0.0204805	0.0614462	-4.01245	FALSE	ns
1364	ST1364	ORF-T	YGR249W	MGA1	-1.77954	-3.57735	-5.31356	0.0012893	0.0126114	-1.02058	TRUE	s
1365	ST1365	SUTs	SUT142	SUT142	0.535699	-4.35823	2.96559	0.0221273	0.0643123	-4.09412	FALSE	ns
1366	ST1366	CUTs	CUT165	CUT165	0.25688	-6.43749	1.45348	0.191433	0.295636	-6.24719	FALSE	ns
1367	ST1367	ORF-T	YGR251W	YGR251W	0.0115083	-4.05916	0.0532518	0.95909	0.972598	-7.2953	FALSE	ns
1368	ST1368	ORF-T	YGR252W	GCN5	-0.591583	-4.19902	-3.37432	0.0127274	0.0454811	-3.50646	TRUE	s
1369	ST1369	CUTs	CUT166	CUT166	2.63629	-4.79126	12.7155	6.33453774828398e-06	0.000800241	4.69258	TRUE	s
1370	ST1370	ORF-T	YGR254W	ENO1	-1.09798	0.37262	-5.85141	0.000749494	0.00920662	-0.426657	TRUE	s
1371	ST1371	other	tT(UGU)G2, YGR256W	tT(UGU)G2, GND2	-0.00966754	-6.01584	-0.0567536	0.956403	0.970821	-7.29508	FALSE	ns
1372	ST1372	SUTs	SUT143	SUT143	-1.35091	-2.73391	-4.80062	0.00224037	0.0169152	-1.6248	TRUE	s
1373	ST1373	ORF-T	YGR260W	TNA1	-0.434963	-0.816949	-2.54872	0.0397324	0.0962471	-4.70554	FALSE	ns
1374	ST1374	CUTs	CUT167	CUT167	0.880848	-5.57789	3.24686	0.0150858	0.0506247	-3.68793	FALSE	ns
1375	ST1375	ORF-T	YGR266W	YGR266W	-0.434197	-3.64866	-2.4561	0.0453551	0.105173	-4.84184	FALSE	ns
1376	ST1376	other	YGR269W, YGR270W	YGR269W, YTA7	-0.0980759	-3.30823	-0.557507	0.595372	0.689967	-7.12308	FALSE	ns
1377	ST1377	ORF-T	YGR271W	SLH1	-0.467288	-3.96906	-2.67764	0.0330885	0.0849555	-4.51582	FALSE	ns
1378	ST1378	CUTs	CUT168	CUT168	0.615183	-6.07966	2.47626	0.0440646	0.103334	-4.81219	FALSE	ns
1379	ST1379	ORF-T	YGR275W	RTT102	0.0334341	-3.07912	0.170717	0.869505	0.909005	-7.28028	FALSE	ns
1380	ST1380	ORF-T	YGR278W	CWC22	-0.409538	-4.82958	-1.94364	0.0950511	0.176826	-5.58558	FALSE	ns
1381	ST1381	SUTs	SUT144	SUT144	-0.395857	-6.21854	-2.01533	0.0856847	0.164481	-5.48352	FALSE	ns
1382	ST1382	ORF-T	YGR281W	YOR1	-0.937604	-2.722	-4.98723	0.00182479	0.0152958	-1.40058	TRUE	s
1383	ST1383	SUTs	SUT145	SUT145	1.68767	-4.86848	8.69608	7.02261799728796e-05	0.0025812	2.15202	TRUE	s
1384	ST1384	SUTs	SUT146	SUT146	0.977605	-5.66024	4.03223	0.00549901	0.0277508	-2.60232	TRUE	s
1385	ST1385	CUTs	CUT169	CUT169	-0.188554	-6.1257	-0.746839	0.480632	0.589801	-6.9904	FALSE	ns
1386	ST1386	CUTs	CUT170	CUT170	-0.143597	-6.44818	-0.610633	0.561647	0.660997	-7.0893	FALSE	ns
1387	ST1387	ORF-T	YGR288W	MAL13	0.00273539	-4.34795	0.0121576	0.990655	0.994073	-7.29684	FALSE	ns
1388	ST1388	SUTs	SUT147	SUT147	1.44014	-5.30137	5.44568	0.00112464	0.0115841	-0.871008	TRUE	s
1389	ST1389	ORF-T	YHL044W	YHL044W	0.274922	-4.68131	1.54768	0.167691	0.267892	-6.1264	FALSE	ns
1390	ST1390	ORF-T	YHL042W	YHL042W	0.265303	-5.01089	0.833938	0.43314	0.545797	-6.91839	FALSE	ns
1391	ST1391	ORF-T	YHL039W	YHL039W	-0.501587	-2.18312	-2.6035	0.0367535	0.0911878	-4.62491	FALSE	ns
1392	ST1392	ORF-T	YHL036W	MUP3	-0.654627	-4.20051	-2.53067	0.0407687	0.0979419	-4.73212	FALSE	ns
1393	ST1393	other	YHL030W-A	YHL030W-A	0.127725	-6.23856	0.629103	0.550194	0.650466	-7.07691	FALSE	ns
1394	ST1394	ORF-T	YHL030W	ECM29	-0.317526	-2.56271	-1.49332	0.181038	0.283609	-6.19656	FALSE	ns
1395	ST1395	ORF-T	YHL028W	WSC4	-2.02204	-4.43495	-5.97993	0.000661829	0.00864133	-0.290464	TRUE	s
1396	ST1396	ORF-T	YHL027W	RIM101	-0.523534	-2.71839	-2.52554	0.0410678	0.0984108	-4.73966	FALSE	ns
1397	ST1397	ORF-T	YHL025W	SNF6	-0.169306	-3.7739	-0.749895	0.478908	0.588379	-6.98799	FALSE	ns
1398	ST1398	ORF-T	YHL024W	RIM4	0.278821	-6.19367	1.62303	0.150694	0.247034	-6.02725	FALSE	ns
1399	ST1399	SUTs	SUT148	SUT148	-0.533315	-5.96965	-1.98668	0.0893124	0.168994	-5.52441	FALSE	ns
1400	ST1400	ORF-T	YHL018W, YHL017W	YHL018W, YHL017W	-0.530921	-2.46233	-2.48061	0.0437915	0.102959	-4.8058	FALSE	ns
1401	ST1401	CUTs	CUT171	CUT171	0.268848	-6.37188	1.58992	0.157954	0.256336	-6.07108	FALSE	ns
1402	ST1402	ORF-T	YHL015W	RPS20	-0.0260417	1.56544	-0.1532	0.882768	0.918645	-7.28352	FALSE	ns
1403	ST1403	SUTs	SUT149	SUT149	0.45018	-4.33732	2.45537	0.0454027	0.105199	-4.84292	FALSE	ns
1404	ST1404	CUTs	CUT172	CUT172	1.03732	-4.5427	4.87491	0.00206346	0.0163281	-1.53494	TRUE	s
1405	ST1405	ORF-T	YHL012W	YHL012W	-0.0282175	-6.60637	-0.148182	0.886575	0.920893	-7.28438	FALSE	ns
1406	ST1406	SUTs	SUT150	SUT150	-0.0979812	-5.68901	-0.28242	0.786177	0.844846	-7.25155	FALSE	ns
1407	ST1407	SUTs	SUT151	SUT151	0.378405	-4.25947	2.19345	0.0662098	0.137	-5.22644	FALSE	ns
1408	ST1408	ORF-T	YHL004W	MRP4	-0.475474	-2.56767	-2.44763	0.0459088	0.105984	-4.8543	FALSE	ns
1409	ST1409	ORF-T	YHL002W	HSE1	-0.268618	-3.19315	-1.3807	0.211825	0.319451	-6.33779	FALSE	ns
1410	ST1410	ORF-T	YHL001W	RPL14B	0.4058	-3.60921	2.02139	0.0849356	0.1634	-5.47484	FALSE	ns
1411	ST1411	ORF-T	YHR001W	OSH7	-0.396872	-3.72213	-2.12713	0.0728777	0.146562	-5.32264	FALSE	ns
1412	ST1412	ORF-T	YHR001W-A	QCR10	-1.02685	-2.17092	-3.7713	0.00761096	0.0337687	-2.9539	TRUE	s
1413	ST1413	ORF-T	YHR002W	LEU5	-0.363752	-4.39622	-2.14311	0.0712121	0.144484	-5.29951	FALSE	ns
1414	ST1414	SUTs	SUT152	SUT152	0.283226	-5.54852	0.883689	0.407562	0.522531	-6.87438	FALSE	ns
1415	ST1415	CUTs	CUT173	CUT173	1.72706	-3.93453	9.98759	2.9547899795156e-05	0.00169191	3.07981	TRUE	s
1416	ST1416	ORF-T	YHR006W	STP2	-0.205209	-3.73483	-1.20912	0.267695	0.38088	-6.5407	FALSE	ns
1417	ST1417	SUTs	SUT153	SUT153	1.091	-5.84867	4.34749	0.00376445	0.0224275	-2.19068	TRUE	s
1418	ST1418	ORF-T	YHR010W	RPL27A	1.39888	-3.94128	7.83376	0.00013343	0.00376086	1.45738	TRUE	s
1419	ST1419	ORF-T	YHR011W	DIA4	0.0424802	-6.11625	0.224271	0.829255	0.87914	-7.26825	FALSE	ns
1420	ST1420	ORF-T	YHR012W	VPS29	-0.630849	-3.22837	-3.05705	0.0195134	0.0596224	-3.96127	FALSE	ns
1421	ST1421	ORF-T	YHR015W	MIP6	0.0748811	-6.05772	0.387906	0.710158	0.783414	-7.21177	FALSE	ns
1422	ST1422	ORF-T	YHR017W	YSC83	-1.04438	-3.19655	-5.22382	0.00141652	0.0132744	-1.12356	TRUE	s
1423	ST1423	ORF-T	YHR020W	YHR020W	-0.704762	-0.500864	-3.76883	0.00763479	0.0337919	-2.95727	TRUE	s
1424	ST1424	other	YHRWtau3	YHRWtau3	-0.0633707	-4.76456	-0.344357	0.74117	0.807459	-7.22966	FALSE	ns
1425	ST1425	ORF-T	YHR021W-A	ECM12	-1.75722	-5.62995	-9.32526	4.54623347291438e-05	0.00215801	2.61954	TRUE	s
1426	ST1426	SUTs	SUT154	SUT154	-0.11592	-5.92029	-0.309816	0.766148	0.828096	-7.24239	FALSE	ns
1427	ST1427	ORF-T	YHR023W	MYO1	-0.269367	-3.64163	-1.34438	0.222715	0.331136	-6.38207	FALSE	ns
1428	ST1428	ORF-T	YHR025W	THR1	-0.364569	0.346936	-1.94624	0.0946949	0.176298	-5.5819	FALSE	ns
1429	ST1429	ORF-T	YHR026W	PPA1	-0.334038	-0.0992901	-1.73312	0.128753	0.220033	-5.87883	FALSE	ns
1430	ST1430	SUTs	SUT155	SUT155	0.0668223	-4.37309	0.282727	0.785951	0.844729	-7.25145	FALSE	ns
1431	ST1431	other	YHR028W-A	YHR028W-A	0.774983	-4.57954	3.24935	0.0150354	0.0505256	-3.68436	FALSE	ns
1432	ST1432	CUTs	CUT174	CUT174	1.62848	-5.2737	8.1041	0.000108442	0.00327217	1.68231	TRUE	s
1433	ST1433	CUTs	CUT175	CUT175	1.70313	-3.53641	9.13458	5.17233127440129e-05	0.00229567	2.48111	TRUE	s
1434	ST1434	CUTs	CUT176	CUT176	1.34442	-4.9485	7.56035	0.000165573	0.00430016	1.22281	TRUE	s
1435	ST1435	other	YHR032W, YHR032W-A	YHR032W, YHR032W-A	-1.15344	-3.49329	-6.143	0.000566762	0.00794642	-0.120713	TRUE	s
1436	ST1436	ORF-T	YHR033W	YHR033W	0.539195	-3.42877	2.9943	0.0212686	0.0628466	-4.05235	FALSE	ns
1437	ST1437	ORF-T	YHR035W	YHR035W	-0.578138	-5.99315	-3.34845	0.0131717	0.0464749	-3.54314	TRUE	s
1438	ST1438	ORF-T	YHR036W	BRL1	0.250731	-4.71267	0.903823	0.397533	0.51448	-6.85599	FALSE	ns
1439	ST1439	ORF-T	YHR037W	PUT2	-0.298894	-2.68567	-1.5484	0.167518	0.267735	-6.12546	FALSE	ns
1440	ST1440	ORF-T	YHR038W	RRF1	-0.115836	-4.46626	-0.56922	0.587838	0.683214	-7.11587	FALSE	ns
1441	ST1441	ORF-T	YHR040W	BCD1	0.0401765	-4.60303	0.22506	0.828667	0.878947	-7.26805	FALSE	ns
1442	ST1442	SUTs	SUT156	SUT156	0.313361	-5.33187	1.60768	0.154019	0.25124	-6.04761	FALSE	ns
1443	ST1443	ORF-T	YHR042W	NCP1	-0.451032	-0.0180266	-2.65645	0.0340953	0.0866624	-4.547	FALSE	ns
1444	ST1444	CUTs	CUT177	CUT177	-0.567672	-5.8539	-3.12369	0.0178176	0.0563449	-3.86491	FALSE	ns
1445	ST1445	ORF-T	YHR045W	YHR045W	-0.414968	-2.9558	-2.24188	0.0617334	0.130147	-5.15588	FALSE	ns
1446	ST1446	CUTs	CUT178	CUT178	0.242084	-6.40469	1.36564	0.216281	0.324354	-6.35623	FALSE	ns
1447	ST1447	SUTs	SUT157	SUT157	0.879631	-5.95563	4.09183	0.00511292	0.0267126	-2.52337	TRUE	s
1448	ST1448	ORF-T	YHR048W	YHR048W	-1.62242	-4.75502	-7.15091	0.000231557	0.00504157	0.857492	TRUE	s
1449	ST1449	ORF-T	YHR049W	FSH1	-0.693948	-1.60897	-4.02774	0.00552933	0.027821	-2.60828	TRUE	s
1450	ST1450	ORF-T	YHR050W	SMF2	-0.507477	-1.95525	-2.92369	0.0234472	0.0669185	-4.15519	FALSE	ns
1451	ST1451	other	YHR050W-A, YHR051W	YHR050W-A, COX6	-1.07635	-1.89332	-6.35556	0.000465126	0.00731688	0.0955504	TRUE	s
1452	ST1452	ORF-T	YHR052W	CIC1	-0.322573	-1.76614	-1.65918	0.143125	0.23836	-5.97894	FALSE	ns
1453	ST1453	CUTs	CUT179	CUT179	1.23827	-5.59913	4.55377	0.00296138	0.0193799	-1.9293	TRUE	s
1454	ST1454	ORF-T	YHR059W	FYV4	0.531872	-3.76436	2.78266	0.0285411	0.0768991	-4.36155	FALSE	ns
1455	ST1455	ORF-T	YHR060W	VMA22	-0.344435	-3.40108	-1.67693	0.139542	0.234083	-5.95507	FALSE	ns
1456	ST1456	SUTs	SUT158	SUT158	0.711997	-6.10021	2.33491	0.0539806	0.118415	-5.01982	FALSE	ns
1457	ST1457	SUTs	SUT159	SUT159	1.21236	-5.05485	5.76117	0.000818859	0.0096821	-0.523578	TRUE	s
1458	ST1458	ORF-T	YHR066W	SSF1	-0.713817	-2.87808	-3.42492	0.0119045	0.0437917	-3.43492	TRUE	s
1459	ST1459	ORF-T	YHR067W	HTD2	-0.547634	-4.37513	-2.96692	0.0220867	0.0642751	-4.09218	FALSE	ns
1460	ST1460	ORF-T	YHR068W	DYS1	-0.712937	-0.334791	-3.95784	0.00602658	0.0294129	-2.70157	TRUE	s
1461	ST1461	ORF-T	YHR070W	TRM5	-1.06275	-2.99349	-5.26959	0.00134995	0.0129	-1.07089	TRUE	s
1462	ST1462	ORF-T	YHR071W	PCL5	-0.0610242	-1.60993	-0.35166	0.735931	0.803195	-7.2268	FALSE	ns
1463	ST1463	ORF-T	YHR072W	ERG7	-0.576804	-2.66457	-2.57072	0.0385068	0.094315	-4.67316	FALSE	ns
1464	ST1464	ORF-T	YHR072W-A	NOP10	-0.523787	-0.00370032	-2.90949	0.0239134	0.0677966	-4.17591	FALSE	ns
1465	ST1465	ORF-T	YHR073W, YHR073W-A	OSH3, YHR073W-A	-0.34029	-2.95015	-1.59676	0.156427	0.254596	-6.06205	FALSE	ns
1466	ST1466	ORF-T	YHR074W	QNS1	-0.470359	-1.6502	-2.63067	0.0353631	0.0887678	-4.58492	FALSE	ns
1467	ST1467	ORF-T	YHR076W	PTC7	-3.1157	-5.07091	-17.8661	6.93686121099589e-07	0.000277452	6.87605	TRUE	s
1468	ST1468	ORF-T	YHR078W	YHR078W	-0.748098	-2.39469	-3.45745	0.0114061	0.0425579	-3.3891	TRUE	s
1469	ST1469	SUTs	SUT160	SUT160	0.0434253	-6.53162	0.236111	0.820426	0.871803	-7.26515	FALSE	ns
1470	ST1470	ORF-T	YHR081W	LRP1	-0.139851	-3.06416	-0.788587	0.45744	0.568828	-6.95671	FALSE	ns
1471	ST1471	SUTs	SUT161	SUT161	0.249924	-6.42184	1.44736	0.193076	0.297216	-6.25489	FALSE	ns
1472	ST1472	ORF-T	YHR083W	SAM35	-1.19395	-2.84049	-6.66062	0.000353259	0.00626855	0.396371	TRUE	s
1473	ST1473	ORF-T	YHR084W	STE12	-0.245078	-2.51469	-1.28876	0.240344	0.351243	-6.44852	FALSE	ns
1474	ST1474	ORF-T	YHR085W	IPI1	-0.281653	-4.15521	-1.4945	0.180737	0.28332	-6.19504	FALSE	ns
1475	ST1475	ORF-T	YHR086W	NAM8	-0.482029	-2.27373	-2.47814	0.0439463	0.103136	-4.80942	FALSE	ns
1476	ST1476	ORF-T	YHR087W	YHR087W	-0.090266	-4.01818	-0.489232	0.640341	0.728384	-7.16235	FALSE	ns
1477	ST1477	ORF-T	YHR088W	RPF1	-0.128723	-3.17635	-0.69375	0.51125	0.617068	-7.031	FALSE	ns
1478	ST1478	SUTs	SUT162	SUT162	-0.169666	-5.89187	-0.858535	0.420354	0.533754	-6.89689	FALSE	ns
1479	ST1479	SUTs	SUT163	SUT163	0.00608346	-6.5822	0.0338011	0.974024	0.983323	-7.29627	FALSE	ns
1480	ST1480	SUTs	SUT164	SUT164	1.0808	-4.11739	5.68685	0.000881433	0.0100467	-0.604209	TRUE	s
1481	ST1481	ORF-T	YHR099W	TRA1	-0.836094	-2.33478	-4.64094	0.00268081	0.0183249	-1.82073	TRUE	s
1482	ST1482	SUTs	SUT165	SUT165	0.168348	-4.98113	0.549558	0.600515	0.694599	-7.12789	FALSE	ns
1483	ST1483	ORF-T	YHR102W	KIC1	-0.155344	-3.74291	-0.835201	0.432477	0.545444	-6.9173	FALSE	ns
1484	ST1484	ORF-T	YHR103W	SBE22	-0.903998	-3.33365	-5.06013	0.00168644	0.0146521	-1.31437	TRUE	s
1485	ST1485	ORF-T	YHR104W	GRE3	-0.664126	-2.52575	-3.48584	0.0109896	0.0415796	-3.3492	TRUE	s
1486	ST1486	ORF-T	YHR105W, YHR106W	YPT35, TRR2	0.243637	-4.08691	1.44498	0.193719	0.297891	-6.25789	FALSE	ns
1487	ST1487	ORF-T	YHR108W	GGA2	-0.88389	-1.3251	-4.47411	0.00324649	0.0205504	-2.02948	TRUE	s
1488	ST1488	ORF-T	YHR109W	CTM1	-1.05822	-4.48521	-6.20528	0.0005346	0.00779245	-0.0567732	TRUE	s
1489	ST1489	ORF-T	YHR110W	ERP5	-0.848623	-3.00067	-4.32432	0.00386881	0.0228175	-2.22043	TRUE	s
1490	ST1490	ORF-T	YHR111W	UBA4	-0.799237	-3.39576	-4.6884	0.00254061	0.0178161	-1.76211	TRUE	s
1491	ST1491	SUTs	SUT166	SUT166	-0.0394507	-4.63259	-0.220441	0.832117	0.881194	-7.26922	FALSE	ns
1492	ST1492	ORF-T	YHR113W	YHR113W	-0.32658	-2.5871	-1.7751	0.121219	0.210657	-5.82125	FALSE	ns
1493	ST1493	ORF-T	YHR114W	BZZ1	-0.114861	-3.73358	-0.600527	0.567974	0.666179	-7.09594	FALSE	ns
1494	ST1494	ORF-T	YHR116W, YHR117W	COX23, TOM71	-0.912354	-3.52754	-4.98761	0.00182403	0.0152958	-1.40013	TRUE	s
1495	ST1495	ORF-T	YHR119W	SET1	-0.304073	-3.78037	-1.49424	0.180804	0.283364	-6.19538	FALSE	ns
1496	ST1496	ORF-T	YHR120W	MSH1	0.122684	-5.1383	0.585975	0.577158	0.674232	-7.10532	FALSE	ns
1497	ST1497	ORF-T	YHR121W	LSM12	-0.316037	-2.97075	-1.25091	0.253028	0.365296	-6.49279	FALSE	ns
1498	ST1498	ORF-T	YHR122W	YHR122W	-0.438495	-2.99012	-2.55895	0.0391577	0.0952765	-4.69049	FALSE	ns
1499	ST1499	ORF-T	YHR123W	EPT1	-0.689726	-2.10452	-3.83866	0.00699153	0.0322809	-2.86222	TRUE	s
1500	ST1500	ORF-T	YHR124W	NDT80	-0.019399	-6.29384	-0.106048	0.91866	0.942774	-7.2905	FALSE	ns
1501	ST1501	ORF-T	YHR127W	YHR127W	-0.36779	-3.73645	-1.88576	0.103347	0.186997	-5.66727	FALSE	ns
1502	ST1502	ORF-T	YHR128W	FUR1	-1.15352	-0.390678	-6.70014	0.000341134	0.00612526	0.434538	TRUE	s
1503	ST1503	SUTs	SUT167	SUT167	1.09471	-5.1681	3.62723	0.00914739	0.0373287	-3.15207	TRUE	s
1504	ST1504	ORF-T	YHR132W-A	IGO2	-0.801733	-3.18735	-3.27056	0.0146138	0.0495438	-3.65405	TRUE	s
1505	ST1505	ORF-T	YHR134W	WSS1	-0.618981	-4.69349	-3.00885	0.0208472	0.0620807	-4.03121	FALSE	ns
1506	ST1506	SUTs	SUT168	SUT168	-0.0222663	-5.83111	-0.0786979	0.93958	0.958113	-7.29338	FALSE	ns
1507	ST1507	ORF-T	YHR137W	ARO9	-0.245335	-2.5381	-1.39035	0.209015	0.316328	-6.32593	FALSE	ns
1508	ST1508	SUTs	SUT169	SUT169	0.595226	-5.59056	2.47957	0.0438563	0.103011	-4.80732	FALSE	ns
1509	ST1509	ORF-T	YHR140W	YHR140W	-0.987697	-5.37037	-4.32297	0.00387498	0.0228354	-2.22216	TRUE	s
1510	ST1510	other	snR32	SNR32	0.892237	0.00293421	3.36904	0.0128167	0.0457102	-3.51393	TRUE	s
1511	ST1511	ORF-T	YHR142W	CHS7	-0.439055	-1.97613	-2.22997	0.0628046	0.131828	-5.17325	FALSE	ns
1512	ST1512	ORF-T	YHR143W	DSE2	-1.04773	0.428919	-5.66759	0.000898516	0.0101618	-0.625229	TRUE	s
1513	ST1513	ORF-T	YHR143W-A	RPC10	-0.0777943	-1.09931	-0.383543	0.713239	0.785621	-7.21365	FALSE	ns
1514	ST1514	ORF-T	YHR146W	CRP1	0.0240745	-2.56209	0.135385	0.896299	0.927946	-7.28645	FALSE	ns
1515	ST1515	SUTs	SUT170	SUT170	-0.956109	-5.80896	-3.43197	0.0117946	0.043516	-3.42498	TRUE	s
1516	ST1516	ORF-T	YHR148W	IMP3	-0.0988707	-2.72438	-0.582111	0.579611	0.676337	-7.10778	FALSE	ns
1517	ST1517	ORF-T	YHR150W	PEX28	-0.352399	-4.77026	-2.07995	0.0780297	0.153651	-5.39075	FALSE	ns
1518	ST1518	ORF-T	YHR152W	SPO12	0.00375421	-2.92615	0.0154829	0.988099	0.992695	-7.29679	FALSE	ns
1519	ST1519	ORF-T	YHR154W	RTT107	-0.640446	-3.75088	-3.04315	0.0198884	0.0604129	-3.98142	FALSE	ns
1520	ST1520	ORF-T	YHR155W	YSP1	-0.0785503	-3.517	-0.384496	0.712566	0.784999	-7.21324	FALSE	ns
1521	ST1521	other	snR71	SNR71	2.67339	-1.0579	14.7019	2.47620346505861e-06	0.000466137	5.64317	TRUE	s
1522	ST1522	CUTs	CUT180	CUT180	2.1284	-2.03865	11.2178	1.41445316792402e-05	0.00122451	3.8584	TRUE	s
1523	ST1523	CUTs	CUT181	CUT181	2.07493	-2.81505	8.39613	8.72372694370422e-05	0.00287054	1.91782	TRUE	s
1524	ST1524	ORF-T	YHR157W	REC104	1.13289	-4.88309	6.02886	0.000631537	0.00844216	-0.239172	TRUE	s
1525	ST1525	ORF-T	YHR159W	YHR159W	-0.4607	-5.24338	-1.82651	0.112571	0.19942	-5.7501	FALSE	ns
1526	ST1526	ORF-T	YHR162W	YHR162W	-0.410292	-0.0853202	-2.31828	0.0552901	0.120524	-5.0442	FALSE	ns
1527	ST1527	ORF-T	YHR163W	SOL3	-0.43246	-1.10367	-2.07386	0.0787217	0.154511	-5.39953	FALSE	ns
1528	ST1528	SUTs	SUT171	SUT171	0.823916	-5.04241	3.61802	0.00925655	0.0376247	-3.16484	TRUE	s
1529	ST1529	ORF-T	YHR167W	THP2	-0.622672	-4.44302	-3.54034	0.0102356	0.0401143	-3.27292	TRUE	s
1530	ST1530	ORF-T	YHR168W	MTG2	-0.80897	-5.34784	-4.3023	0.00397094	0.0231569	-2.24878	TRUE	s
1531	ST1531	ORF-T	YHR169W	DBP8	-0.577568	-3.47668	-3.1755	0.0166087	0.0539912	-3.79029	FALSE	ns
1532	ST1532	ORF-T	YHR170W	NMD3	-0.619157	-1.74289	-3.32727	0.013548	0.0471167	-3.57323	TRUE	s
1533	ST1533	ORF-T	YHR171W	ATG7	-0.611385	-4.92235	-3.26708	0.014682	0.0497288	-3.65901	TRUE	s
1534	ST1534	ORF-T	YHR172W	SPC97	0.0640907	-4.35839	0.35792	0.731452	0.799868	-7.22431	FALSE	ns
1535	ST1535	ORF-T	YHR174W	ENO2	0.00897905	1.96247	0.0399298	0.969317	0.979418	-7.29601	FALSE	ns
1536	ST1536	other	YHR175W, YHR175W-A	CTR2, YHR175W-A	0.483017	-0.718145	2.55922	0.0391425	0.0952765	-4.69009	FALSE	ns
1537	ST1537	ORF-T	YHR176W	FMO1	-0.0287989	-5.95909	-0.136144	0.895722	0.927744	-7.28633	FALSE	ns
1538	ST1538	ORF-T	YHR177W	YHR177W	-0.419063	-5.96511	-2.02879	0.0840304	0.162155	-5.46425	FALSE	ns
1539	ST1539	ORF-T	YHR178W	STB5	-0.7415	-5.20384	-2.53912	0.04028	0.0972175	-4.71968	FALSE	ns
1540	ST1540	CUTs	CUT182	CUT182	1.46467	-5.33108	5.19669	0.0014577	0.0135729	-1.15492	TRUE	s
1541	ST1541	ORF-T	YHR179W	OYE2	-0.557625	0.1328	-2.91099	0.0238638	0.0677353	-4.17373	FALSE	ns
1542	ST1542	other	YHR180W	YHR180W	-0.008781	-4.77087	-0.0444499	0.965846	0.977265	-7.2958	FALSE	ns
1543	ST1543	ORF-T	YHR181W	SVP26	-0.423941	-0.814534	-2.18054	0.0674574	0.138495	-5.2452	FALSE	ns
1544	ST1544	ORF-T	YHR182W	YHR182W	-0.416819	-5.18815	-1.69515	0.135952	0.22949	-5.93045	FALSE	ns
1545	ST1545	ORF-T	YHR183W	GND1	-0.444164	0.270325	-2.59905	0.0369862	0.0915776	-4.63145	FALSE	ns
1546	ST1546	ORF-T	YHR184W	SSP1	0.543627	-5.8504	1.82139	0.113404	0.200359	-5.75721	FALSE	ns
1547	ST1547	ORF-T	YHR187W	IKI1	-0.15949	-3.30233	-0.89516	0.401826	0.517734	-6.86394	FALSE	ns
1548	ST1548	ORF-T	YHR189W	PTH1	-0.323191	-4.29628	-1.91547	0.0990036	0.181761	-5.62543	FALSE	ns
1549	ST1549	ORF-T	YHR190W	ERG9	-0.35266	-0.895075	-2.0596	0.0803634	0.156949	-5.42003	FALSE	ns
1550	ST1550	ORF-T	YHR192W	YHR192W	-0.482961	-3.90627	-2.57753	0.0381354	0.0936578	-4.66313	FALSE	ns
1551	ST1551	ORF-T	YHR194W	MDM31	-0.244959	-4.07905	-1.40272	0.20546	0.311992	-6.31065	FALSE	ns
1552	ST1552	ORF-T	YHR195W	NVJ1	-0.402743	-4.22946	-2.00217	0.0873316	0.166264	-5.50231	FALSE	ns
1553	ST1553	ORF-T	YHR196W	UTP9	-0.642006	-2.61903	-3.41851	0.0120055	0.043976	-3.44396	TRUE	s
1554	ST1554	ORF-T	YHR197W	RIX1	-0.786891	-3.01847	-4.56817	0.00291284	0.0191521	-1.91128	TRUE	s
1555	ST1555	SUTs	SUT172	SUT172	0.921206	-5.98894	2.18183	0.0673321	0.138316	-5.24333	FALSE	ns
1556	ST1556	ORF-T	YHR200W	RPN10	-0.208047	-2.20019	-1.1097	0.305498	0.421873	-6.65039	FALSE	ns
1557	ST1557	CUTs	CUT183	CUT183	-0.0492438	-6.18159	-0.244784	0.813977	0.866907	-7.26279	FALSE	ns
1558	ST1558	CUTs	CUT184	CUT184	0.175488	-6.39226	0.829163	0.435655	0.548016	-6.92251	FALSE	ns
1559	ST1559	ORF-T	YHR202W	YHR202W	-1.48633	-5.41376	-6.52272	0.000399553	0.00674141	0.261756	TRUE	s
1560	ST1560	ORF-T	YHR204W	MNL1	-0.353707	-2.30832	-1.71718	0.13173	0.22408	-5.90056	FALSE	ns
1561	ST1561	ORF-T	YHR205W	SCH9	-0.300568	-1.60964	-1.67835	0.139259	0.233716	-5.95316	FALSE	ns
1562	ST1562	ORF-T	YHR206W	SKN7	-0.511397	-2.08012	-2.07843	0.0782022	0.153782	-5.39294	FALSE	ns
1563	ST1563	SUTs	SUT173	SUT173	0.516294	-3.98789	2.37893	0.0506676	0.113475	-4.95526	FALSE	ns
1564	ST1564	ORF-T	YHR208W	BAT1	-0.322294	-0.0956514	-1.79905	0.117114	0.205564	-5.7882	FALSE	ns
1565	ST1565	ORF-T	YHR209W	CRG1	0.112085	-4.92163	0.637075	0.545296	0.645883	-7.07146	FALSE	ns
1566	ST1566	SUTs	SUT174	SUT174	-0.143185	-4.54495	-0.452956	0.664934	0.748398	-7.18128	FALSE	ns
1567	ST1567	ORF-T	YHR211W	FLO5	-0.142625	-3.61529	-0.733396	0.488267	0.595451	-7.00092	FALSE	ns
1568	ST1568	other	YIL168W, YIL167W	YIL168W, SDL1	0.0323595	-5.88606	0.170753	0.869478	0.909005	-7.28028	FALSE	ns
1569	ST1569	SUTs	SUT175	SUT175	0.221252	-5.67016	0.686083	0.515774	0.620673	-7.03665	FALSE	ns
1570	ST1570	CUTs	CUT185	CUT185	0.916546	-5.99741	3.17151	0.0166986	0.0541553	-3.79602	FALSE	ns
1571	ST1571	SUTs	SUT176	SUT176	-0.161126	-5.21147	-0.93767	0.38109	0.498432	-6.82436	FALSE	ns
1572	ST1572	ORF-T	YIL162W	SUC2	-0.487347	-1.42469	-2.52944	0.0408404	0.0980169	-4.73393	FALSE	ns
1573	ST1573	ORF-T	YIL161W	YIL161W	0.621558	-4.49796	2.71589	0.0313497	0.0819583	-4.45959	FALSE	ns
1574	ST1574	SUTs	SUT177	SUT177	-0.701442	-5.57177	-3.67511	0.0086021	0.0359546	-3.0859	TRUE	s
1575	ST1575	ORF-T	YIL159W	BNR1	-0.525293	-4.86819	-2.55399	0.0394351	0.0958143	-4.69778	FALSE	ns
1576	ST1576	ORF-T	YIL158W	YIL158W	-0.653569	-3.45778	-2.4099	0.0484618	0.109923	-4.90976	FALSE	ns
1577	ST1577	other	YIL156W-A, YIL156W-B	YIL156W-A, YIL156W-B	-0.0065437	-1.93236	-0.0369353	0.971617	0.98106	-7.29615	FALSE	ns
1578	ST1578	ORF-T	YIL156W	UBP7	-0.656881	-3.67654	-3.52758	0.010407	0.0404516	-3.29075	TRUE	s
1579	ST1579	ORF-T	YIL153W	RRD1	-0.695579	-3.54895	-3.82966	0.00707098	0.0323936	-2.87443	TRUE	s
1580	ST1580	ORF-T	YIL152W	YIL152W	-0.430717	-4.40294	-2.02703	0.0842449	0.162329	-5.46677	FALSE	ns
1581	ST1581	ORF-T	YIL148W	RPL40A	-0.0419672	-4.46775	-0.114642	0.912101	0.938161	-7.28941	FALSE	ns
1582	ST1582	SUTs	SUT178	SUT178	0.0242917	-5.98201	0.11409	0.912522	0.938461	-7.28948	FALSE	ns
1583	ST1583	ORF-T	YIL144W	TID3	-0.119545	-4.50527	-0.627929	0.550918	0.65111	-7.07771	FALSE	ns
1584	ST1584	ORF-T	YIL142W	CCT2	-0.637796	-1.4185	-3.6694	0.00866529	0.0361526	-3.09378	TRUE	s
1585	ST1585	ORF-T	YIL141W, YIL140W	YIL141W, AXL2	-0.603449	-1.97316	-3.37694	0.0126833	0.045435	-3.50274	TRUE	s
1586	ST1586	ORF-T	YIL136W	OM45	0.266671	-5.32346	1.16854	0.282621	0.397451	-6.58622	FALSE	ns
1587	ST1587	other	snR68	SNR68	0.537474	-3.40678	2.2603	0.0601129	0.127632	-5.129	FALSE	ns
1588	ST1588	ORF-T	YIL134W	FLX1	3.20685	-2.35735	15.1271	2.05716958189612e-06	0.000454718	5.82707	TRUE	s
1589	ST1589	CUTs	CUT186	CUT186	1.42931	-5.54706	6.78899	0.000315553	0.00602268	0.5197	TRUE	s
1590	ST1590	CUTs	CUT187	CUT187	0.158845	-6.43917	0.9024	0.398236	0.515114	-6.8573	FALSE	ns
1591	ST1591	ORF-T	YIL130W	ASG1	-0.432578	-2.87788	-2.48517	0.0435064	0.102619	-4.79908	FALSE	ns
1592	ST1592	ORF-T	YIL128W	MET18	-0.63813	-3.50997	-3.74528	0.00786616	0.0343354	-2.98948	TRUE	s
1593	ST1593	ORF-T	YIL126W	STH1	-0.822096	-3.2058	-4.40764	0.00350779	0.0214386	-2.11381	TRUE	s
1594	ST1594	ORF-T	YIL125W	KGD1	-0.812652	-2.02494	-4.74043	0.00239616	0.0174514	-1.69821	TRUE	s
1595	ST1595	ORF-T	YIL124W	AYR1	-0.875504	-2.35181	-4.5525	0.0029657	0.0193799	-1.93089	TRUE	s
1596	ST1596	ORF-T	YIL123W	SIM1	-0.862144	0.133351	-4.74654	0.00237983	0.0173878	-1.69075	TRUE	s
1597	ST1597	ORF-T	YIL122W	POG1	-0.178877	-4.10396	-0.79037	0.456467	0.568297	-6.95523	FALSE	ns
1598	ST1598	ORF-T	YIL121W	QDR2	-0.624214	-1.95414	-3.59716	0.00950903	0.0382881	-3.19379	TRUE	s
1599	ST1599	ORF-T	YIL120W	QDR1	0.0485234	-3.93279	0.26652	0.797883	0.854271	-7.25649	FALSE	ns
1600	ST1600	SUTs	SUT179	SUT179	-0.0736195	-6.01198	-0.408007	0.696036	0.77276	-7.20283	FALSE	ns
1601	ST1601	ORF-T	YIL118W	RHO3	-0.140472	-2.34707	-0.748658	0.479605	0.588938	-6.98897	FALSE	ns
1602	ST1602	ORF-T	YIL116W	HIS5	0.0358618	-2.69094	0.158556	0.878708	0.915993	-7.28257	FALSE	ns
1603	ST1603	SUTs	SUT180	SUT180	-0.00166624	-6.51244	-0.00980342	0.992465	0.995339	-7.29687	FALSE	ns
1604	ST1604	ORF-T	YIL113W	SDP1	-0.562901	-5.00341	-2.79697	0.0279747	0.0759721	-4.34057	FALSE	ns
1605	ST1605	ORF-T	YIL112W	HOS4	-0.633392	-4.60251	-3.73476	0.00797196	0.0345483	-3.0039	TRUE	s
1606	ST1606	ORF-T	YIL111W	COX5B	-1.05602	-4.32462	-4.68947	0.00253752	0.0178161	-1.76079	TRUE	s
1607	ST1607	ORF-T	YIL110W	MNI1	-0.538489	-2.84473	-3.02346	0.0204327	0.0613995	-4.00998	FALSE	ns
1608	ST1608	ORF-T	YIL108W	YIL108W	0.0688634	-2.79309	0.372095	0.721353	0.792877	-7.2185	FALSE	ns
1609	ST1609	ORF-T	YIL106W	MOB1	-0.280719	-2.93161	-1.33413	0.225874	0.334669	-6.39443	FALSE	ns
1610	ST1610	ORF-T	YIL103W	DPH1	-0.434423	-3.43857	-2.15896	0.0695969	0.142006	-5.27653	FALSE	ns
1611	ST1611	SUTs	SUT181	SUT181	-0.0394235	-4.39723	-0.179888	0.862579	0.904365	-7.27845	FALSE	ns
1612	ST1612	other	YIL100W	YIL100W	-0.250506	-5.81861	-1.48632	0.182825	0.28524	-6.2055	FALSE	ns
1613	ST1613	other	YIL100W, YIL099W	YIL100W, SGA1	0.0104722	-6.34103	0.0617299	0.952585	0.968255	-7.29475	FALSE	ns
1614	ST1614	ORF-T	YIL097W	FYV10	0.219572	-5.13351	1.16744	0.283037	0.397805	-6.58744	FALSE	ns
1615	ST1615	ORF-T	YIL095W	PRK1	-0.189636	-4.07682	-0.746542	0.4808	0.589907	-6.99064	FALSE	ns
1616	ST1616	CUTs	CUT188	CUT188	0.824911	-5.64961	3.56702	0.00988712	0.0392677	-3.2357	TRUE	s
1617	ST1617	ORF-T	YIL092W	YIL092W	-0.399053	-5.27505	-1.30631	0.234653	0.344379	-6.42772	FALSE	ns
1618	ST1618	ORF-T	YIL090W	ICE2	-0.169473	-1.50861	-0.794394	0.454276	0.566061	-6.9519	FALSE	ns
1619	ST1619	ORF-T	YIL089W	YIL089W	0.629658	-5.0208	2.29673	0.0570344	0.123182	-5.07574	FALSE	ns
1620	ST1620	SUTs	SUT182	SUT182	0.346223	-4.55176	2.00952	0.0864078	0.165255	-5.49182	FALSE	ns
1621	ST1621	CUTs	CUT189	CUT189	0.416912	-6.07332	2.22508	0.06325	0.132285	-5.18038	FALSE	ns
1622	ST1622	CUTs	CUT190	CUT190	0.551527	-6.59775	2.14924	0.070583	0.143494	-5.29063	FALSE	ns
1623	ST1623	ORF-T	YIL078W	THS1	-0.656765	-0.631456	-3.76966	0.00762674	0.0337919	-2.95613	TRUE	s
1624	ST1624	ORF-T	YIL076W	SEC28	-0.331797	-1.28254	-1.82657	0.112562	0.19942	-5.75001	FALSE	ns
1625	ST1625	CUTs	CUT191	CUT191	0.444711	-4.95486	1.41072	0.203189	0.309157	-6.30072	FALSE	ns
1626	ST1626	SUTs	SUT183	SUT183	-0.114034	-4.1944	-0.643819	0.541172	0.642514	-7.06681	FALSE	ns
1627	ST1627	SUTs	SUT184	SUT184	-0.0656177	-5.89446	-0.271074	0.794524	0.851803	-7.2551	FALSE	ns
1628	ST1628	ORF-T	YIL064W	YIL064W	-0.423813	-2.65192	-2.31391	0.0556386	0.120927	-5.05058	FALSE	ns
1629	ST1629	CUTs	CUT192	CUT192	0.54009	-5.06142	1.68365	0.138207	0.23222	-5.946	FALSE	ns
1630	ST1630	ORF-T	YIL056W	VHR1	-1.13624	-2.16744	-6.09454	0.000593303	0.00813322	-0.170808	TRUE	s
1631	ST1631	ORF-T	YIL053W	RHR2	-0.934426	0.733901	-5.11058	0.00159756	0.0142545	-1.25515	TRUE	s
1632	ST1632	ORF-T	YIL050W	PCL7	-0.233401	-2.93592	-1.1284	0.298068	0.41397	-6.63024	FALSE	ns
1633	ST1633	ORF-T	YIL049W	DFG10	-0.415825	-2.47382	-1.98257	0.089845	0.169679	-5.53027	FALSE	ns
1634	ST1634	ORF-T	YIL048W	NEO1	-0.7986	-3.1803	-4.10819	0.00501224	0.0265101	-2.50179	TRUE	s
1635	ST1635	CUTs	CUT193	CUT193	-0.987127	-3.54572	-1.43729	0.195808	0.300468	-6.26755	FALSE	ns
1636	ST1636	ORF-T	YIL046W-A	YIL046W-A	0.41624	-6.20324	2.32486	0.0547679	0.119745	-5.03455	FALSE	ns
1637	ST1637	ORF-T	YIL046W	MET30	-0.33406	-3.97692	-1.93074	0.0968416	0.179012	-5.60385	FALSE	ns
1638	ST1638	ORF-T	YIL045W	PIG2	-0.549794	-5.60594	-2.60785	0.0365269	0.0908115	-4.6185	FALSE	ns
1639	ST1639	CUTs	CUT194	CUT194	1.55188	-5.67473	8.43232	8.49541835861363e-05	0.00283594	1.94648	TRUE	s
1640	ST1640	ORF-T	YIL041W	GVP36	-0.808407	-1.27889	-4.77336	0.00230949	0.0171024	-1.65798	TRUE	s
1641	ST1641	ORF-T	YIL040W	APQ12	-0.264876	-1.27132	-1.29325	0.238877	0.34966	-6.44321	FALSE	ns
1642	ST1642	ORF-T	YIL039W	TED1	-0.805623	-2.10015	-3.52263	0.0104743	0.0405586	-3.29767	TRUE	s
1643	ST1643	SUTs	SUT185	SUT185	-0.790591	-5.53369	-4.03765	0.00546256	0.027698	-2.59511	TRUE	s
1644	ST1644	SUTs	SUT186	SUT186	-0.26077	-4.7741	-1.2078	0.26817	0.381406	-6.54219	FALSE	ns
1645	ST1645	ORF-T	YIL036W	CST6	-0.160363	-3.0531	-0.808033	0.446906	0.558786	-6.94049	FALSE	ns
1646	ST1646	SUTs	SUT187	SUT187	1.37817	-3.22679	7.13763	0.00023415	0.00505562	0.845352	TRUE	s
1647	ST1647	SUTs	SUT188	SUT188	1.22889	-4.84966	6.05195	0.000617791	0.00831958	-0.215081	TRUE	s
1648	ST1648	ORF-T	YIL031W, YIL030W-A	ULP2, YIL030W-A	-0.206831	-3.43102	-1.20368	0.269655	0.383069	-6.54685	FALSE	ns
1649	ST1649	other	YIL028W	YIL028W	0.194289	-5.54709	1.00248	0.35106	0.468337	-6.76134	FALSE	ns
1650	ST1650	ORF-T	YIL022W	TIM44	-0.888045	-3.30395	-4.81571	0.00220311	0.0169152	-1.60648	TRUE	s
1651	ST1651	ORF-T	YIL021W	RPB3	-0.548577	-3.00622	-2.8678	0.0253402	0.0706843	-4.23684	FALSE	ns
1652	ST1652	ORF-T	YIL019W	FAF1	-0.580221	-4.06753	-3.41295	0.0120939	0.0441721	-3.45182	TRUE	s
1653	ST1653	ORF-T	YIL018W	RPL2B	0.619112	-3.20599	2.89494	0.0244014	0.0688423	-4.19716	FALSE	ns
1654	ST1654	ORF-T	YIL016W	SNL1	-0.505109	-3.19101	-2.5916	0.03738	0.09227	-4.64242	FALSE	ns
1655	ST1655	ORF-T	YIL015W	BAR1	-0.334228	-1.33011	-1.87794	0.10452	0.188404	-5.67824	FALSE	ns
1656	ST1656	ORF-T	YIL014W	MNT3	-0.250458	-3.44384	-1.1549	0.287793	0.402699	-6.60129	FALSE	ns
1657	ST1657	SUTs	SUT189	SUT189	0.105201	-5.21857	0.450987	0.666283	0.749452	-7.18227	FALSE	ns
1658	ST1658	ORF-T	YIL011W	TIR3	0.119889	-2.49555	0.64938	0.537786	0.639749	-7.06293	FALSE	ns
1659	ST1659	ORF-T	YIL010W	DOT5	-0.504456	-3.17221	-1.65911	0.14314	0.23836	-5.97905	FALSE	ns
1660	ST1660	SUTs	SUT190	SUT190	-0.0180023	-5.53839	-0.092423	0.929074	0.950109	-7.29204	FALSE	ns
1661	ST1661	ORF-T	YIL009W	FAA3	-0.659407	-2.68191	-3.371	0.0127835	0.0456589	-3.51116	TRUE	s
1662	ST1662	ORF-T	YIL008W	URM1	-0.179681	-2.9046	-0.957111	0.371881	0.489217	-6.80579	FALSE	ns
1663	ST1663	ORF-T	YIL006W	YIA6	-0.508345	-3.42325	-3.00524	0.0209508	0.0623126	-4.03644	FALSE	ns
1664	ST1664	ORF-T	YIL005W	EPS1	-0.452948	-3.02685	-2.43877	0.0464956	0.107032	-4.86733	FALSE	ns
1665	ST1665	ORF-T	YIL003W	CFD1	-0.472053	-3.77365	-1.68158	0.138618	0.232748	-5.94881	FALSE	ns
1666	ST1666	ORF-T	YIL002W-A	YIL002W-A	0.0752583	-1.95026	0.262439	0.800897	0.856741	-7.25771	FALSE	ns
1667	ST1667	ORF-T	YIL001W	YIL001W	-0.0941763	-4.48447	-0.549784	0.600369	0.69454	-7.12776	FALSE	ns
1668	ST1668	CUTs	CUT195	CUT195	0.173269	-6.3698	0.732514	0.48877	0.595965	-7.00161	FALSE	ns
1669	ST1669	SUTs	SUT191	SUT191	0.931264	-5.22382	3.62944	0.00912135	0.0372699	-3.14901	TRUE	s
1670	ST1670	ORF-T	YIR003W	YIR003W	-0.171204	-4.4447	-0.984803	0.35906	0.476476	-6.77884	FALSE	ns
1671	ST1671	ORF-T	YIR004W	DJP1	-0.235889	-3.50476	-1.19933	0.271235	0.384702	-6.55178	FALSE	ns
1672	ST1672	ORF-T	YIR005W	IST3	-0.440109	-5.50827	-1.38399	0.210866	0.318466	-6.33376	FALSE	ns
1673	ST1673	ORF-T	YIR007W	YIR007W	-0.118071	-4.49899	-0.66107	0.530713	0.63403	-7.0547	FALSE	ns
1674	ST1674	ORF-T	YIR009W	MSL1	0.242041	-4.55813	0.890792	0.404003	0.519249	-6.86793	FALSE	ns
1675	ST1675	ORF-T	YIR010W	DSN1	-0.721519	-4.26973	-4.19966	0.00448813	0.0249649	-2.38187	TRUE	s
1676	ST1676	ORF-T	YIR012W	SQT1	-0.849397	-1.60331	-4.93748	0.00192647	0.0157585	-1.45986	TRUE	s
1677	ST1677	ORF-T	YIR014W	YIR014W	-0.522792	-5.92552	-2.81907	0.0271226	0.0742152	-4.30817	FALSE	ns
1678	ST1678	other	YIR015W, YIR016W, YIR017W-A	RPR2, YIR016W, YIR017W-A	-1.04735	-4.32419	-5.90202	0.000713501	0.00902361	-0.372771	TRUE	s
1679	ST1679	SUTs	SUT192	SUT192	0.339895	-6.48916	1.58961	0.158022	0.256389	-6.07148	FALSE	ns
1680	ST1680	ORF-T	YIR018W	YAP5	0.0937098	-4.30954	0.477412	0.648303	0.734797	-7.16867	FALSE	ns
1681	ST1681	SUTs	SUT193	SUT193	-0.606069	-4.71459	-3.07094	0.0191461	0.0589273	-3.94115	FALSE	ns
1682	ST1682	SUTs	SUT194	SUT194	0.191795	-6.31498	0.997027	0.353512	0.470658	-6.76676	FALSE	ns
1683	ST1683	ORF-T	YIR021W	MRS1	-0.0343072	-3.57006	-0.183861	0.859583	0.902262	-7.27763	FALSE	ns
1684	ST1684	other	YIR021W-A, YIR022W	YIR021W-A, SEC11	-0.360862	-1.61829	-1.53398	0.170964	0.271833	-6.14419	FALSE	ns
1685	ST1685	ORF-T	YIR023W	DAL81	-0.0784799	-3.51549	-0.407713	0.696242	0.77287	-7.20296	FALSE	ns
1686	ST1686	ORF-T	YIR025W	MND2	-0.0367831	-5.90995	-0.174477	0.866664	0.907181	-7.27954	FALSE	ns
1687	ST1687	SUTs	SUT195	SUT195	-1.00713	-5.59449	-3.94925	0.00609097	0.0296278	-2.71307	TRUE	s
1688	ST1688	ORF-T	YIR028W	DAL4	0.697242	-5.01847	3.9664	0.00596311	0.0291619	-2.6901	TRUE	s
1689	ST1689	ORF-T	YIR029W	DAL2	-0.301771	-6.03355	-1.07625	0.31917	0.435297	-6.68586	FALSE	ns
1690	ST1690	SUTs	SUT196	SUT196	-0.142403	-6.47168	-0.82578	0.437442	0.549694	-6.92541	FALSE	ns
1691	ST1691	ORF-T	YIR033W	MGA2	-0.24102	-2.51402	-1.37541	0.213383	0.321201	-6.34429	FALSE	ns
1692	ST1692	SUTs	SUT197	SUT197	0.103602	-6.36923	0.583154	0.578948	0.675672	-7.10712	FALSE	ns
1693	ST1693	other	YIR036W-A, YIR037W	YIR036W-A, HYR1	-0.0447831	-0.651989	-0.26383	0.799869	0.855893	-7.2573	FALSE	ns
1694	ST1694	ORF-T	YJL218W	YJL218W	-0.729574	-5.81422	-2.93068	0.0232215	0.066458	-4.145	FALSE	ns
1695	ST1695	ORF-T	YJL217W	YJL217W	-0.610608	-1.47766	-2.85293	0.0258707	0.071779	-4.2586	FALSE	ns
1696	ST1696	ORF-T	YJL214W	HXT8	-0.968701	-5.82778	-4.15736	0.0047226	0.0256098	-2.43718	TRUE	s
1697	ST1697	CUTs	CUT196	CUT196	-0.680816	-6.24085	-2.01519	0.0857013	0.164481	-5.48371	FALSE	ns
1698	ST1698	ORF-T	YJL213W	YJL213W	-1.76951	-5.60769	-7.68422	0.000150032	0.00404744	1.32999	TRUE	s
1699	ST1699	SUTs	SUT198	SUT198	0.11244	-6.59347	0.650336	0.537206	0.639162	-7.06227	FALSE	ns
1700	ST1700	ORF-T	YJL210W	PEX2	-1.19772	-2.90883	-7.10115	0.000241444	0.00512656	0.811894	TRUE	s
1701	ST1701	ORF-T	YJL209W	CBP1	-0.454402	-3.85297	-2.38932	0.0499165	0.112382	-4.94	FALSE	ns
1702	ST1702	SUTs	SUT199	SUT199	0.587412	-5.87797	1.89649	0.101756	0.185242	-5.65217	FALSE	ns
1703	ST1703	ORF-T	YJL203W	PRP21	0.156242	-4.6196	0.72708	0.491881	0.599457	-7.00581	FALSE	ns
1704	ST1704	ORF-T	YJL201W	ECM25	-0.374755	-3.01044	-2.20623	0.0649979	0.13524	-5.20785	FALSE	ns
1705	ST1705	ORF-T	YJL198W	PHO90	-1.07294	-2.47502	-6.33522	0.000473905	0.00736376	0.0750931	TRUE	s
1706	ST1706	ORF-T	YJL197W	UBP12	-0.773187	-3.81141	-4.20898	0.00443823	0.0248459	-2.36972	TRUE	s
1707	ST1707	SUTs	SUT200	SUT200	-0.0298111	-6.25139	-0.167642	0.87183	0.910782	-7.28088	FALSE	ns
1708	ST1708	ORF-T	YJL194W	CDC6	-0.708953	-3.34891	-3.58807	0.00962141	0.0385705	-3.20642	TRUE	s
1709	ST1709	ORF-T	YJL193W	YJL193W	-0.326031	-2.51447	-1.37756	0.212748	0.320312	-6.34165	FALSE	ns
1710	ST1710	ORF-T	YJL191W	RPS14B	0.740688	-0.366134	4.04999	0.00538073	0.027509	-2.57874	TRUE	s
1711	ST1711	ORF-T	YJL189W	RPL39	1.55627	-3.67688	6.40342	0.000445189	0.00713086	0.143475	TRUE	s
1712	ST1712	SUTs	SUT201	SUT201	-0.325069	-6.36049	-1.91079	0.099675	0.182629	-5.63202	FALSE	ns
1713	ST1713	ORF-T	YJL186W	MNN5	-0.868426	-1.80324	-4.11245	0.00498638	0.0264233	-2.49618	TRUE	s
1714	ST1714	ORF-T	YJL184W	GON7	-0.305639	-3.66432	-1.48686	0.182689	0.285088	-6.20482	FALSE	ns
1715	ST1715	ORF-T	YJL183W	MNN11	-0.580253	-2.08687	-3.3011	0.014029	0.048236	-3.61048	TRUE	s
1716	ST1716	ORF-T	YJL181W	YJL181W	-0.621643	-4.91232	-2.75653	0.0296074	0.0790109	-4.3999	FALSE	ns
1717	ST1717	ORF-T	YJL179W	PFD1	-0.0870542	-3.41647	-0.399889	0.701724	0.776703	-7.20649	FALSE	ns
1718	ST1718	ORF-T	YJL177W	RPL17B	-0.597803	-0.154369	-3.5311	0.0103593	0.0403763	-3.28582	TRUE	s
1719	ST1719	ORF-T	YJL174W	KRE9	-0.417247	-1.07446	-2.37112	0.0512395	0.114439	-4.96671	FALSE	ns
1720	ST1720	ORF-T	YJL172W	CPS1	-0.357784	-0.477128	-2.08895	0.0770203	0.152179	-5.37779	FALSE	ns
1721	ST1721	SUTs	SUT202	SUT202	1.23306	-4.89553	4.51726	0.00308844	0.019951	-1.9751	TRUE	s
1722	ST1722	ORF-T	YJL167W	ERG20	-0.313924	-1.21015	-1.81262	0.114847	0.202366	-5.76939	FALSE	ns
1723	ST1723	ORF-T	YJL166W	QCR8	-0.704862	-1.05319	-2.61234	0.0362949	0.0903274	-4.6119	FALSE	ns
1724	ST1724	CUTs	CUT197	CUT197	1.54464	-4.47963	4.86026	0.00209706	0.016433	-1.55259	TRUE	s
1725	ST1725	SUTs	SUT203	SUT203	0.329011	-5.88356	1.34643	0.222087	0.330608	-6.37958	FALSE	ns
1726	ST1726	CUTs	CUT198	CUT198	2.10224	-4.84983	8.38162	8.81718165438748e-05	0.00287527	1.9063	TRUE	s
1727	ST1727	ORF-T	YJL161W	FMP33	1.28852	-4.92082	7.51234	0.000172081	0.00436019	1.18087	TRUE	s
1728	ST1728	CUTs	CUT199	CUT199	1.08107	-5.6871	3.82603	0.00710334	0.0324469	-2.87936	TRUE	s
1729	ST1729	ORF-T	YJL159W	HSP150	0.139633	1.59659	0.780935	0.461632	0.57275	-6.963	FALSE	ns
1730	ST1730	SUTs	SUT204	SUT204	0.103516	-3.60795	0.458864	0.660897	0.74547	-7.17829	FALSE	ns
1731	ST1731	CUTs	CUT200	CUT200	0.475387	-5.23022	1.52266	0.173716	0.275291	-6.15884	FALSE	ns
1732	ST1732	CUTs	CUT201	CUT201	0.119195	-6.32452	0.502489	0.631471	0.720888	-7.1551	FALSE	ns
1733	ST1733	ORF-T	YJL150W, YJL149W	YJL150W, YJL149W	0.214307	-3.31933	1.2543	0.251867	0.363914	-6.48885	FALSE	ns
1734	ST1734	ORF-T	YJL148W	RPA34	-0.24712	-1.96814	-0.893647	0.402579	0.518335	-6.86532	FALSE	ns
1735	ST1735	CUTs	CUT202	CUT202	1.87567	-4.76832	5.94484	0.000684562	0.00884026	-0.327438	TRUE	s
1736	ST1736	CUTs	CUT203	CUT203	2.45463	-5.12871	14.4609	2.75680396291047e-06	0.000477321	5.53609	TRUE	s
1737	ST1737	ORF-T	YJL146W	IDS2	-0.339654	-4.46692	-1.80918	0.115418	0.20298	-5.77417	FALSE	ns
1738	ST1738	ORF-T	YJL145W	SFH5	-0.479482	-2.40494	-2.62033	0.0358858	0.0896774	-4.60014	FALSE	ns
1739	ST1739	ORF-T	YJL144W	YJL144W	0.289579	-4.32111	1.34242	0.223316	0.331825	-6.38443	FALSE	ns
1740	ST1740	ORF-T	YJL143W	TIM17	-0.340787	-0.966315	-1.85981	0.107293	0.192218	-5.70365	FALSE	ns
1741	ST1741	ORF-T	YJL140W	RPB4	0.0732639	-2.88185	0.274225	0.792203	0.849941	-7.25413	FALSE	ns
1742	ST1742	CUTs	CUT204	CUT204	1.86884	-5.34149	10.1249	2.71098305751798e-05	0.00167238	3.1714	TRUE	s
1743	ST1743	ORF-T	YJL135W, YJL134W	YJL135W, LCB3	-0.521167	-2.65565	-2.6596	0.0339434	0.0864156	-4.54235	FALSE	ns
1744	ST1744	ORF-T	YJL133W	MRS3	-0.184841	-2.18048	-0.949402	0.375512	0.493	-6.81319	FALSE	ns
1745	ST1745	ORF-T	YJL132W	YJL132W	0.317867	-5.14607	1.85965	0.107316	0.192218	-5.70386	FALSE	ns
1746	ST1746	SUTs	SUT205	SUT205	0.935173	-3.54969	4.71353	0.00246967	0.0176593	-1.7312	TRUE	s
1747	ST1747	CUTs	CUT205	CUT205	0.586844	-4.44569	1.50152	0.178964	0.281511	-6.18605	FALSE	ns
1748	ST1748	CUTs	CUT206	CUT206	0.577872	-5.56556	3.13269	0.017601	0.0558929	-3.85193	FALSE	ns
1749	ST1749	ORF-T	YJL126W	NIT2	0.0555187	-4.58478	0.246281	0.812866	0.866118	-7.26237	FALSE	ns
1750	ST1750	CUTs	CUT207	CUT207	1.48829	-4.71655	8.25482	9.68441988005544e-05	0.00303392	1.80481	TRUE	s
1751	ST1751	ORF-T	YJL122W	ALB1	-0.4791	-2.92881	-1.54582	0.16813	0.268358	-6.12881	FALSE	ns
1752	ST1752	ORF-T	YJL118W	YJL118W	-0.600734	-3.27775	-2.98384	0.0215774	0.063347	-4.06756	FALSE	ns
1753	ST1753	ORF-T	YJL117W	PHO86	-0.517972	-1.75982	-2.25989	0.0601488	0.127652	-5.1296	FALSE	ns
1754	ST1754	SUTs	SUT206	SUT206	-0.387142	-5.74251	-2.06742	0.0794592	0.155639	-5.40879	FALSE	ns
1755	ST1755	ORF-T	YJL115W	ASF1	0.0281378	-3.93323	0.157168	0.87976	0.916664	-7.28282	FALSE	ns
1756	ST1756	other	tD(GUC)J1	tD(GUC)J1	-0.278748	-6.36563	-1.50459	0.178194	0.280663	-6.18211	FALSE	ns
1757	ST1757	ORF-T	YJL112W	MDV1	-0.352407	-4.60519	-1.87682	0.10469	0.188582	-5.67982	FALSE	ns
1758	ST1758	ORF-T	YJL111W	CCT7	-0.757579	-1.65122	-4.37534	0.00364309	0.0219861	-2.15501	TRUE	s
1759	ST1759	CUTs	CUT208	CUT208	2.03406	-5.6711	10.355	2.35188686504136e-05	0.00156973	3.32222	TRUE	s
1760	ST1760	SUTs	SUT207	SUT207	0.244572	-5.68469	1.2335	0.25905	0.371634	-6.51286	FALSE	ns
1761	ST1761	ORF-T	YJL106W	IME2	-0.307753	-4.87932	-1.51274	0.176162	0.278005	-6.17164	FALSE	ns
1762	ST1762	ORF-T	YJL105W	SET4	0.0635264	-6.5175	0.377003	0.717869	0.789884	-7.21644	FALSE	ns
1763	ST1763	ORF-T	YJL104W	PAM16	-0.411297	-3.24563	-1.91057	0.0997066	0.182629	-5.63233	FALSE	ns
1764	ST1764	ORF-T	YJL102W	MEF2	-0.782233	-5.51068	-4.48859	0.00319247	0.0204183	-2.0112	TRUE	s
1765	ST1765	ORF-T	YJL100W	LSB6	0.0335499	-4.50595	0.196251	0.850254	0.895128	-7.27495	FALSE	ns
1766	ST1766	ORF-T	YJL099W	CHS6	0.143452	-4.50389	0.781593	0.46127	0.572416	-6.96246	FALSE	ns
1767	ST1767	ORF-T	YJL098W	SAP185	-0.37768	-3.52356	-2.14148	0.0713797	0.14475	-5.30187	FALSE	ns
1768	ST1768	ORF-T	YJL097W	PHS1	-0.827598	-0.93787	-4.81892	0.00219529	0.0168932	-1.60259	TRUE	s
1769	ST1769	ORF-T	YJL096W	MRPL49	-0.804366	-3.13497	-2.72421	0.0309845	0.081431	-4.44737	FALSE	ns
1770	ST1770	ORF-T	YJL095W	BCK1	-0.673008	-4.06303	-2.93821	0.0229807	0.0660013	-4.13402	FALSE	ns
1771	ST1771	ORF-T	YJL092W	SRS2	-0.773534	-3.9131	-3.54692	0.0101484	0.0398923	-3.26373	TRUE	s
1772	ST1772	SUTs	SUT208	SUT208	0.401641	-6.43332	2.37707	0.0508027	0.113638	-4.95798	FALSE	ns
1773	ST1773	ORF-T	YJL089W	SIP4	0.0551774	-6.46902	0.275037	0.791605	0.849425	-7.25388	FALSE	ns
1774	ST1774	ORF-T	YJL088W	ARG3	-0.60656	-5.59023	-3.27289	0.0145683	0.0494127	-3.65072	TRUE	s
1775	ST1775	ORF-T	YJL085W	EXO70	-0.105583	-4.37048	-0.574601	0.584396	0.680501	-7.11251	FALSE	ns
1776	ST1776	ORF-T	YJL083W	TAX4	-1.4847	-4.22534	-6.52953	0.000397114	0.00672452	0.268449	TRUE	s
1777	ST1777	ORF-T	YJL082W	IML2	-0.651277	-3.48091	-3.30292	0.013995	0.0481872	-3.60789	TRUE	s
1778	ST1778	SUTs	SUT209	SUT209	0.0992971	-6.37916	0.522655	0.618105	0.709864	-7.14372	FALSE	ns
1779	ST1779	other	YJL077W-B, YJL077W-A	YJL077W-B, YJL077W-A	-0.0868542	-4.31127	-0.474399	0.65034	0.735959	-7.17026	FALSE	ns
1780	ST1780	ORF-T	YJL076W	NET1	-0.674051	-2.42389	-3.52613	0.0104266	0.0404825	-3.29278	TRUE	s
1781	ST1781	ORF-T	YJL073W	JEM1	-0.0369852	-3.6329	-0.166306	0.872841	0.911575	-7.28113	FALSE	ns
1782	ST1782	ORF-T	YJL071W	ARG2	-0.161773	-4.66125	-0.810291	0.445694	0.557846	-6.93859	FALSE	ns
1783	ST1783	ORF-T	YJL062W-A	YJL062W-A	0.186495	-1.14574	1.04939	0.330501	0.447895	-6.71379	FALSE	ns
1784	ST1784	ORF-T	YJL062W	LAS21	-1.05793	-2.13686	-5.52165	0.00104073	0.0111297	-0.786115	TRUE	s
1785	ST1785	ORF-T	YJL061W	NUP82	-0.541267	-3.19682	-3.1825	0.0164522	0.0536518	-3.78022	FALSE	ns
1786	ST1786	ORF-T	YJL060W	BNA3	-0.564171	-2.12386	-3.11822	0.0179507	0.0566114	-3.87281	FALSE	ns
1787	ST1787	ORF-T	YJL059W	YHC3	-0.312	-3.11173	-1.71908	0.131372	0.22368	-5.89797	FALSE	ns
1788	ST1788	ORF-T	YJL055W	YJL055W	-0.573745	-2.73323	-3.11691	0.0179828	0.0566114	-3.87471	FALSE	ns
1789	ST1789	ORF-T	YJL054W	TIM54	-0.465835	-3.01134	-2.6456	0.034623	0.0875143	-4.56296	FALSE	ns
1790	ST1790	ORF-T	YJL053W	PEP8	-0.688427	-3.439	-2.89787	0.0243022	0.0686581	-4.19288	FALSE	ns
1791	ST1791	CUTs	CUT209	CUT209	0.163589	-5.55741	0.773168	0.465914	0.576506	-6.96933	FALSE	ns
1792	ST1792	CUTs	CUT210	CUT210	2.50654	-5.11794	12.6339	6.60265191670111e-06	0.000800241	4.64997	TRUE	s
1793	ST1793	ORF-T	YJL052W	TDH1	-1.00029	-1.45764	-5.8048	0.000784458	0.0094558	-0.476583	TRUE	s
1794	ST1794	ORF-T	YJL051W	IRC8	-0.769091	-3.82569	-3.21342	0.0157798	0.0521122	-3.73583	FALSE	ns
1795	ST1795	ORF-T	YJL050W	MTR4	-0.880584	-2.55079	-4.1662	0.0046725	0.0254711	-2.4256	TRUE	s
1796	ST1796	ORF-T	YJL049W	YJL049W	-0.633457	-5.08254	-2.44233	0.0462589	0.106589	-4.86209	FALSE	ns
1797	ST1797	CUTs	CUT211	CUT211	0.546446	-5.88856	1.8995	0.101315	0.184793	-5.64794	FALSE	ns
1798	ST1798	ORF-T	YJL046W	YJL046W	-0.214895	-4.91369	-0.869444	0.41477	0.529067	-6.88719	FALSE	ns
1799	ST1799	ORF-T	YJL045W	YJL045W	0.136093	-6.51099	0.78865	0.457405	0.568828	-6.95665	FALSE	ns
1800	ST1800	ORF-T	YJL043W	YJL043W	-0.353281	-6.33474	-2.04527	0.0820493	0.159408	-5.44062	FALSE	ns
1801	ST1801	ORF-T	YJL042W	MHP1	-0.664806	-2.91603	-3.70421	0.00828813	0.0353569	-3.04583	TRUE	s
1802	ST1802	ORF-T	YJL041W	NSP1	-0.69382	-2.28828	-3.93581	0.00619325	0.0299851	-2.7311	TRUE	s
1803	ST1803	SUTs	SUT210	SUT210	-0.295263	-4.82181	-1.28837	0.240474	0.351291	-6.44898	FALSE	ns
1804	ST1804	ORF-T	YJL037W	IRC18	0.314895	-4.52419	1.22913	0.260585	0.373467	-6.51789	FALSE	ns
1805	ST1805	ORF-T	YJL036W	SNX4	-0.207043	-3.93061	-1.03522	0.336607	0.453291	-6.72832	FALSE	ns
1806	ST1806	ORF-T	YJL034W	KAR2	-0.553647	0.10966	-3.26186	0.0147851	0.0499799	-3.66647	TRUE	s
1807	ST1807	ORF-T	YJL033W	HCA4	-0.454318	-2.90845	-2.65945	0.0339507	0.0864156	-4.54258	FALSE	ns
1808	ST1808	ORF-T	YJL030W	MAD2	0.458018	-3.60899	2.40294	0.0489486	0.110717	-4.91998	FALSE	ns
1809	ST1809	ORF-T	YJL026W	RNR2	-0.0695039	0.102772	-0.404899	0.698212	0.774229	-7.20424	FALSE	ns
1810	ST1810	ORF-T	YJL025W	RRN7	-0.301469	-3.56591	-1.78232	0.119967	0.209164	-5.81131	FALSE	ns
1811	ST1811	other	YJL022W	YJL022W	-0.269904	-6.37214	-1.52775	0.172475	0.273791	-6.15226	FALSE	ns
1812	ST1812	CUTs	CUT212	CUT212	0.508533	-6.21583	1.54687	0.167881	0.268078	-6.12745	FALSE	ns
1813	ST1813	other	YJL019W, YJL016W	MPS3, YJL016W	-0.892338	-3.75595	-4.64082	0.00268121	0.0183249	-1.82089	TRUE	s
1814	ST1814	ORF-T	YJL014W	CCT3	-0.329504	-1.71075	-1.33497	0.225615	0.334354	-6.39342	FALSE	ns
1815	ST1815	CUTs	CUT213	CUT213	0.538909	-6.17198	2.20214	0.0653828	0.135653	-5.21379	FALSE	ns
1816	ST1816	SUTs	SUT211	SUT211	0.790225	-5.85243	1.60238	0.155182	0.252911	-6.05462	FALSE	ns
1817	ST1817	other	YJLWtau4, YJLWdelta10	YJLWtau4, YJLWdelta10	0.402463	-3.85676	1.91618	0.0989019	0.181666	-5.62442	FALSE	ns
1818	ST1818	ORF-T	YJL005W	CYR1	-0.50691	-3.35118	-2.89335	0.0244554	0.0689033	-4.19949	FALSE	ns
1819	ST1819	ORF-T	YJL003W	COX16	0.149084	-4.47371	0.376523	0.718209	0.790139	-7.21664	FALSE	ns
1820	ST1820	SUTs	SUT212	SUT212	-0.44509	-5.89605	-2.43813	0.0465388	0.107032	-4.86828	FALSE	ns
1821	ST1821	ORF-T	YJL001W	PRE3	-0.625762	-0.916417	-3.16782	0.0167822	0.054252	-3.80133	FALSE	ns
1822	ST1822	ORF-T	YJR001W	AVT1	-0.335296	-1.31198	-1.69024	0.136912	0.230735	-5.93711	FALSE	ns
1823	ST1823	ORF-T	YJR002W	MPP10	-0.811619	-3.08606	-3.53462	0.0103121	0.0402952	-3.28091	TRUE	s
1824	ST1824	ORF-T	YJR005W	APL1	-0.754172	-3.32162	-4.11204	0.00498889	0.0264233	-2.49672	TRUE	s
1825	ST1825	ORF-T	YJR006W	POL31	-0.0595661	-3.62014	-0.33497	0.747927	0.81338	-7.23325	FALSE	ns
1826	ST1826	ORF-T	YJR007W	SUI2	-0.251548	-0.751531	-1.39909	0.206498	0.313301	-6.31514	FALSE	ns
1827	ST1827	ORF-T	YJR008W	YJR008W	0.175617	-4.93552	0.804167	0.448986	0.560712	-6.94374	FALSE	ns
1828	ST1828	ORF-T	YJR010W	MET3	0.212916	-3.26687	1.24262	0.25588	0.368014	-6.50236	FALSE	ns
1829	ST1829	SUTs	SUT213	SUT213	0.652988	-4.8442	2.99683	0.0211947	0.0627811	-4.04867	FALSE	ns
1830	ST1830	CUTs	CUT214	CUT214	1.63765	-5.64909	8.38851	8.77265797342507e-05	0.00287364	1.91177	TRUE	s
1831	ST1831	SUTs	SUT214	SUT214	0.146985	-5.92701	0.505599	0.6294	0.719541	-7.15337	FALSE	ns
1832	ST1832	ORF-T	YJR013W	GPI14	-0.647006	-2.95214	-3.41823	0.01201	0.043976	-3.44436	TRUE	s
1833	ST1833	ORF-T	YJR014W	TMA22	-1.39401	-2.89317	-4.74591	0.00238149	0.0173878	-1.69151	TRUE	s
1834	ST1834	ORF-T	YJR015W	YJR015W	-2.91587	-2.11684	-15.12	2.06348987047734e-06	0.000454718	5.82404	TRUE	s
1835	ST1835	other	YJR018W, YJR020W	YJR018W, YJR020W	1.32187	-5.05238	4.99314	0.00181311	0.0152957	-1.39356	TRUE	s
1836	ST1836	ORF-T	YJR022W	LSM8	-0.0301995	-5.67292	-0.0688677	0.947112	0.963812	-7.29421	FALSE	ns
1837	ST1837	CUTs	CUT215	CUT215	0.226124	-6.49541	0.969773	0.365976	0.483711	-6.79353	FALSE	ns
1838	ST1838	ORF-T	YJR032W	CPR7	-0.154077	-3.28718	-0.714627	0.499061	0.605871	-7.01534	FALSE	ns
1839	ST1839	ORF-T	YJR034W	PET191	0.43542	-4.07195	1.84534	0.109555	0.19541	-5.72386	FALSE	ns
1840	ST1840	ORF-T	YJR035W	RAD26	0.119143	-5.60357	0.703822	0.505345	0.611685	-7.02349	FALSE	ns
1841	ST1841	ORF-T	YJR039W	YJR039W	-0.422387	-5.2628	-1.96155	0.0926208	0.173548	-5.56018	FALSE	ns
1842	ST1842	ORF-T	YJR040W	GEF1	-0.657133	-3.43054	-3.25019	0.0150185	0.0504922	-3.68317	FALSE	ns
1843	ST1843	ORF-T	YJR042W	NUP85	-0.731214	-3.46549	-3.61985	0.0092347	0.0375586	-3.1623	TRUE	s
1844	ST1844	ORF-T	YJR046W	TAH11	-0.50841	-3.15058	-2.22886	0.0629062	0.131869	-5.17488	FALSE	ns
1845	ST1845	SUTs	SUT215	SUT215	0.930989	-5.78119	2.27204	0.0591024	0.12632	-5.11184	FALSE	ns
1846	ST1846	ORF-T	YJR048W	CYC1	-2.80248	-3.79814	-13.6762	3.95804223645423e-06	0.000599675	5.17223	TRUE	s
1847	ST1847	ORF-T	YJR050W	ISY1	-0.0160437	-4.50038	-0.0832132	0.936122	0.955302	-7.29297	FALSE	ns
1848	ST1848	ORF-T	YJR051W	OSM1	-0.684168	-3.25475	-3.32316	0.0136224	0.0472439	-3.57908	TRUE	s
1849	ST1849	ORF-T	YJR052W	RAD7	-0.373431	-5.0598	-2.18204	0.0673113	0.138316	-5.24302	FALSE	ns
1850	ST1850	ORF-T	YJR053W	BFA1	-0.505265	-5.43596	-2.00619	0.0868261	0.165852	-5.49658	FALSE	ns
1851	ST1851	ORF-T	YJR054W	YJR054W	0.280901	-3.46916	0.94969	0.375376	0.492999	-6.81291	FALSE	ns
1852	ST1852	ORF-T	YJR055W	HIT1	0.0624353	-4.36665	0.3549	0.733612	0.801265	-7.22552	FALSE	ns
1853	ST1853	ORF-T	YJR057W	CDC8	-0.427192	-3.51455	-1.85544	0.107972	0.193201	-5.70976	FALSE	ns
1854	ST1854	ORF-T	YJR059W	PTK2	-0.759247	-3.68884	-3.6855	0.00848856	0.0357746	-3.07158	TRUE	s
1855	ST1855	ORF-T	YJR060W	CBF1	-0.199684	-4.10473	-1.12046	0.301205	0.417212	-6.63883	FALSE	ns
1856	ST1856	ORF-T	YJR061W	YJR061W	-0.0705348	-5.68856	-0.321039	0.757997	0.821117	-7.23839	FALSE	ns
1857	ST1857	ORF-T	YJR063W	RPA12	-0.332677	-1.23255	-1.89146	0.102499	0.186099	-5.65925	FALSE	ns
1858	ST1858	ORF-T	YJR064W	CCT5	-0.705549	-1.38026	-4.13436	0.00485575	0.0260166	-2.46737	TRUE	s
1859	ST1859	ORF-T	YJR066W	TOR1	-0.927015	-3.59961	-4.94985	0.00190062	0.0155997	-1.44509	TRUE	s
1860	ST1860	ORF-T	YJR068W	RFC2	0.115025	-2.70435	0.660796	0.530878	0.634066	-7.05489	FALSE	ns
1861	ST1861	ORF-T	YJR074W	MOG1	-1.08366	-3.60435	-5.8994	0.000715316	0.0090295	-0.375554	TRUE	s
1862	ST1862	ORF-T	YJR075W	HOC1	-0.0905896	-1.56671	-0.503824	0.630582	0.720326	-7.15436	FALSE	ns
1863	ST1863	other	YJR078W, YJR079W	BNA2, YJR079W	0.283209	-6.07983	1.46481	0.188422	0.292029	-6.23285	FALSE	ns
1864	ST1864	CUTs	CUT216	CUT216	0.226631	-6.39879	1.17422	0.280491	0.39522	-6.57991	FALSE	ns
1865	ST1865	ORF-T	YJR084W	CSN12	-0.210098	-4.4493	-1.08953	0.313684	0.429426	-6.67187	FALSE	ns
1866	ST1866	CUTs	CUT217	CUT217	0.972039	-5.23105	4.98358	0.00183205	0.0152958	-1.40492	TRUE	s
1867	ST1867	ORF-T	YJR089W	BIR1	-0.148597	-4.8628	-0.752786	0.47728	0.587074	-6.9857	FALSE	ns
1868	ST1868	ORF-T	YJR092W	BUD4	-0.633912	-3.88272	-3.50278	0.010749	0.0409327	-3.32546	TRUE	s
1869	ST1869	CUTs	CUT218	CUT218	0.22916	-6.47356	0.68373	0.517168	0.621833	-7.03837	FALSE	ns
1870	ST1870	ORF-T	YJR094W-A	RPL43B	0.2351	0.155755	1.21696	0.26489	0.377977	-6.53179	FALSE	ns
1871	ST1871	SUTs	SUT216	SUT216	1.30319	-5.12367	5.49371	0.00107075	0.0113011	-0.817244	TRUE	s
1872	ST1872	ORF-T	YJR095W	SFC1	-0.0171876	-6.57418	-0.0976987	0.92504	0.947183	-7.29147	FALSE	ns
1873	ST1873	ORF-T	YJR096W	YJR096W	-0.867113	-4.30041	-4.10033	0.00506033	0.0265762	-2.51215	TRUE	s
1874	ST1874	ORF-T	YJR097W	JJJ3	-0.207805	-4.40985	-1.19512	0.272769	0.38621	-6.55652	FALSE	ns
1875	ST1875	CUTs	CUT219	CUT219	0.403556	-6.16524	2.06059	0.080249	0.156789	-5.41861	FALSE	ns
1876	ST1876	ORF-T	YJR099W	YUH1	-0.271849	-3.60637	-1.52544	0.173037	0.274444	-6.15525	FALSE	ns
1877	ST1877	ORF-T	YJR101W	RSM26	-0.942308	-2.99657	-4.17819	0.00460549	0.0252763	-2.40991	TRUE	s
1878	ST1878	ORF-T	YJR103W	URA8	0.489854	-2.55354	2.73412	0.0305551	0.0805855	-4.43281	FALSE	ns
1879	ST1879	SUTs	SUT217	SUT217	-0.291402	-4.13178	-1.40439	0.204983	0.311457	-6.30858	FALSE	ns
1880	ST1880	ORF-T	YJR105W	ADO1	-0.265714	0.512522	-1.53183	0.171485	0.272517	-6.14698	FALSE	ns
1881	ST1881	other	YJR106W, YJR107W	ECM27, YJR107W	-0.890643	-3.34031	-5.2327	0.00140332	0.013236	-1.11332	TRUE	s
1882	ST1882	ORF-T	YJR108W	ABM1	0.478658	-3.7636	2.67418	0.0332505	0.0852602	-4.52091	FALSE	ns
1883	ST1883	ORF-T	YJR110W	YMR1	-0.267501	-4.65393	-1.41691	0.201449	0.307437	-6.29303	FALSE	ns
1884	ST1884	ORF-T	YJR112W	NNF1	-0.890527	-5.47205	-4.692	0.0025303	0.0178136	-1.75767	TRUE	s
1885	ST1885	ORF-T	YJR112W-A	YJR112W-A	0.550984	-3.21775	3.00141	0.0210616	0.0625282	-4.04202	FALSE	ns
1886	ST1886	ORF-T	YJR115W, YJR116W	YJR115W, YJR116W	-1.10241	-3.0613	-4.70609	0.00249043	0.0177206	-1.74034	TRUE	s
1887	ST1887	ORF-T	YJR117W	STE24	-0.615968	-0.0463539	-3.42677	0.0118756	0.0437449	-3.43232	TRUE	s
1888	ST1888	CUTs	CUT220	CUT220	1.05721	-5.3196	5.89689	0.00071706	0.0090295	-0.378219	TRUE	s
1889	ST1889	ORF-T	YJR120W, YJR121W	YJR120W, ATP2	-0.786178	0.461675	-4.19924	0.00449039	0.0249649	-2.38242	TRUE	s
1890	ST1890	ORF-T	YJR122W	CAF17	-0.243944	-4.4712	-1.42961	0.197916	0.302935	-6.27717	FALSE	ns
1891	ST1891	ORF-T	YJR123W	RPS5	0.0485328	1.72637	0.267075	0.797474	0.853958	-7.25632	FALSE	ns
1892	ST1892	other	snR3	SNR3	2.21393	-3.06413	8.7574	6.72334275127406e-05	0.00254647	2.19896	TRUE	s
1893	ST1893	CUTs	CUT221	CUT221	2.50121	-2.07186	13.2603	4.83257424809648e-06	0.00070285	4.96948	TRUE	s
1894	ST1894	CUTs	CUT222	CUT222	4.43096	-3.74433	25.1728	7.24995069986955e-08	7.53166306992163e-05	8.85118	TRUE	s
1895	ST1895	CUTs	CUT223	CUT223	4.88424	-4.05168	25.904	5.99893688361487e-08	7.35682130389187e-05	9.0016	TRUE	s
1896	ST1896	ORF-T	YJR131W	MNS1	-0.836159	-3.77573	-4.65892	0.00262672	0.0181183	-1.79849	TRUE	s
1897	ST1897	ORF-T	YJR132W	NMD5	-0.602704	-2.54507	-3.19692	0.0161348	0.0529715	-3.7595	FALSE	ns
1898	ST1898	ORF-T	YJR133W	XPT1	-0.920815	-3.35745	-4.75596	0.00235485	0.0172999	-1.67922	TRUE	s
1899	ST1899	ORF-T	YJR135W-A	TIM8	-0.270431	-1.88264	-0.898185	0.400323	0.516436	-6.86117	FALSE	ns
1900	ST1900	ORF-T	YJR138W	IML1	-0.409419	-4.53322	-2.3399	0.0535939	0.117998	-5.0125	FALSE	ns
1901	ST1901	ORF-T	YJR141W	YJR141W	-0.0586054	-4.6732	-0.325308	0.754906	0.818761	-7.23684	FALSE	ns
1902	ST1902	ORF-T	YJR142W	YJR142W	-1.80044	-4.59592	-6.27434	0.000501314	0.00756339	0.0135753	TRUE	s
1903	ST1903	ORF-T	YJR144W	MGM101	-0.646504	-2.99766	-3.50764	0.010681	0.0409327	-3.31865	TRUE	s
1904	ST1904	ORF-T	YJR146W, YJR147W	YJR146W, HMS2	-0.411307	-1.48234	-2.22908	0.0628857	0.131869	-5.17455	FALSE	ns
1905	ST1905	ORF-T	YJR148W	BAT2	-1.61436	-2.16087	-8.58377	7.61097934491406e-05	0.00271309	2.06522	TRUE	s
1906	ST1906	ORF-T	YJR149W	YJR149W	1.13809	-3.96873	4.2685	0.0041336	0.0237813	-2.29244	TRUE	s
1907	ST1907	ORF-T	YJR152W	DAL5	-0.259178	-5.45623	-1.51879	0.174667	0.276246	-6.16384	FALSE	ns
1908	ST1908	ORF-T	YJR153W	PGU1	0.0152758	-6.57927	0.0858004	0.934142	0.954218	-7.29272	FALSE	ns
1909	ST1909	ORF-T	YKL221W	MCH2	0.485552	-6.29256	2.26539	0.0596731	0.126995	-5.12157	FALSE	ns
1910	ST1910	ORF-T	YKL219W	COS9	0.265504	-2.71193	1.45831	0.190143	0.29407	-6.24108	FALSE	ns
1911	ST1911	CUTs	CUT224	CUT224	2.76638	-4.77921	1.92129	0.0981737	0.1807	-5.61721	FALSE	ns
1912	ST1912	SUTs	SUT218	SUT218	-0.61021	-5.06837	-2.6527	0.0342768	0.087002	-4.55251	FALSE	ns
1913	ST1913	SUTs	SUT219	SUT219	0.0106169	-5.82265	0.0505257	0.961182	0.974041	-7.29547	FALSE	ns
1914	ST1914	SUTs	SUT220	SUT220	0.00316586	-6.50529	0.0171535	0.986816	0.991999	-7.29676	FALSE	ns
1915	ST1915	ORF-T	YKL217W	JEN1	0.0879249	-6.32333	0.487559	0.641465	0.729434	-7.16326	FALSE	ns
1916	ST1916	ORF-T	YKL216W	URA1	-0.869483	-0.774014	-4.23563	0.00429887	0.0244728	-2.33505	TRUE	s
1917	ST1917	CUTs	CUT225	CUT225	0.632884	-6.19218	1.72267	0.130697	0.222896	-5.89308	FALSE	ns
1918	ST1918	ORF-T	YKL212W	SAC1	-0.58627	-1.73851	-3.39308	0.0124154	0.0448954	-3.4799	TRUE	s
1919	ST1919	other	snR64	SNR64	1.12575	-0.146092	4.90787	0.00198998	0.0159885	-1.49531	TRUE	s
1920	ST1920	CUTs	CUT226	CUT226	3.73667	-3.34264	8.09473	0.000109214	0.00328182	1.67463	TRUE	s
1921	ST1921	ORF-T	YKL210W	UBA1	-0.253344	-0.451144	-1.3558	0.219238	0.327506	-6.36821	FALSE	ns
1922	ST1922	ORF-T	YKL208W	CBT1	-0.498071	-5.03956	-2.46324	0.0448937	0.104603	-4.83134	FALSE	ns
1923	ST1923	ORF-T	YKL207W	YKL207W	-0.514946	-1.12172	-3.02108	0.0204996	0.061451	-4.01343	FALSE	ns
1924	ST1924	ORF-T	YKL205W	LOS1	-0.503875	-2.53384	-2.5684	0.0386341	0.0944787	-4.67657	FALSE	ns
1925	ST1925	ORF-T	YKL204W	EAP1	-0.277703	-3.37677	-1.48764	0.182488	0.284897	-6.20381	FALSE	ns
1926	ST1926	SUTs	SUT221	SUT221	0.788738	-4.16343	3.99045	0.00578872	0.0285975	-2.65795	TRUE	s
1927	ST1927	SUTs	SUT222	SUT222	2.03978	-3.95845	11.5799	1.15469997510001e-05	0.00109052	4.0707	TRUE	s
1928	ST1928	ORF-T	YKL195W	MIA40	-0.0682468	-3.11374	-0.315108	0.762301	0.824673	-7.24052	FALSE	ns
1929	ST1929	ORF-T	YKL191W	DPH2	-0.935458	-1.85994	-5.52499	0.0010372	0.0111297	-0.782391	TRUE	s
1930	ST1930	ORF-T	YKL190W	CNB1	-0.500762	-2.67399	-2.0916	0.0767249	0.151945	-5.37396	FALSE	ns
1931	ST1931	ORF-T	YKL189W	HYM1	-0.124375	-4.47952	-0.524993	0.616566	0.708768	-7.14237	FALSE	ns
1932	ST1932	SUTs	SUT223	SUT223	-0.0216612	-6.47847	-0.123684	0.905207	0.934109	-7.28818	FALSE	ns
1933	ST1933	SUTs	SUT224	SUT224	0.372369	-6.32979	1.38306	0.211135	0.318807	-6.3349	FALSE	ns
1934	ST1934	SUTs	SUT225	SUT225	0.0156364	-6.47463	0.0912304	0.929987	0.950909	-7.29217	FALSE	ns
1935	ST1935	ORF-T	YKL185W	ASH1	-1.18709	-2.43451	-6.62254	0.000365406	0.00640981	0.359421	TRUE	s
1936	ST1936	ORF-T	YKL184W	SPE1	-0.0663681	-1.37996	-0.35895	0.730716	0.799343	-7.22389	FALSE	ns
1937	ST1937	ORF-T	YKL183W	LOT5	-1.60151	-4.76303	-5.13698	0.00155314	0.014013	-1.2243	TRUE	s
1938	ST1938	ORF-T	YKL182W	FAS1	-0.823197	0.458811	-4.80566	0.00222786	0.0169152	-1.61868	TRUE	s
1939	ST1939	ORF-T	YKL181W	PRS1	-0.637084	-0.826749	-3.36054	0.012962	0.0459356	-3.52598	TRUE	s
1940	ST1940	ORF-T	YKL180W	RPL17A	1.03856	-0.962006	1.98057	0.0901059	0.170036	-5.53312	FALSE	ns
1941	ST1941	SUTs	SUT226	SUT226	-0.250071	-6.31053	-1.31335	0.232406	0.342158	-6.41935	FALSE	ns
1942	ST1942	ORF-T	YKL175W	ZRT3	-0.256578	-0.818458	-1.37825	0.212545	0.320138	-6.3408	FALSE	ns
1943	ST1943	ORF-T	YKL173W	SNU114	-0.6567	-3.70098	-3.73007	0.00801964	0.0347136	-3.01033	TRUE	s
1944	ST1944	ORF-T	YKL172W	EBP2	-0.288008	-2.2092	-1.65293	0.144406	0.239754	-5.98732	FALSE	ns
1945	ST1945	ORF-T	YKL171W	YKL171W	-0.54071	-4.36908	-3.18389	0.0164214	0.0536222	-3.77823	FALSE	ns
1946	ST1946	ORF-T	YKL170W	MRPL38	-0.539264	-3.14338	-3.02443	0.0204058	0.0613789	-4.00858	FALSE	ns
1947	ST1947	SUTs	SUT227	SUT227	-0.0706983	-6.59441	-0.402648	0.699789	0.775254	-7.20525	FALSE	ns
1948	ST1948	SUTs	SUT228	SUT228	0.614418	-3.41651	2.33859	0.0536952	0.11805	-5.01443	FALSE	ns
1949	ST1949	ORF-T	YKL163W	PIR3	1.33085	-3.37232	6.47718	0.000416318	0.0068806	0.216807	TRUE	s
1950	ST1950	SUTs	SUT229	SUT229	1.55436	-4.96299	8.97341	5.77891482256895e-05	0.00233684	2.36193	TRUE	s
1951	ST1951	ORF-T	YKL160W	ELF1	-0.335476	-1.33052	-1.73671	0.128093	0.219533	-5.87394	FALSE	ns
1952	ST1952	SUTs	SUT230	SUT230	-0.033696	-4.48283	-0.14206	0.891225	0.924666	-7.28539	FALSE	ns
1953	ST1953	ORF-T	YKL157W	APE2	-1.17241	-2.17774	-6.28141	0.000498042	0.00754159	0.0207416	TRUE	s
1954	ST1954	ORF-T	YKL156W	RPS27A	2.14152	-2.37626	6.14627	0.000565019	0.00794642	-0.117343	TRUE	s
1955	ST1955	ORF-T	YKL154W	SRP102	-0.177235	-2.98084	-0.933822	0.382933	0.500303	-6.828	FALSE	ns
1956	ST1956	ORF-T	YKL150W	MCR1	1.21118	-2.0797	7.15128	0.000231486	0.00504157	0.857829	TRUE	s
1957	ST1957	ORF-T	YKL146W	AVT3	-0.827871	-2.90146	-4.72027	0.00245102	0.0176098	-1.72293	TRUE	s
1958	ST1958	ORF-T	YKL145W, YKL145W-A	RPT1, YKL145W-A	-0.189996	-1.79764	-1.10553	0.307178	0.423388	-6.65486	FALSE	ns
1959	ST1959	ORF-T	YKL143W	LTV1	-0.188155	-3.14831	-0.891066	0.403866	0.519166	-6.86768	FALSE	ns
1960	ST1960	ORF-T	YKL142W	MRP8	0.114978	-2.03043	0.652227	0.536058	0.638214	-7.06094	FALSE	ns
1961	ST1961	CUTs	CUT227	CUT227	1.10541	-5.57282	4.92178	0.00195988	0.0158358	-1.47865	TRUE	s
1962	ST1962	ORF-T	YKL141W	SDH3	-0.227292	-0.955057	-1.31296	0.232528	0.342158	-6.4198	FALSE	ns
1963	ST1963	ORF-T	YKL140W	TGL1	-0.68498	-3.21247	-3.89922	0.00648155	0.0309521	-2.78033	TRUE	s
1964	ST1964	ORF-T	YKL139W	CTK1	-0.276645	-4.45712	-1.35348	0.21994	0.328151	-6.37103	FALSE	ns
1965	ST1965	other	YKL137W, YKL136W	CMC1, YKL136W	-0.253076	-3.13242	-0.994918	0.354464	0.471754	-6.76885	FALSE	ns
1966	ST1966	SUTs	SUT231	SUT231	0.897167	-5.20321	4.75583	0.00235519	0.0172999	-1.67938	TRUE	s
1967	ST1967	SUTs	SUT232	SUT232	1.88342	-5.16426	9.92102	3.08198038307668e-05	0.00172401	3.03494	TRUE	s
1968	ST1968	other	tK(CUU)K	tK(CUU)K	0.501805	-4.15739	2.48816	0.0433209	0.102415	-4.79468	FALSE	ns
1969	ST1969	ORF-T	YKL127W	PGM1	-0.950754	-1.49754	-4.17996	0.00459567	0.0252415	-2.40759	TRUE	s
1970	ST1970	ORF-T	YKL126W	YPK1	-0.730547	-2.17217	-4.00662	0.00567464	0.0282837	-2.63639	TRUE	s
1971	ST1971	ORF-T	YKL125W	RRN3	0.545583	-3.08835	3.1644	0.0168601	0.0544192	-3.80625	FALSE	ns
1972	ST1972	ORF-T	YKL124W, YKL123W	SSH4, YKL123W	-0.201659	-4.64393	-1.17792	0.279109	0.393426	-6.57578	FALSE	ns
1973	ST1973	ORF-T	YKL121W	YKL121W	-0.391251	-4.70593	-2.11054	0.0746499	0.149167	-5.34663	FALSE	ns
1974	ST1974	ORF-T	YKL120W	OAC1	0.0582678	-2.32212	0.294057	0.777647	0.837678	-7.24776	FALSE	ns
1975	ST1975	ORF-T	YKL117W	SBA1	-0.0452108	-0.623573	-0.235604	0.820804	0.871803	-7.26529	FALSE	ns
1976	ST1976	CUTs	CUT228	CUT228	-0.0800424	-6.26453	-0.463258	0.657903	0.742899	-7.17605	FALSE	ns
1977	ST1977	ORF-T	YKL112W	ABF1	-0.459594	-3.25943	-2.62266	0.0357672	0.0894426	-4.59671	FALSE	ns
1978	ST1978	SUTs	SUT233	SUT233	0.283674	-6.1479	1.66159	0.142633	0.237895	-5.97571	FALSE	ns
1979	ST1979	ORF-T	YKL109W	HAP4	-1.57697	-2.25783	-9.22452	4.86550482532221e-05	0.00221137	2.54676	TRUE	s
1980	ST1980	ORF-T	YKL108W	SLD2	-0.309628	-5.40545	-1.73434	0.128529	0.219869	-5.87717	FALSE	ns
1981	ST1981	ORF-T	YKL107W	YKL107W	0.126506	-6.58625	0.738272	0.485488	0.593534	-6.99712	FALSE	ns
1982	ST1982	ORF-T	YKL106W	AAT1	-0.444321	-2.4984	-2.27029	0.0592523	0.126544	-5.11441	FALSE	ns
1983	ST1983	CUTs	CUT229	CUT229	2.23705	-4.16763	13.0418	5.37977671730555e-06	0.000752341	4.86	TRUE	s
1984	ST1984	ORF-T	YKL101W	HSL1	-0.37091	-2.81011	-1.76555	0.122896	0.212691	-5.8344	FALSE	ns
1985	ST1985	CUTs	CUT230	CUT230	0.288021	-5.78839	1.18773	0.275479	0.38929	-6.56482	FALSE	ns
1986	ST1986	ORF-T	YKL098W	YKL098W	-0.319984	-3.65801	-1.82843	0.112259	0.199052	-5.74742	FALSE	ns
1987	ST1987	ORF-T	YKL096W-A	CWP2	0.0723407	1.52273	0.424288	0.684694	0.763547	-7.19527	FALSE	ns
1988	ST1988	ORF-T	YKL096W	CWP1	-1.23913	-0.805252	-6.43524	0.000432465	0.0070513	0.175193	TRUE	s
1989	ST1989	ORF-T	YKL095W	YJU2	-0.100148	-5.39997	-0.478441	0.647608	0.734238	-7.16813	FALSE	ns
1990	ST1990	ORF-T	YKL094W	YJU3	-0.260328	-2.62489	-1.51446	0.175734	0.277565	-6.16941	FALSE	ns
1991	ST1991	ORF-T	YKL093W	MBR1	0.10737	-4.75414	0.624809	0.552845	0.65275	-7.07982	FALSE	ns
1992	ST1992	ORF-T	YKL090W	CUE2	0.538983	-4.64187	2.41368	0.0482003	0.109604	-4.90422	FALSE	ns
1993	ST1993	ORF-T	YKL089W	MIF2	-0.559851	-5.25746	-3.16786	0.0167812	0.054252	-3.80127	FALSE	ns
1994	ST1994	ORF-T	YKL088W	YKL088W	-0.280335	-4.40228	-1.51432	0.175768	0.277565	-6.16959	FALSE	ns
1995	ST1995	ORF-T	YKL086W	SRX1	-0.469168	-6.203	-1.90031	0.101197	0.184742	-5.6468	FALSE	ns
1996	ST1996	ORF-T	YKL085W	MDH1	-0.29535	-2.31204	-1.68924	0.137107	0.230903	-5.93845	FALSE	ns
1997	ST1997	other	YKL084W, YKL083W	HOT13, YKL083W	-0.322859	-2.30562	-1.80647	0.115869	0.203674	-5.77792	FALSE	ns
1998	ST1998	ORF-T	YKL081W, snR38	TEF4, SNR38	-0.155442	1.23193	-0.852991	0.423211	0.536727	-6.90178	FALSE	ns
1999	ST1999	ORF-T	YKL080W	VMA5	-0.733519	-0.394042	-4.2499	0.00422625	0.0241614	-2.31653	TRUE	s
[truncated: 5,273 more rows]
